# Supplementary material for: Liquid Biopsies Poorly miRror Renal Ischemia-Reperfusion Injury
Source: MDPI journal article supplement (doi:10.3390/ncrna9020024), 2023-04-01
Supplement: s1 [file s1]

**Table S4.** DE miRNAs from IR vs. sham comparisons common between plasma and urine samples. Decrease in miR abundance with IR indicated in **green** and increase in miR abundance with IR within indicated in **red**. As in Table S1, these miRs share 100% seed sequence homology between rat (rno), mouse (mmu) and human (hsa).

| Overlapping miRs | Plasma<br>(log2FC) | Urine<br>(log2FC) |
|------------------|--------------------|-------------------|
| rno-miR-378a-3p  | 1.4357             | 0.8812            |
| rno-miR-423-3p   | 0.9458             | 1.3515            |
| rno-miR-3556b    | 1.7866             | 1.6383            |
| rno-miR-3557-5p  | 1.3752             | 0.9581            |
| rno-miR-3590-5p  | 2.1782             | 1.8741            |
| rno-miR-215      | -1.1731            | 3.0324            |
