# Supplementary material for: Liquid Biopsies Poorly miRror Renal Ischemia-Reperfusion Injury
Source: MDPI journal article supplement (doi:10.3390/ncrna9020024), 2023-04-01
Supplement: s1 [file s1]

**Table S1.** Basic rat phenotypes collected 24 hours after reperfusion (or corresponding sham surgery).  
 \*Urine volumes represent the volume of urine collected from metabolic caging in the period between recovery from surgical anesthesia and endpoint at 24 hours post-reperfusion (or sham surgery)

| Rat ID   | Study Group | Body Weight (g) | Right Kidney Weight (g) | Left Kidney Weight (g) | Urine Volume (mL) |
|----------|-------------|-----------------|-------------------------|------------------------|-------------------|
| IRRCS_1  | IR          | 356.0           | 1.936                   | 1.759                  | 7                 |
| IRRCS_2  | IR          | 301.2           | 1.157                   | 1.2061                 | 4.5               |
| IRRCS_3  | IR          | 299.6           | 1.246                   | 1.2403                 | 10                |
| IRRCS_7  | IR          | 310.5           | 1.2028                  | 1.2750                 | 4                 |
| IRRCS_10 | IR          | 325.4           | 1.5221                  | 1.3541                 | 7.5               |
| IRRCS_11 | IR          | 326.3           | 1.2108                  | 1.5696                 | 4                 |
| IRRCS_12 | IR          | 329.6           | 1.3621                  | 1.3205                 | 9                 |
| IRRCS_4  | Sham        | 322.8           | 1.975                   | 1.0997                 | 5                 |
| IRRCS_5  | Sham        | 292.9           | 0.9165                  | 0.893                  | 4                 |
| IRRCS_6  | Sham        | 303.0           | 1.0353                  | 1.0258                 | 5                 |
| IRRCS_8  | Sham        | 304.2           | 1.229                   | 1.2045                 | 3.5               |
| IRRCS_9  | Sham        | 298.3           | 1.0418                  | 1.0433                 | 4                 |
