# Supplementary material for: Liquid Biopsies Poorly miRror Renal Ischemia-Reperfusion Injury
Source: MDPI journal article supplement (doi:10.3390/ncrna9020024), 2023-04-01
Supplement: s1 [file s1]

**Table S5.** DE miRNAs from IR vs. sham comparisons common between plasma and cortex samples. Within sample type, a decrease in miR abundance with IR indicated in **green** and increase in miR abundance with IR within indicated in **red**. As in Table S1, these miRs share 100% seed sequence homology between rat (rno), mouse (mmu) and human (hsa).

| Overlapping miRs  | Plasma<br>(log2FC) | Cortex<br>(log2FC) |
|-------------------|--------------------|--------------------|
| rno-miR-466b-2-3p | 1.5071             | 1.547              |
| rno-miR-144-3p    | -1.7298            | -1.2127            |
| rno-miR-3553      | 4.4954             | -1.2531            |
| rno-miR-182       | 4.6282             | -1.2651            |
| rno-miR-183-5p    | 4.5408             | -1.3014            |
| rno-miR-192-5p    | 2.3489             | -0.6567            |
| rno-miR-203a-3p   | 2.3999             | -0.6541            |
| rno-miR-375-3p    | 1.9447             | -1.0184            |
