# Supplementary material for: Liquid Biopsies Poorly miRror Renal Ischemia-Reperfusion Injury
Source: MDPI journal article supplement (doi:10.3390/ncrna9020024), 2023-04-01
Supplement: s1 [file s1]

**Table S3.** DE miRNAs from IR vs. sham comparisons with 100% seed sequence homology between rat (rno), mouse (mmu) and human (hsa). Change ( $\Delta$ ) in miR abundance with IR indicated by arrows with ( $\downarrow$  = decreased and  $\uparrow$  = increased).

| Sample Type | DE miRs            | $\Delta$ with IR (vs. Sham) | log2FC  |
|-------------|--------------------|-----------------------------|---------|
| Plasma      | hsa-miR-103b       | $\uparrow$                  | 2.8621  |
|             | rno-miR-10a-3p     | $\uparrow$                  | 2.2347  |
|             | rno-miR-10a-5p     | $\uparrow$                  | 1.3384  |
|             | rno-miR-130a-3p    | $\uparrow$                  | 1.8197  |
|             | rno-miR-151-5p     | $\uparrow$                  | 0.8299  |
|             | rno-miR-200a-5p    | $\uparrow$                  | 1.9999  |
|             | rno-miR-218a-1-3p  | $\uparrow$                  | 2.7310  |
|             | rno-miR-219a-2-3p  | $\uparrow$                  | 4.0006  |
|             | rno-miR-22-5p      | $\uparrow$                  | 1.4025  |
|             | rno-miR-3085       | $\uparrow$                  | 2.8706  |
|             | rno-miR-320-3p     | $\uparrow$                  | 1.3973  |
|             | rno-miR-760-3p     | $\uparrow$                  | 1.5145  |
|             | rno-miR-99b-5p     | $\uparrow$                  | 1.1626  |
|             | rno-miR-365-5p     | $\uparrow$                  | 2.2419  |
|             | rno-miR-219b       | $\uparrow$                  | 3.8698  |
|             | rno-miR-3556a      | $\uparrow$                  | 1.9021  |
|             | rno-miR-203b-5p    | $\uparrow$                  | 2.9047  |
|             | rno-miR-429        | $\uparrow$                  | 1.8244  |
|             | rno-miR-203a-5p    | $\uparrow$                  | 3.6243  |
|             | rno-miR-203b-3p    | $\uparrow$                  | 3.6009  |
|             | rno-miR-192-5p     | $\uparrow$                  | 2.3489  |
|             | rno-miR-378b       | $\uparrow$                  | 1.4002  |
|             | rno-miR-504        | $\uparrow$                  | 2.7498  |
|             | rno-miR-183-3p     | $\uparrow$                  | 3.7737  |
|             | rno-miR-125a-5p    | $\downarrow$                | -1.1335 |
|             | rno-miR-142-3p     | $\downarrow$                | -1.4314 |
|             | rno-miR-143-3p     | $\downarrow$                | -1.2803 |
|             | rno-miR-145-5p     | $\downarrow$                | -0.7914 |
|             | rno-miR-150-5p     | $\downarrow$                | -1.1176 |
|             | rno-miR-199a-3p    | $\downarrow$                | -1.2610 |
|             | rno-miR-19a-3p     | $\downarrow$                | -1.9437 |
|             | rno-miR-19b-3p     | $\downarrow$                | -1.7820 |
|             | rno-miR-335        | $\downarrow$                | -1.4600 |
|             | rno-miR-340-5p     | $\downarrow$                | -1.5643 |
|             | rno-miR-455-5p     | $\downarrow$                | -1.9201 |
|             | rno-miR-497-5p     | $\downarrow$                | -1.2544 |
|             | rno-miR-133a-3p    | $\downarrow$                | -1.4758 |
|             | rno-miR-133a-5p    | $\downarrow$                | -1.4729 |
|             | rno-miR-101a-5p    | $\downarrow$                | -1.6440 |
|             | rno-miR-362-3p     | $\downarrow$                | -1.6050 |
|             | rno-miR-488-3p     | $\downarrow$                | -1.6699 |
|             | rno-miR-3559-5p    | $\downarrow$                | -1.5638 |
|             | rno-miR-133c       | $\downarrow$                | -1.2915 |
| Urine       | rno-miR-22-3p      | $\uparrow$                  | 0.6700  |
|             | rno-miR-877        | $\uparrow$                  | 2.4805  |
|             | let-7e-5p          | $\downarrow$                | -1.4761 |
|             | miR-196b-5p        | $\downarrow$                | -1.4190 |
|             | miR-23b-3p         | $\downarrow$                | -2.4490 |
|             | miR-26a-5p         | $\downarrow$                | -1.3099 |
|             | miR-27b-3p         | $\downarrow$                | -1.0790 |
|             | miR-351-5p         | $\downarrow$                | -2.7794 |
|             | let-7a-5p          | $\uparrow$                  | 0.3956  |
|             | let-7c-5p          | $\uparrow$                  | 0.7022  |
|             | rno-miR-132-3p     | $\uparrow$                  | 2.2297  |
|             | rno-miR-146b-5p    | $\uparrow$                  | 2.1612  |
|             | rno-miR-147        | $\uparrow$                  | 1.3324  |
|             | rno-miR-155-5p     | $\uparrow$                  | 1.4300  |
|             | rno-miR-18a-5p     | $\uparrow$                  | 1.8245  |
|             | rno-miR-20a-5p     | $\uparrow$                  | 0.8320  |
|             | rno-miR-212-3p     | $\uparrow$                  | 1.9420  |
|             | rno-miR-21-3p      | $\uparrow$                  | 1.6191  |
|             | rno-miR-21-5p      | $\uparrow$                  | 1.3052  |
|             | rno-miR-221-3p     | $\uparrow$                  | 0.8981  |
|             | rno-miR-221-5p     | $\uparrow$                  | 0.7743  |
|             | rno-miR-222-3p     | $\uparrow$                  | 1.0252  |
|             | rno-miR-27a-5p     | $\uparrow$                  | 1.3213  |
|             | rno-miR-3473       | $\uparrow$                  | 2.3535  |
|             | rno-miR-34c-5p     | $\uparrow$                  | 1.2235  |
|             | rno-miR-3596a      | $\uparrow$                  | 0.3480  |
|             | rno-miR-449a-5p    | $\uparrow$                  | 1.4869  |
|             | rno-miR-672-5p     | $\uparrow$                  | 0.6846  |
|             | rno-miR-708-5p     | $\uparrow$                  | 1.0462  |
|             | rno-miR-92a-1-5p   | $\uparrow$                  | 1.3291  |
|             | rno-miR-98-5p      | $\uparrow$                  | 0.5486  |
|             | hsa-miR-486-5p     | $\downarrow$                | -0.9168 |
|             | rno-miR-125-b-2-3p | $\downarrow$                | -0.6346 |
|             | rno-miR-144-5p     | $\downarrow$                | -0.9183 |
|             | rno-miR-194-5p     | $\downarrow$                | -0.6254 |
|             | rno-miR-200-3p     | $\downarrow$                | -0.4505 |
|             | rno-miR-201-5p     | $\downarrow$                | -0.5956 |
|             | rno-miR-30c-5p     | $\downarrow$                | -0.7125 |
|             | rno-miR-30e-5p     | $\downarrow$                | -0.5930 |
|             | rno-miR-3585-5p    | $\downarrow$                | -0.8564 |
|             | rno-miR-499-5p     | $\downarrow$                | -0.7358 |
| Cortex      | let-7a-5p          | $\uparrow$                  | 0.3956  |
|             | let-7c-5p          | $\uparrow$                  | 0.7022  |
|             | rno-miR-132-3p     | $\uparrow$                  | 2.2297  |
|             | rno-miR-146b-5p    | $\uparrow$                  | 2.1612  |
|             | rno-miR-147        | $\uparrow$                  | 1.3324  |
|             | rno-miR-155-5p     | $\uparrow$                  | 1.4300  |
|             | rno-miR-18a-5p     | $\uparrow$                  | 1.8245  |
|             | rno-miR-20a-5p     | $\uparrow$                  | 0.8320  |
|             | rno-miR-212-3p     | $\uparrow$                  | 1.9420  |
|             | rno-miR-21-3p      | $\uparrow$                  | 1.6191  |
|             | rno-miR-21-5p      | $\uparrow$                  | 1.3052  |
|             | rno-miR-221-3p     | $\uparrow$                  | 0.8981  |
|             | rno-miR-221-5p     | $\uparrow$                  | 0.7743  |
|             | rno-miR-222-3p     | $\uparrow$                  | 1.0252  |
|             | rno-miR-27a-5p     | $\uparrow$                  | 1.3213  |
|             | rno-miR-3473       | $\uparrow$                  | 2.3535  |
|             | rno-miR-34c-5p     | $\uparrow$                  | 1.2235  |
|             | rno-miR-3596a      | $\uparrow$                  | 0.3480  |
|             | rno-miR-449a-5p    | $\uparrow$                  | 1.4869  |
|             | rno-miR-672-5p     | $\uparrow$                  | 0.6846  |
|             | rno-miR-708-5p     | $\uparrow$                  | 1.0462  |
|             | rno-miR-92a-1-5p   | $\uparrow$                  | 1.3291  |
|             | rno-miR-98-5p      | $\uparrow$                  | 0.5486  |
|             | hsa-miR-486-5p     | $\downarrow$                | -0.9168 |
|             | rno-miR-125-b-2-3p | $\downarrow$                | -0.6346 |
|             | rno-miR-144-5p     | $\downarrow$                | -0.9183 |
|             | rno-miR-194-5p     | $\downarrow$                | -0.6254 |
|             | rno-miR-200-3p     | $\downarrow$                | -0.4505 |
|             | rno-miR-201-5p     | $\downarrow$                | -0.5956 |
|             | rno-miR-30c-5p     | $\downarrow$                | -0.7125 |
|             | rno-miR-30e-5p     | $\downarrow$                | -0.5930 |
|             | rno-miR-3585-5p    | $\downarrow$                | -0.8564 |
|             | rno-miR-499-5p     | $\downarrow$                | -0.7358 |
