# Supplementary material for: Liquid Biopsies Poorly miRror Renal Ischemia-Reperfusion Injury
Source: Noncoding RNA. 2023 Apr 1;9(2):24. doi: 10.3390/ncrna9020024 (PMC10141369; doi:10.3390/ncrna9020024)
Supplement: Supplementary file 1 [file ncrna-09-00024-s001.zip]

Archive with 5 entries (5 files):
- Table S1.pdf
- Table S2.xlsx
- Table S3.pdf
- Table S4.pdf
- Table S5.pdf
