# Supplementary material for: Liquid Biopsies Poorly miRror Renal Ischemia-Reperfusion Injury
Source: Noncoding RNA. 2023 Apr 1;9(2):24. doi: 10.3390/ncrna9020024 (PMC10141369; doi:10.3390/ncrna9020024)
Supplement: Supplementary file 1 [file ncrna-09-00024-s001.zip › Table S2.xlsx]

## Sheet: Table S2_Legend
miR Sequencing Results
1.1. Mapping rate from small-RNA sequencing
1.2. miR counts obtained form each sample
1.3. Statistical analysis of cortex miRs (IR vs. Sham, DESeq2 + BH correction)
1.4. Statistical analysis of urine miRs (IR vs. Sham, DESeq2 + BH correction)
1.5. Statistical analysis of plasma miRs (IR vs. Sham, DESeq2 + BH correction)

## Sheet: 2.1_Mapping Rate
Samples	Experimental Group	Total Unique Reads	Total Reads	Unmapped Unique Reads	Unmapped Reads	% Mapped Reads
IRRCS_1_cortex	IR	352135	6217811	85043	1226233	80.3
IRRCS_2_cortex	IR	256715	6134877	60645	1553153	74.7
IRRCS_3_cortex	IR	326691	6614741	86303	1500123	77.3
IRRCS_4_cortex	Sham	262022	7995978	54669	725029	90.9
IRRCS_5_cortex	Sham	252628	5393993	55330	502791	90.7
IRRCS_6_cortex	Sham	265052	6269773	61706	1461425	76.7
IRRCS_7_cortex	IR	354181	6817515	82184	1952255	71.4
IRRCS_8_cortex	Sham	312868	8320989	69719	1015094	87.8
IRRCS_9_cortex	Sham	255656	6527845	63419	841176	87.1
IRRCS_10_cortex	IR	224913	4986235	60675	1698917	65.9
IRRCS_11_cortex	IR	258554	4102884	86336	1442591	64.8
IRRCS_12_cortex	IR	282709	5067871	68987	2128861	58
IRRCS_1_urine	IR	297861	3771158	152154	1445089	61.7
IRRCS_2_urine	IR	263096	3360001	141639	2244927	33.2
IRRCS_3_urine	IR	356334	3984955	175270	1990925	50
IRRCS_4_urine	Sham	95988	4068732	41583	3290056	19.1
IRRCS_5_urine	Sham	109318	3909390	56351	3223855	17.5
IRRCS_6_urine	Sham	600538	9123744	368953	7380760	19.1
IRRCS_7_urine	IR	747078	3132950	447181	1675627	46.5
IRRCS_8_urine	Sham	432768	3203891	250013	1770242	44.7
IRRCS_9_urine	Sham	93205	3373681	41982	2521574	25.3
IRRCS_10_urine	IR	641086	3904172	388392	2201909	43.6
IRRCS_11_urine	IR	13184	302981	5538	127156	58
IRRCS_12_urine	IR	523267	4014606	307035	2336142	41.8
IRRCS_1_plasma	IR	455220	3964428	80914	781617	80.3
IRRCS_2_plasma	IR	512693	4914028	97218	1010469	79.4
IRRCS_3_plasma	IR	406774	4053342	87277	841478	79.2
IRRCS_4_plasma	Sham	429367	4009001	88778	477000	88.1
IRRCS_5_plasma	Sham	497593	4047775	84931	469785	88.4
IRRCS_6_plasma	Sham	351261	4067860	78381	625099	84.6
IRRCS_7_plasma	IR	812109	10758413	188712	1921274	82.1
IRRCS_8_plasma	Sham	674778	3408483	104035	758879	77.7
IRRCS_9_plasma	Sham	317476	2451475	58808	322975	86.8
IRRCS_10_plasma	IR	256015	2644327	67640	546637	79.3
IRRCS_11_plasma	IR	471895	3181220	99758	648080	79.6
IRRCS_12_plasma	IR	332349	2771244	91345	728374	73.7

## Sheet: 2.2_miR counts
	IR	IR	IR	Sham	Sham	Sham	IR	Sham	Sham	IR	IR	IR	IR	IR	IR	Sham	Sham	Sham	IR	Sham	Sham	IR	IR	IR	IR	IR	IR	Sham	Sham	Sham	IR	Sham	Sham	IR	IR	IR
miR	IRRCS_1_cortex	IRRCS_2_cortex	IRRCS_3_cortex	IRRCS_4_cortex	IRRCS_5_cortex	IRRCS_6_cortex	IRRCS_7_cortex	IRRCS_8_cortex	IRRCS_9_cortex	IRRCS_10_cortex	IRRCS_11_cortex	IRRCS_12_cortex	IRRCS_1_urine	IRRCS_2_urine	IRRCS_3_urine	IRRCS_4_urine	IRRCS_5_urine	IRRCS_6_urine	IRRCS_7_urine	IRRCS_8_urine	IRRCS_9_urine	IRRCS_10_urine	IRRCS_11_urine	IRRCS_12_urine	IRRCS_1_plasma	IRRCS_2_plasma	IRRCS_3_plasma	IRRCS_4_plasma	IRRCS_5_plasma	IRRCS_6_plasma	IRRCS_7_plasma	IRRCS_8_plasma	IRRCS_9_plasma	IRRCS_10_plasma	IRRCS_11_plasma	IRRCS_12_plasma	category
rno-let-7a-1-3p#rno-let-7c-2-3p	349	239	183	369	319	240	172	363	257	164	130	138	6	0	6	6	2	18	3	5	5	4	0	1	8	20	5	16	2	28	32	3	3	4	10	0	mature_unique
rno-let-7a-5p	14109	12106	13121	10541	13465	7821	12437	14008	11574	7282	5968	5957	113	136	664	371	393	442	186	184	576	119	2	56	1493	10545	4262	3864	1767	2838	12699	1366	1624	1297	6273	520	mature_unique
rno-let-7b-3p	152	131	117	368	176	126	120	233	218	75	61	71	5	1	7	4	2	7	6	1	1	3	0	0	34	51	50	13	33	16	142	20	8	20	45	0	mature_unique
rno-let-7b-5p	6643	4581	4810	4931	5637	2955	6285	4840	3943	2519	2103	2310	153	37	291	79	79	143	170	157	167	96	1	27	380	1110	490	811	387	436	1884	314	211	264	453	257	mature_unique
rno-let-7c-5p	19682	15483	17718	12499	15262	8491	19756	14987	12132	9081	8020	8148	148	215	856	669	553	643	260	259	1294	209	3	41	1396	5114	2479	3108	1660	1755	8243	1249	1160	1286	2161	1054	mature_unique
rno-let-7d-3p	580	426	394	380	534	475	646	717	713	303	248	257	28	24	90	29	22	57	25	28	29	39	0	6	852	2695	1451	1792	1459	1002	4263	777	471	585	1435	122	mature_unique
rno-let-7d-5p	2242	1391	1894	2021	2449	1423	1178	1947	2012	950	817	727	9	17	127	74	79	86	34	24	123	19	0	3	474	2121	1008	1508	646	940	2455	434	399	270	841	48	mature_unique
rno-let-7e-3p	27	26	19	49	23	24	30	21	33	26	16	7	0	0	3	0	0	0	0	0	2	0	0	0	2	4	2	2	0	1	4	3	0	2	3	0	mature_unique
rno-let-7e-5p	2172	1994	2311	1929	2167	1630	1985	2527	2285	1322	1105	1110	5	19	105	105	113	117	41	58	119	12	0	6	30	312	120	145	102	143	317	98	91	129	224	43	mature_unique
rno-let-7f-1-3p	57	30	30	79	46	36	33	81	53	30	29	17	2	0	0	1	2	0	1	0	2	2	0	0	4	3	8	13	3	6	18	4	1	5	8	0	mature_unique
rno-let-7f-2-3p	61	50	50	95	52	53	36	90	67	47	21	33	3	1	1	1	4	0	2	1	3	0	0	0	1	11	4	4	2	8	12	2	2	4	3	0	mature_unique
rno-let-7f-5p	32496	31510	35889	26332	34817	27713	21818	43507	42450	22668	18004	15187	543	609	3063	2173	2004	1889	839	692	2487	403	202	146	2092	23326	7191	10044	2545	9532	23429	1722	6340	2006	11513	1120	mature_unique
rno-let-7i-3p	39	26	11	25	25	11	51	23	15	13	15	9	0	0	1	0	0	2	0	0	0	1	0	0	0	6	3	7	2	6	15	2	2	1	3	2	mature_unique
rno-let-7i-5p	12638	12161	14389	13138	14101	11835	8995	18460	16112	8569	6970	6747	123	79	482	271	274	253	148	111	1040	80	1	35	1468	10248	3420	8010	2125	6573	12237	1551	4202	1177	3396	643	mature_unique
rno-miR-100-5p	1454	602	446	1497	1118	589	647	884	771	305	210	297	0	1	0	0	1	1	1	1	0	0	226	2	52	129	82	139	91	240	289	206	38	113	72	81	mature_unique
rno-miR-101a-3p	6688	6303	8943	6275	8831	6209	3565	13573	10141	4450	3134	2664	92	47	124	151	201	115	179	91	397	153	62	27	51	139	63	110	56	483	317	44	381	77	88	58	mature_unique
rno-miR-101a-5p	2753	2520	4141	4034	3081	2301	1325	4723	3352	1649	1147	1058	30	20	26	32	44	24	59	31	103	25	0	15	21	97	37	94	45	441	207	32	334	65	66	23	mature_unique
rno-miR-101b-3p	452	411	641	499	501	402	239	913	575	307	250	231	8	5	14	12	23	10	23	12	29	18	0	4	43	111	44	115	29	223	199	19	191	37	67	37	mature_unique
rno-miR-103-3p	1781	2112	3159	4820	2494	2707	1674	4714	3339	1836	1256	1135	48	24	97	95	69	72	49	31	213	19	0	17	232	1030	418	996	235	476	1191	178	412	167	420	130	mature_unique
rno-miR-106b-3p	54	58	75	59	56	46	64	60	63	33	37	38	2	2	4	5	3	10	2	3	20	0	0	0	195	255	185	187	137	234	470	109	112	63	107	116	mature_unique
rno-miR-106b-5p	91	55	56	126	89	41	50	92	71	32	26	30	0	0	0	1	2	2	1	0	1	1	0	0	14	57	16	45	15	108	83	17	29	17	12	0	mature_unique
rno-miR-107-3p	1083	1100	1577	3070	1346	1301	757	2386	1694	767	517	507	34	11	77	47	42	34	29	21	104	14	0	9	18	102	39	73	13	34	104	11	18	24	30	2	mature_unique
rno-miR-10a-3p	167	149	189	233	192	152	74	273	218	87	82	72	7	1	12	8	6	9	11	2	10	5	0	0	43	63	56	19	5	17	235	9	2	75	96	3	mature_unique
rno-miR-10a-5p	837559	928398	861281	1844318	898623	966812	980747	1565004	1125048	592289	391710	401746	22574	5347	30243	32517	18012	49448	17863	8830	42859	10138	1695	4371	40003	48418	45834	23727	16817	30283	183170	24142	15800	39862	54223	89470	mature_unique
rno-miR-10b-3p	63	40	38	105	74	35	34	80	65	19	24	28	1	1	1	2	2	0	0	0	1	1	0	0	4	7	15	4	7	8	41	4	4	4	11	2	mature_unique
rno-miR-10b-5p	98	89	178	188	107	98	89	178	116	53	61	35	2	1	2	4	3	2	2	1	7	1	1	0	4	8	5	1	1	2	8	3	10	5	5	114	mature_unique
rno-miR-122-5p	1	1	4	3	6	3	4	11	19	3	1	0	0	0	0	0	0	0	0	1	0	0	0	0	7	3	2	26	6	9	39	3	6	2	0	4	mature_unique
rno-miR-1249	27	17	10	35	18	24	31	24	21	7	7	10	0	0	2	2	4	2	0	1	0	0	0	1	3	0	4	0	4	4	8	5	1	0	2	0	mature_unique
rno-miR-125a-3p	15	22	23	27	25	27	26	33	29	6	13	16	0	0	2	0	1	0	2	0	1	1	0	0	8	25	8	8	5	10	44	5	4	26	13	7	mature_unique
rno-miR-125a-5p	14519	8210	6714	11485	19164	9233	10170	10860	11473	4266	3373	4363	131	31	301	221	155	217	84	81	211	38	0	11	229	442	347	577	794	717	1200	703	290	295	259	106	mature_unique
rno-miR-125b-1-3p	113	77	98	30	90	82	71	65	81	65	65	50	0	0	0	0	0	0	0	0	0	0	0	0	29	67	36	44	57	103	106	87	27	65	33	17	mature_unique
rno-miR-125b-2-3p	292	355	541	599	585	653	200	868	825	285	185	210	5	0	13	10	11	17	1	2	13	4	0	1	100	323	193	262	186	354	696	228	120	286	193	90	mature_unique
rno-miR-125b-5p	6514	1709	1420	2699	6151	1879	1998	2243	2482	1004	684	832	3	1	4	12	9	9	2	3	9	4	153	4	28	38	60	65	49	124	109	99	23	75	23	12	mature_unique
rno-miR-126a-3p	5560	4039	4677	5338	5027	4050	3173	5920	5882	2708	2209	1864	1	1	2	3	1	4	4	0	0	0	0	2	73	219	122	221	117	383	427	203	65	139	213	6	mature_unique
rno-miR-126a-5p	21606	18412	29227	36875	28252	21458	7992	42196	36749	13199	12013	11420	22	12	11	15	5	26	16	8	18	18	2	8	705	3575	1368	4520	2306	6299	6129	3590	1208	2324	2032	113	mature_unique
rno-miR-127-3p	70	33	40	127	66	74	58	151	116	42	66	31	1	1	0	0	1	2	0	0	1	0	0	0	119	234	159	203	97	201	920	311	101	145	238	30	mature_unique
rno-miR-128-1-5p	8	10	21	20	4	6	5	13	15	8	4	4	0	0	0	0	1	0	0	0	1	0	0	0	7	26	8	18	17	9	25	5	8	3	10	38	mature_unique
rno-miR-128-3p	157	144	121	162	233	165	79	233	302	102	107	105	15	4	41	11	17	15	23	7	18	16	0	4	3121	18691	5901	12122	3943	5166	20636	3390	1904	1806	8422	422	mature_unique
rno-miR-129-5p	10	9	7	10	6	7	6	13	5	7	4	3	0	0	0	0	0	0	0	0	0	0	0	0	0	5	3	1	2	2	10	0	0	1	1	7	mature_unique
rno-miR-1306-5p	6	1	1	3	2	4	1	6	2	0	2	1	0	0	0	0	0	0	0	0	0	0	0	0	7	19	4	14	12	8	31	4	9	4	3	2	mature_unique
rno-miR-130a-3p	5881	2175	3785	3448	6254	3037	1615	3910	3737	1679	1390	1419	190	67	510	110	93	100	298	43	151	205	0	53	2162	9776	5712	2208	695	1781	17137	703	746	3894	5351	1095	mature_unique
rno-miR-130b-3p	66	29	41	46	41	29	15	20	32	18	18	26	4	2	3	3	1	4	3	1	3	3	0	1	168	907	303	619	194	533	1064	163	115	94	338	121	mature_unique
rno-miR-130b-5p	2	2	3	4	2	1	3	3	3	0	2	1	0	0	0	0	0	0	1	0	1	0	0	0	3	26	4	22	15	18	30	9	3	1	12	0	mature_unique
rno-miR-132-3p	73	30	73	7	11	18	54	14	21	43	33	41	0	1	0	1	0	1	0	0	0	0	0	0	7	27	6	23	12	11	28	9	9	10	11	3	mature_unique
rno-miR-133a-3p	1	6	4	4	4	6	6	7	15	2	1	2	1	2	0	0	0	0	0	0	1	1	42	0	219	597	388	620	1813	823	1223	1739	304	517	598	12	mature_unique
rno-miR-133a-5p	0	0	0	0	0	0	1	0	0	0	0	0	0	0	0	0	0	0	0	1	0	0	0	0	12	48	27	29	23	77	99	41	121	21	17	6	mature_unique
rno-miR-133c	3	1	1	0	1	0	3	0	4	1	2	1	0	0	0	0	0	0	0	0	1	0	1	0	62	92	80	114	186	103	274	292	88	77	77	12	mature_unique
rno-miR-134-5p	40	35	40	49	33	20	33	30	36	15	15	11	1	0	0	0	0	0	0	0	0	0	0	0	6	24	18	7	8	12	49	5	4	11	17	0	mature_unique
rno-miR-135a-5p	8	5	0	30	6	0	3	7	8	0	2	0	0	0	0	1	0	0	0	0	0	0	0	0	0	0	0	0	0	0	0	0	0	0	0	0	mature_unique
rno-miR-136-3p	2	1	2	5	4	5	1	8	8	0	3	2	0	0	0	0	0	0	0	0	0	2	0	0	1	32	7	20	7	28	50	21	12	5	7	0	mature_unique
rno-miR-138-5p	67	29	38	38	71	18	31	59	35	26	21	24	0	1	1	2	6	3	1	1	3	0	0	2	54	324	81	260	70	193	290	67	135	67	129	90	mature_unique
rno-miR-139-5p	136	45	70	165	81	42	71	107	72	32	26	32	0	0	0	0	0	0	0	0	0	0	0	0	8	28	18	15	15	12	37	22	8	5	14	0	mature_unique
rno-miR-1-3p	3	1	4	3	6	2	2	3	6	2	2	0	0	0	0	0	0	0	0	0	0	0	0	0	0	1	0	0	0	1	0	0	0	0	1	2	mature_unique
rno-miR-140-3p	1957	1883	2461	2120	2161	2077	2065	4286	2814	1632	1144	1100	74	21	113	49	58	74	62	27	162	40	1	23	4657	16720	8770	15949	7399	21571	26051	7603	8578	8215	7581	25251	mature_unique
rno-miR-140-5p	115	66	97	143	117	131	53	183	141	71	58	57	2	0	1	2	3	1	0	1	3	0	0	1	3	32	20	58	15	29	37	12	9	5	15	0	mature_unique
rno-miR-141-3p	1425	924	765	1513	1313	752	455	1212	950	500	421	405	22	22	28	102	43	295	110	54	78	59	0	19	2	7	3	7	1	15	11	4	1	2	3	0	mature_unique
rno-miR-141-5p	26	12	32	10	19	11	18	14	21	4	10	8	3	0	0	4	0	9	1	2	1	1	0	1	0	1	0	0	0	0	0	0	1	1	0	0	mature_unique
rno-miR-142-3p	228	136	132	76	156	114	78	112	117	94	62	64	0	0	1	0	0	0	1	2	30	0	0	0	13	96	26	98	18	217	102	12	94	12	38	2	mature_unique
rno-miR-142-5p	1555	1016	865	1013	1871	1150	305	1276	1565	631	450	551	2	1	0	1	1	1	4	15	114	0	0	0	106	512	288	449	177	1492	883	145	271	63	274	3	mature_unique
rno-miR-143-3p	75871	73806	97910	39590	90268	77928	71615	156696	106958	52462	60203	49329	29	41	21	26	37	60	27	22	106	20	1834	17	617	4659	890	10585	1756	8123	7251	1477	6141	889	1827	2314	mature_unique
rno-miR-143-5p	35	25	24	23	23	26	15	34	35	15	13	20	0	0	0	0	0	0	0	0	0	0	0	0	0	0	0	3	0	1	1	0	0	0	0	1	mature_unique
rno-miR-144-3p	88	65	49	104	219	59	13	73	206	20	11	18	0	0	0	0	0	0	2	13	65	0	0	0	12	7	17	10	16	162	43	15	21	5	11	0	mature_unique
rno-miR-144-5p	26	53	55	80	83	68	21	66	98	17	11	13	0	0	0	0	0	0	0	7	50	0	0	0	61	62	104	15	53	288	171	33	47	25	50	5	mature_unique
rno-miR-145-3p	149	106	81	164	119	81	97	121	111	38	37	45	0	0	0	0	0	1	0	0	0	0	24	0	1	3	2	4	1	6	8	2	2	1	2	0	mature_unique
rno-miR-145-5p	2780	392	377	1208	1965	422	792	831	403	335	300	300	0	0	0	0	0	0	0	0	1	0	0	6	43	74	49	138	71	104	171	46	29	26	33	19	mature_unique
rno-miR-146a-5p	3054	2679	2226	4567	3114	3625	2434	3427	4194	2395	1376	1546	3	3	3	1	1	4	3	2	9	5	0	0	123	394	120	427	143	440	760	206	121	103	160	130	mature_unique
rno-miR-146b-5p	3077	2262	4037	1031	626	960	2369	975	919	2821	2300	2277	10	3	22	13	14	22	9	15	58	5	82	3	64	363	77	459	67	274	473	70	98	21	83	31	mature_unique
rno-miR-147	11	12	16	1	3	4	9	5	7	3	4	3	0	0	0	0	0	0	0	0	0	3	0	0	2	2	3	3	1	9	5	1	5	2	2	0	mature_unique
rno-miR-148b-3p	1779	1199	1403	1665	1492	1427	1436	2168	1773	822	665	589	12	5	12	34	16	33	17	6	34	9	0	1	14	144	70	134	36	116	223	29	53	20	46	3	mature_unique
rno-miR-148b-5p	97	62	68	148	122	114	33	121	103	40	46	31	1	0	2	2	1	2	0	0	3	1	0	0	6	27	11	30	8	28	42	5	8	3	7	5	mature_unique
rno-miR-150-3p	1	3	1	1	1	5	1	0	3	2	3	2	1	1	0	0	0	1	0	0	0	0	0	0	94	154	167	98	246	161	196	113	70	68	97	124	mature_unique
rno-miR-150-5p	1323	172	297	403	3514	341	162	490	485	172	153	173	1	2	0	1	0	3	1	0	21	1	0	0	1151	1517	1777	1898	4153	2299	3131	2257	3003	1412	1891	626	mature_unique
rno-miR-151-3p	5685	6709	6306	10128	6646	6585	7904	13232	9580	4003	3464	4198	371	66	1036	466	283	995	353	242	1038	143	1	58	3152	10361	4633	11198	5577	6057	18555	4010	2168	1700	3905	367	mature_unique
rno-miR-151-5p	3731	2252	2928	4128	5164	2395	1484	4240	4286	1278	1074	1046	23	11	98	83	48	90	50	35	85	33	0	11	237	839	459	478	149	287	1748	196	96	293	583	163	mature_unique
rno-miR-152-3p	387	213	275	444	247	241	272	389	316	144	131	139	2	3	3	4	1	9	2	2	2	3	0	0	22	62	35	43	25	191	125	33	33	29	34	0	mature_unique
rno-miR-152-5p	30	21	29	32	14	20	20	33	32	16	13	18	0	0	0	0	0	0	0	0	1	0	0	0	6	11	6	15	8	31	32	10	13	13	3	3	mature_unique
rno-miR-155-5p	28	21	22	11	7	8	35	8	9	15	2	6	0	0	0	0	0	0	0	0	0	0	0	0	0	1	1	1	0	0	3	0	0	0	1	0	mature_unique
rno-miR-15b-3p	30	20	22	65	25	15	22	30	28	20	19	21	1	0	1	0	0	0	0	0	2	0	0	0	6	14	4	23	4	20	9	3	4	3	1	0	mature_unique
rno-miR-15b-5p	1251	481	671	824	1379	538	306	831	793	312	255	244	10	8	23	6	8	14	23	8	41	10	0	4	104	193	111	248	104	587	537	88	149	106	112	6	mature_unique
rno-miR-16-3p	5	5	3	2	9	2	4	6	10	5	3	5	0	0	0	0	0	0	0	1	3	2	0	0	0	4	0	9	2	6	6	1	2	1	0	0	mature_unique
rno-miR-16-5p	8374	7449	9073	11720	10822	9575	4116	10608	13189	5509	3588	3282	253	24	563	165	119	186	221	181	960	90	0	34	3691	7860	3665	13144	4461	13407	16830	3465	1388	1946	3161	52	mature_unique
rno-miR-17-1-3p	21	18	18	20	7	11	15	17	16	17	8	5	0	0	0	0	0	0	0	0	1	0	0	0	1	9	4	16	1	9	15	1	2	1	1	0	mature_unique
rno-miR-17-5p	246	180	225	429	203	169	169	291	228	216	150	164	4	2	3	5	0	9	8	1	10	0	0	0	100	540	140	709	130	373	647	89	61	27	165	6	mature_unique
rno-miR-181a-1-3p	121	142	189	192	140	177	107	208	207	86	77	69	1	0	0	1	6	3	2	1	8	0	0	1	25	74	39	67	21	50	148	29	34	30	53	62	mature_unique
rno-miR-181a-2-3p	35	49	80	29	68	56	29	63	79	26	20	19	1	0	1	2	4	5	0	0	8	0	0	0	10	24	10	34	24	24	49	22	24	12	11	14	mature_unique
rno-miR-181a-5p	20456	25719	45804	32158	32598	38225	17395	45065	46875	19546	14505	13751	344	237	1063	787	897	777	400	287	1934	215	112	116	8452	20177	11939	16436	9443	15337	37533	10267	7993	10079	13576	2171	mature_unique
rno-miR-181b-1-3p	4	3	6	5	4	11	1	11	7	3	6	1	0	0	0	0	0	0	0	0	0	0	0	0	0	0	0	1	0	3	0	0	1	1	0	0	mature_unique
rno-miR-181b-5p	1212	1518	3045	1683	1939	2110	969	2389	2869	1161	843	821	37	28	173	70	89	82	54	33	173	32	0	14	947	2550	1051	1473	686	1020	3660	538	735	590	1523	1124	mature_unique
rno-miR-181c-3p	121	138	177	192	145	166	135	254	236	71	75	68	0	2	2	3	3	3	0	1	12	0	0	0	69	474	144	412	81	202	640	89	207	29	127	141	mature_unique
rno-miR-181c-5p	1985	2440	3651	5225	2615	2806	1273	5192	3992	1855	1403	1392	8	6	15	28	22	17	11	14	97	15	2	1	436	2786	832	2339	482	1158	3175	463	590	253	786	23	mature_unique
rno-miR-181d-5p	309	420	519	491	338	393	267	679	532	287	193	219	0	0	2	2	4	2	1	4	13	1	0	0	216	1405	494	947	340	413	1456	201	343	131	451	457	mature_unique
rno-miR-182	808	1334	1347	5087	2458	3001	775	4136	4127	961	733	737	213	78	1102	451	279	505	272	111	532	117	17	48	244	333	295	18	8	23	1733	10	8	229	460	1050	mature_unique
rno-miR-183-3p	16	12	10	18	28	8	3	15	10	2	4	3	0	1	2	4	2	5	0	0	4	1	0	0	6	20	7	0	0	0	53	0	0	13	11	3	mature_unique
rno-miR-183-5p	322	341	278	1678	678	510	231	929	754	183	120	162	44	8	281	154	49	299	97	32	159	20	0	25	98	74	70	3	2	3	488	2	1	54	127	28	mature_unique
rno-miR-1839-3p	25	11	19	72	32	9	20	30	29	8	7	10	1	1	2	0	0	0	0	0	0	1	0	0	0	2	2	4	2	5	7	1	0	1	6	0	mature_unique
rno-miR-1839-5p	230	233	321	412	273	271	180	313	332	158	135	123	42	11	38	13	13	5	13	2	22	25	0	6	84	250	156	84	43	100	590	28	81	169	270	99	mature_unique
rno-miR-184	8	47	36	46	40	291	18	18	140	101	12	3	61	7	31	99	14	42	14	95	26	90	0	5	0	2	1	15	0	14	0	2	17	9	0	3	mature_unique
rno-miR-1843-3p	11	7	6	5	9	2	13	20	8	8	7	4	2	1	3	1	2	5	0	1	3	3	0	1	17	41	44	9	4	5	117	7	5	25	36	69	mature_unique
rno-miR-1843-5p	60	60	94	113	104	69	36	137	131	40	29	31	7	1	16	4	4	3	3	4	10	1	1	0	6	33	13	39	6	16	66	13	15	9	28	2	mature_unique
rno-miR-185-5p	63	42	35	105	44	35	60	83	44	25	20	26	0	0	0	0	1	0	1	0	0	1	0	0	0	2	2	3	2	4	9	0	3	2	3	2	mature_unique
rno-miR-186-5p	6396	5012	5723	7295	8826	8476	2735	10349	8861	4014	3473	3577	313	39	521	309	220	420	198	134	501	104	0	57	1599	4712	1733	4129	961	2207	6580	1102	501	499	1618	117	mature_unique
rno-miR-187-3p	12	10	13	9	4	4	16	8	7	4	6	7	1	0	0	0	0	0	0	0	0	0	0	0	1	5	6	3	3	5	8	2	2	3	3	1	mature_unique
rno-miR-188-5p	44	30	73	39	53	47	32	61	47	39	28	34	1	1	5	0	0	3	0	0	1	1	0	0	36	84	48	102	34	111	152	49	85	50	56	48	mature_unique
rno-miR-18a-3p	3	2	1	1	2	2	4	5	2	2	1	6	0	0	2	0	0	0	0	0	3	1	0	0	19	35	28	32	26	34	57	11	24	22	24	5	mature_unique
rno-miR-18a-5p	85	20	17	28	10	8	73	12	7	25	19	21	0	0	0	0	0	0	0	0	1	0	0	0	7	28	3	18	7	18	17	3	5	3	10	0	mature_unique
rno-miR-190a-5p	174	38	32	48	168	27	19	75	58	37	22	15	0	1	0	0	0	0	0	0	1	0	0	0	0	0	0	0	0	0	0	0	0	0	0	0	mature_unique
rno-miR-190b-5p	25	15	10	20	15	19	20	21	20	14	8	12	0	0	0	0	0	0	1	1	0	0	0	1	0	0	0	0	0	0	0	0	0	0	0	0	mature_unique
rno-miR-191a-3p	55	34	39	48	58	40	15	52	54	17	21	27	0	0	3	3	1	1	2	0	4	0	0	0	26	100	28	80	16	64	120	23	24	12	44	4	mature_unique
rno-miR-191a-5p	33904	35355	38324	126014	42461	48064	31907	72728	59804	27721	19653	21740	852	254	2991	2371	1134	4376	1401	695	4477	305	147	331	82170	408696	126060	436385	136487	188611	577253	106457	42345	19917	112907	8158	mature_unique
rno-miR-191b	6	3	2	2	5	1	0	3	5	0	2	4	0	0	0	0	1	0	0	0	1	0	0	0	12	49	11	47	8	32	64	8	16	0	21	0	mature_unique
rno-miR-192-3p	57	30	28	116	52	33	53	83	48	27	16	13	2	0	1	4	0	2	0	1	3	0	0	1	1	4	12	1	0	1	25	0	0	3	12	3	mature_unique
rno-miR-192-5p	160137	156735	208756	414000	232013	176581	104069	385254	280463	94968	75292	68097	6788	2017	13704	8770	6244	10938	9134	2977	15420	2795	879	1292	34683	40492	34460	11862	3306	14343	221631	4289	4407	31687	63191	10459	mature_unique
rno-miR-193-3p	502	131	173	311	549	157	226	292	150	65	68	67	5	0	3	5	2	3	8	6	7	5	0	1	71	75	79	58	49	122	203	38	48	85	52	25	mature_unique
rno-miR-194-3p	28	35	30	44	36	39	22	41	41	11	10	24	2	0	6	2	2	0	2	0	2	1	0	0	1	0	1	1	0	1	10	2	0	1	6	2	mature_unique
rno-miR-194-5p	2799	2388	2929	4714	4230	2757	1155	4288	4336	1461	1002	808	86	34	292	157	137	126	124	83	256	64	0	22	5	12	11	13	1	13	59	2	2	3	12	0	mature_unique
rno-miR-195-3p	38	34	50	51	38	48	28	57	55	29	27	25	0	0	0	0	0	0	0	0	1	0	0	0	3	8	3	12	4	15	16	7	9	3	3	5	mature_unique
rno-miR-195-5p	1087	433	335	732	968	370	453	602	489	249	219	245	0	0	0	0	0	1	0	0	0	0	0	0	0	3	1	9	1	11	7	0	0	3	2	0	mature_unique
rno-miR-196a-3p	18	15	20	16	17	18	5	33	25	11	8	7	0	0	0	0	0	1	0	0	0	0	0	0	0	0	0	0	0	2	1	0	0	0	1	0	mature_unique
rno-miR-196a-5p	398	285	374	368	297	262	396	374	389	202	189	169	0	0	7	4	2	6	1	0	4	0	0	0	0	0	0	0	0	0	2	1	0	0	0	0	mature_unique
rno-miR-196b-3p	14	12	5	14	5	7	13	7	9	2	7	4	0	0	0	0	1	2	1	1	1	0	0	0	0	1	0	1	0	0	0	0	0	0	0	0	mature_unique
rno-miR-196b-5p	769	684	776	470	815	743	748	992	906	474	379	367	3	5	20	27	30	32	6	4	42	2	0	3	1	24	10	9	3	4	10	0	3	5	12	1	mature_unique
rno-miR-196c-3p	14	5	3	10	9	6	8	10	23	5	5	4	3	0	0	0	1	0	0	0	0	0	0	0	0	0	0	0	0	0	0	1	0	0	1	0	mature_unique
rno-miR-196c-5p	6	5	2	2	1	4	15	6	2	6	5	3	0	0	0	1	0	0	0	0	0	0	0	0	0	0	0	0	0	0	0	0	0	0	0	0	mature_unique
rno-miR-199a-3p	2954	2368	2981	3413	2817	2668	1744	3127	3801	1489	1414	1454	1	1	3	1	1	2	1	1	5	4	0	1	59	238	92	512	159	919	670	262	199	234	170	9	mature_unique
rno-miR-199a-5p	1050	777	658	1350	820	1007	836	1086	1240	531	367	493	1	0	0	0	0	1	1	0	0	1	0	1	5	19	3	37	9	52	45	25	14	20	20	2	mature_unique
rno-miR-19a-3p	61	44	49	41	30	41	47	88	31	67	37	49	0	0	4	2	2	3	5	1	7	1	0	0	2	19	9	34	7	76	16	4	20	2	5	0	mature_unique
rno-miR-19b-3p	354	356	324	579	274	339	296	565	310	362	245	270	17	2	12	3	3	7	17	6	17	9	0	10	6	129	36	186	41	278	116	21	140	8	35	11	mature_unique
rno-miR-200a-3p	1200	1049	1404	1683	1368	1005	863	1966	1507	660	503	500	25	25	56	80	59	139	55	37	73	44	0	12	16	27	28	5	8	21	132	3	5	23	35	0	mature_unique
rno-miR-200a-5p	90	79	173	192	127	128	49	222	195	72	56	67	8	6	4	12	9	5	4	1	9	1	0	1	2	2	0	0	0	0	7	0	0	2	6	2	mature_unique
rno-miR-200b-3p	1046	917	834	1484	1362	1056	646	1471	1504	523	395	385	21	40	77	122	46	235	23	25	79	35	0	7	0	0	0	0	1	1	0	0	1	0	3	2	mature_unique
rno-miR-200b-5p	36	39	20	67	61	45	35	64	60	20	16	23	4	0	5	5	1	6	2	1	1	1	0	0	3	4	7	0	0	0	15	1	0	3	6	2	mature_unique
rno-miR-200c-3p	51	41	33	71	41	31	34	47	59	11	14	24	0	0	0	0	1	5	2	2	0	0	0	0	1	1	0	0	0	1	0	0	0	0	1	0	mature_unique
rno-miR-201-3p	26	3	6	4	22	3	7	9	6	1	5	2	0	0	0	0	0	0	0	0	0	1	0	0	0	0	0	0	0	0	0	0	0	0	0	0	mature_unique
rno-miR-201-5p	95	104	77	131	147	122	46	251	180	66	53	48	1	6	0	5	1	3	3	2	7	2	0	0	0	0	0	0	0	3	1	1	0	0	0	0	mature_unique
rno-miR-203a-3p	845	926	981	2283	1246	1102	684	2120	1655	481	490	433	112	45	232	163	108	121	113	66	239	106	0	21	196	393	324	48	29	99	1364	31	45	358	507	43	mature_unique
rno-miR-203a-5p	36	26	32	28	43	31	15	63	45	15	19	16	2	1	2	1	0	0	5	1	5	2	0	2	6	11	12	1	0	0	45	0	0	4	16	33	mature_unique
rno-miR-203b-3p	181	160	143	243	194	171	157	439	258	91	77	79	13	5	21	18	3	20	18	10	31	9	0	2	12	13	19	1	0	1	62	0	1	7	20	36	mature_unique
rno-miR-203b-5p	194	242	289	392	271	206	148	471	371	98	120	90	65	16	86	29	23	28	49	20	72	69	0	7	178	376	305	23	17	67	1261	21	28	322	464	43	mature_unique
rno-miR-204-3p	0	0	1	1	0	0	2	0	0	0	0	1	0	0	0	0	0	0	0	0	0	0	0	0	5	7	7	0	1	0	7	0	0	5	10	4	mature_unique
rno-miR-204-5p	339	222	213	489	363	242	267	474	315	157	106	103	6	6	24	18	37	18	4	6	29	2	0	2	0	1	2	0	2	3	6	1	1	0	0	0	mature_unique
rno-miR-205	63	58	70	120	79	155	60	173	65	55	119	129	26	25	29	23	12	19	30	12	30	47	0	1	47	42	55	36	62	71	163	71	31	65	70	11	mature_unique
rno-miR-208a-3p	0	0	0	0	0	0	0	0	0	0	0	0	0	0	0	0	0	0	1	0	0	0	0	0	0	0	0	0	1	5	0	3	2	1	1	1	mature_unique
rno-miR-208b-3p	0	0	0	0	0	0	0	0	0	0	0	0	0	0	0	0	0	0	0	0	0	0	0	0	2	3	3	3	1	29	7	8	1	3	2	0	mature_unique
rno-miR-20a-5p	140	67	63	97	59	37	96	89	52	81	43	61	1	0	1	1	1	0	2	1	3	1	0	1	7	91	15	96	12	93	121	20	27	7	31	1	mature_unique
rno-miR-20b-5p	6	2	2	3	3	5	5	8	6	4	0	6	0	0	0	0	0	0	0	0	0	0	0	0	0	4	0	7	2	1	9	3	0	1	3	0	mature_unique
rno-miR-210-3p	70	69	107	115	91	81	103	161	117	36	55	50	8	1	14	4	2	1	11	0	11	4	0	2	92	495	184	484	130	402	688	148	196	125	198	90	mature_unique
rno-miR-211-3p	0	0	0	0	0	0	0	0	0	0	0	0	0	0	0	0	0	0	0	1	0	0	0	0	3	38	9	10	9	12	0	3	5	2	2	0	mature_unique
rno-miR-212-3p	20	10	18	4	2	5	14	7	2	8	8	9	0	0	0	0	0	0	0	0	0	0	0	0	3	22	5	12	8	9	17	6	3	5	4	2	mature_unique
rno-miR-21-3p	2232	1476	2237	35	746	589	704	1046	832	1512	1181	1362	6	1	11	3	15	13	19	3	30	20	0	5	54	207	87	150	27	171	392	35	45	43	101	51	mature_unique
rno-miR-214-3p	60	28	45	102	51	39	61	74	65	33	23	35	0	0	0	0	0	0	0	0	0	0	0	0	16	28	23	44	20	49	99	35	11	23	19	5	mature_unique
rno-miR-215	14	12	16	31	20	7	11	30	34	9	8	4	19	39	3	5	1	1	1	0	4	14	0	0	519	1404	776	1988	1183	3934	3626	1548	1545	665	1021	584	mature_unique
rno-miR-21-5p	36520	32057	51424	22819	14780	17893	26719	21079	18313	32357	21733	20471	189	196	551	551	437	655	368	213	932	345	131	99	296	2953	984	3136	529	3632	4145	486	1632	403	1140	120	mature_unique
rno-miR-218a-1-3p	5	4	4	19	14	9	8	16	15	7	2	6	2	0	0	1	1	1	1	0	0	0	0	0	3	6	8	0	0	0	25	0	0	2	6	0	mature_unique
rno-miR-218a-5p	110	96	119	233	116	105	87	211	149	80	58	54	1	0	3	0	1	1	2	0	2	0	0	1	1	0	0	1	0	1	5	0	0	0	1	0	mature_unique
rno-miR-218b	7	7	7	4	7	5	3	12	10	4	5	5	0	0	2	0	0	0	1	0	0	0	0	0	0	0	0	0	0	0	2	0	0	0	1	0	mature_unique
rno-miR-219a-1-3p	4	5	6	5	1	6	0	8	1	2	4	2	1	0	0	1	0	0	0	0	0	1	0	0	7	14	13	6	3	8	18	8	6	3	8	18	mature_unique
rno-miR-219a-2-3p	4	3	2	4	7	6	2	10	6	1	1	1	2	1	4	1	0	1	0	1	2	0	0	0	3	17	19	0	0	0	41	0	0	11	15	29	mature_unique
rno-miR-219a-5p	15	5	9	14	0	5	13	9	9	5	9	4	0	0	0	0	0	1	1	0	0	0	0	0	0	2	2	0	0	0	7	0	1	3	5	0	mature_unique
rno-miR-219b	1	0	0	1	3	0	1	5	0	0	0	1	0	0	2	0	0	0	0	0	0	0	0	0	7	21	20	1	0	1	51	0	0	14	19	31	mature_unique
rno-miR-221-3p	914	721	562	802	399	390	819	658	469	607	421	556	29	1	27	5	2	17	16	8	17	13	0	2	108	430	168	329	98	391	738	108	49	138	189	0	mature_unique
rno-miR-221-5p	67	34	26	19	36	25	27	34	26	38	19	21	0	0	1	0	0	3	0	1	0	0	0	0	0	1	0	1	0	1	0	2	0	0	0	1	mature_unique
rno-miR-222-3p	479	462	475	215	301	266	350	287	399	412	258	333	9	10	26	11	4	9	12	4	11	5	0	1	18	34	39	28	9	49	58	21	11	23	32	8	mature_unique
rno-miR-223-3p	148	89	85	79	82	75	32	79	73	57	48	32	1	0	0	0	0	2	1	2	14	0	0	0	129	705	209	802	173	575	903	245	147	63	255	4	mature_unique
rno-miR-223-5p	9	7	6	1	5	13	5	5	3	8	2	5	0	1	0	0	0	0	0	0	0	0	0	0	15	156	51	145	38	55	159	18	17	9	49	51	mature_unique
rno-miR-22-3p	108463	111693	134757	88311	135247	128414	83851	146813	176691	66523	55966	51117	9167	2114	18807	8865	7814	7959	15130	3343	14130	7498	1168	2101	18682	66646	32795	49691	18776	47187	130938	21356	9113	22616	34607	1706	mature_unique
rno-miR-224-5p	3	8	2	4	2	2	1	4	5	1	1	4	0	0	0	0	0	0	0	0	0	0	0	0	2	14	9	22	11	42	45	18	3	36	6	0	mature_unique
rno-miR-22-5p	52	33	25	65	40	27	43	49	21	13	15	11	0	0	3	1	1	3	2	0	0	1	0	2	17	63	45	13	8	14	162	12	6	28	39	2	mature_unique
rno-miR-23a-3p	1336	500	565	1255	1219	523	394	828	663	427	367	309	12	3	5	2	8	3	3	5	7	1	0	1	122	497	178	469	144	356	751	155	82	113	188	30	mature_unique
rno-miR-23b-3p	2023	1464	1606	3118	1801	1172	894	2491	1475	1162	970	864	6	4	11	38	55	46	7	24	51	4	0	0	7	31	17	25	9	36	70	13	4	20	21	2	mature_unique
rno-miR-24-1-5p	79	6	3	14	73	13	5	5	4	3	2	1	0	0	0	0	0	0	0	0	0	0	0	0	0	0	0	0	0	1	0	0	0	0	0	0	mature_unique
rno-miR-24-2-5p	1521	261	313	208	1360	240	162	261	317	182	128	144	0	0	2	5	4	3	4	1	7	2	0	0	47	222	59	176	46	332	337	58	93	54	94	10	mature_unique
rno-miR-24-3p	1850	1350	1168	3348	1494	1213	1637	2394	1754	842	718	825	7	2	9	8	7	34	15	7	14	5	0	3	97	620	175	501	117	382	777	191	136	202	205	143	mature_unique
rno-miR-25-3p	2493	2102	3003	3039	2395	2069	2087	3963	3406	1776	1431	1530	211	38	313	108	73	96	168	81	412	166	0	38	7300	12853	7499	17894	8744	14953	25951	8135	6375	7007	5337	6977	mature_unique
rno-miR-25-5p	4	1	6	6	5	1	5	2	8	4	2	0	0	0	0	0	0	0	1	1	1	0	0	0	14	13	11	13	18	13	17	5	11	7	6	6	mature_unique
rno-miR-26a-3p	52	29	31	59	29	44	26	59	46	17	30	8	0	0	0	0	1	1	0	0	1	0	0	0	0	0	0	2	0	1	2	0	0	0	0	0	mature_unique
rno-miR-26a-5p	27883	20995	24717	39747	47663	28385	11957	38082	36860	12876	14899	12135	218	101	1027	1077	949	1057	501	477	1324	127	9	76	1086	5366	1833	4847	880	2827	8238	917	543	504	1858	82	mature_unique
rno-miR-26b-3p	66	27	67	77	115	51	43	57	56	22	21	16	4	0	11	6	2	8	4	0	5	1	0	0	7	26	11	30	7	18	35	7	20	1	14	17	mature_unique
rno-miR-26b-5p	2732	2823	3550	5715	3778	3243	1469	5715	4476	1862	1721	1552	42	23	150	115	106	130	64	33	165	19	0	2	51	313	84	307	56	276	417	49	92	44	104	8	mature_unique
rno-miR-27a-3p	1730	683	875	1296	1241	650	570	1082	1018	479	447	440	13	1	9	8	4	8	10	8	16	10	1	1	121	897	236	712	129	793	974	194	157	122	217	19	mature_unique
rno-miR-27a-5p	26	21	24	9	12	7	27	10	21	30	9	10	0	1	1	0	0	0	0	0	0	0	0	0	4	30	19	10	20	29	53	6	3	16	19	0	mature_unique
rno-miR-27b-3p	16212	14721	21480	17082	23997	15727	8628	25752	23694	9588	8749	7765	99	80	302	517	483	470	209	174	735	107	24	34	397	1577	612	2187	654	3319	3160	927	737	639	649	45	mature_unique
rno-miR-27b-5p	39	32	66	37	45	46	32	54	58	29	28	25	1	0	0	2	1	3	0	1	3	0	0	0	1	2	1	3	0	1	3	0	1	0	2	0	mature_unique
rno-miR-28-3p	3453	3935	4606	4774	5419	5855	2440	9513	8003	3484	2315	2426	223	94	827	367	271	553	243	147	478	134	0	52	1476	5299	2494	3828	1804	2057	8780	1423	1167	1484	2743	1827	mature_unique
rno-miR-28-5p	507	358	599	548	575	398	320	550	662	216	196	188	5	5	32	16	19	14	5	6	28	3	0	1	15	106	27	115	21	70	161	28	25	15	56	0	mature_unique
rno-miR-298-5p	0	1	3	0	3	4	1	1	0	2	0	2	0	0	0	1	0	0	0	0	1	0	0	0	25	25	24	22	40	26	51	24	25	15	20	14	mature_unique
rno-miR-29a-3p	4030	2256	2005	3466	4258	1809	2979	3182	3179	1351	1309	1335	236	20	182	78	68	70	202	40	70	112	1	23	280	957	621	485	143	891	2546	238	139	391	667	60	mature_unique
rno-miR-29a-5p	24	8	8	22	6	14	12	19	12	5	6	9	0	0	1	0	0	2	0	0	4	0	0	0	0	3	0	0	1	1	0	0	2	0	2	0	mature_unique
rno-miR-29b-2-5p	5	3	11	29	10	9	9	10	10	3	3	5	0	0	0	0	0	0	0	0	0	0	0	0	3	2	1	1	0	1	4	0	0	1	5	0	mature_unique
rno-miR-29b-3p	291	110	146	181	224	104	101	193	155	69	66	67	0	0	5	1	1	2	4	1	1	3	0	0	2	9	4	1	1	7	19	1	1	4	4	2	mature_unique
rno-miR-29c-3p	875	453	460	677	968	479	333	730	694	197	236	197	14	7	29	10	12	16	33	7	16	21	0	3	12	75	31	39	10	66	183	13	23	46	58	18	mature_unique
rno-miR-29c-5p	35	21	17	80	26	26	35	35	32	8	4	17	1	0	0	0	0	0	3	1	1	2	0	0	0	2	2	1	1	2	5	5	0	2	1	0	mature_unique
rno-miR-300-3p	9	16	14	22	17	8	14	21	14	8	11	6	0	0	0	0	0	0	1	0	0	0	0	0	9	11	9	11	6	8	43	10	2	16	17	0	mature_unique
rno-miR-301a-3p	1136	1086	1544	2026	1384	1819	336	2362	1833	980	657	593	1	1	11	8	13	13	5	9	44	3	0	6	81	377	178	418	151	685	467	108	127	62	153	2	mature_unique
rno-miR-301b-3p	4	1	4	19	9	3	1	10	3	9	5	3	0	0	0	0	0	0	0	0	0	0	0	0	6	28	10	30	7	29	59	6	16	4	8	1	mature_unique
rno-miR-3065-5p	44	49	49	53	45	46	22	82	53	26	28	17	0	0	0	0	0	0	0	0	0	0	0	0	1	1	3	1	0	1	1	0	0	0	0	0	mature_unique
rno-miR-3068-3p	224	231	293	314	353	320	97	392	439	188	141	111	5	3	22	10	13	6	7	5	14	3	0	3	33	76	43	45	13	52	173	24	22	36	96	11	mature_unique
rno-miR-3068-5p	7	3	5	13	2	6	3	10	8	2	3	0	0	0	0	0	0	0	0	1	0	1	0	0	0	0	0	0	0	0	1	0	0	0	0	0	mature_unique
rno-miR-3085	1	0	2	0	0	0	2	2	0	0	0	0	0	0	0	1	0	0	0	0	0	0	0	0	8	2	5	0	0	0	19	1	0	8	11	5	mature_unique
rno-miR-30a-3p	919	1002	1481	399	1066	1067	898	1685	1540	627	562	569	66	19	135	65	65	78	56	46	92	22	0	7	67	176	66	236	56	145	447	101	72	71	114	272	mature_unique
rno-miR-30a-5p	75162	80636	93652	156060	105307	90749	57556	150046	123578	51042	42261	39812	2352	803	4645	2783	3090	3052	2645	1330	6195	1774	332	578	3903	10265	4772	10919	3626	7541	23259	4095	5255	4601	7029	1261	mature_unique
rno-miR-30b-3p	29	24	31	41	16	33	40	42	37	25	14	20	0	0	0	2	1	2	0	0	4	0	0	0	0	2	2	3	1	0	3	0	1	3	1	0	mature_unique
rno-miR-30b-5p	4274	1188	1859	2866	8089	1380	1143	2695	1903	930	774	723	22	16	69	76	43	127	67	36	69	33	71	3	139	607	229	774	194	504	1285	219	346	164	317	87	mature_unique
rno-miR-30c-1-3p	131	105	134	97	211	172	90	162	225	70	45	51	2	1	9	8	4	14	2	1	15	0	0	0	5	22	10	18	10	21	34	6	6	7	13	3	mature_unique
rno-miR-30c-2-3p	295	308	539	144	365	356	512	519	499	236	212	192	9	3	39	28	35	29	5	5	59	8	0	1	21	46	24	47	15	26	81	19	25	20	26	28	mature_unique
rno-miR-30c-5p	15178	6511	7575	17026	24477	10255	6182	14136	14463	4769	3597	3518	129	85	629	323	377	430	206	211	368	105	1	44	687	2160	878	2331	649	971	3414	474	545	344	1038	174	mature_unique
rno-miR-30d-3p	129	130	180	152	178	155	57	174	222	78	72	73	0	0	4	3	5	6	1	4	4	1	0	0	0	4	3	8	3	5	11	0	4	1	3	0	mature_unique
rno-miR-30d-5p	12806	13464	15825	25681	18901	16569	11687	23770	20163	8067	6944	7002	514	150	987	656	522	747	387	293	857	228	364	75	2748	10152	4768	8090	3737	4060	19607	3351	1636	1863	4279	444	mature_unique
rno-miR-30e-3p	828	1020	1546	326	1309	1237	631	1763	1855	558	505	486	29	11	61	34	57	50	34	27	68	4	0	5	48	184	62	220	54	167	296	52	93	37	83	174	mature_unique
rno-miR-30e-5p	17703	16260	16211	28441	27213	22257	10223	29567	25944	9174	7239	6862	220	119	388	419	560	458	463	297	1037	288	128	125	499	2636	945	2764	604	1961	3108	548	592	323	853	57	mature_unique
rno-miR-3102	9	2	4	10	5	11	6	12	14	5	4	2	0	0	1	0	0	2	0	0	0	0	0	0	1	5	4	1	0	1	9	1	0	3	5	0	mature_unique
rno-miR-3120	4	3	12	5	3	4	6	3	8	0	2	5	0	0	0	0	0	0	0	0	0	0	0	0	0	2	2	2	0	9	4	0	0	1	1	0	mature_unique
rno-miR-31a-5p	87	86	138	75	85	77	75	93	78	81	52	62	4	0	4	3	4	9	5	0	7	0	0	0	2	10	2	70	11	19	16	5	6	2	8	1	mature_unique
rno-miR-320-3p	413	440	377	476	325	308	588	573	440	232	247	294	109	22	176	17	21	47	89	27	107	86	0	21	4817	8547	7867	3689	3336	4276	17310	2499	2565	6297	6400	17259	mature_unique
rno-miR-322-3p	173	106	224	162	302	150	72	189	199	99	94	83	0	1	2	4	7	7	0	2	6	0	0	1	93	216	115	278	135	351	410	181	99	195	170	8	mature_unique
rno-miR-322-5p	715	612	844	701	997	973	208	881	963	666	403	307	2	0	0	8	2	3	2	1	4	1	0	0	4	44	19	36	10	51	59	5	8	4	14	0	mature_unique
rno-miR-324-3p	34	44	43	39	37	21	27	22	43	20	17	19	3	2	4	3	2	1	1	3	7	2	0	0	54	69	49	65	38	42	175	28	22	26	45	0	mature_unique
rno-miR-324-5p	114	59	41	149	52	44	80	141	55	30	37	53	2	0	1	0	1	1	0	0	3	1	0	0	11	33	20	19	4	23	93	9	7	17	7	9	mature_unique
rno-miR-32-5p	17	7	13	16	11	9	6	22	9	6	6	2	0	0	0	0	1	0	0	1	1	1	0	0	1	1	1	2	0	4	3	0	0	0	0	0	mature_unique
rno-miR-326-3p	41	35	45	67	49	45	91	59	54	24	24	43	13	1	6	3	3	3	4	2	2	3	0	0	69	305	152	145	64	77	384	42	42	42	120	35	mature_unique
rno-miR-328a-3p	358	324	208	330	457	362	434	447	510	166	146	173	47	10	61	24	20	27	19	5	35	26	0	6	1058	2426	1797	1409	1396	930	4166	619	305	503	1469	211	mature_unique
rno-miR-330-3p	16	10	7	19	14	11	8	20	12	2	8	3	0	0	0	0	0	1	1	0	0	0	0	0	32	92	41	58	36	23	176	21	9	17	25	6	mature_unique
rno-miR-330-5p	51	47	37	23	60	35	30	56	53	28	25	27	0	0	1	1	0	0	0	0	2	0	0	0	0	35	16	33	3	14	42	6	5	5	9	3	mature_unique
rno-miR-331-3p	108	50	43	169	70	32	110	130	60	31	22	37	0	1	2	0	2	1	0	0	1	1	0	0	2	9	11	11	3	7	11	8	9	3	3	4	mature_unique
rno-miR-33-3p	18	6	3	17	29	2	2	8	6	4	5	2	0	0	0	0	0	0	0	0	0	2	0	0	1	0	1	3	2	3	3	0	3	0	0	0	mature_unique
rno-miR-335	62	16	21	22	78	22	11	30	30	13	6	16	0	0	0	0	0	0	0	0	0	1	0	0	6	8	9	33	15	86	42	9	27	6	11	12	mature_unique
rno-miR-33-5p	36	27	29	29	47	25	11	47	41	10	14	10	1	0	0	0	0	0	1	1	0	0	0	1	0	0	0	0	0	0	1	0	2	0	1	0	mature_unique
rno-miR-338-3p	47	50	52	59	51	51	25	85	58	27	29	18	0	0	0	0	0	0	0	0	0	0	0	0	1	1	1	1	0	1	2	0	0	0	0	0	mature_unique
rno-miR-339-3p	120	70	115	85	185	71	47	92	124	38	32	33	6	2	16	2	0	3	4	1	3	2	0	0	181	771	296	425	186	321	953	178	181	127	289	127	mature_unique
rno-miR-339-5p	169	125	102	242	140	96	151	220	169	61	64	78	11	0	3	6	1	6	6	6	10	6	0	2	223	864	305	576	217	491	1247	237	180	146	359	27	mature_unique
rno-miR-340-3p	20	9	17	16	28	17	12	27	30	15	7	6	0	0	0	2	1	0	0	0	0	0	0	0	2	12	4	6	2	5	11	1	0	1	5	0	mature_unique
rno-miR-340-5p	37	46	59	50	50	59	27	89	51	30	37	29	0	0	1	0	1	0	1	0	2	1	0	0	0	10	3	12	2	13	9	2	18	1	3	1	mature_unique
rno-miR-341	3	1	0	2	1	1	0	0	0	0	0	0	0	0	0	0	0	0	0	0	0	0	0	0	14	57	56	25	18	31	114	52	34	19	52	151	mature_unique
rno-miR-342-3p	622	159	167	622	458	219	207	313	222	127	83	116	5	0	3	8	0	7	5	0	3	0	0	1	247	462	321	312	289	338	787	190	241	265	320	656	mature_unique
rno-miR-342-5p	11	4	5	13	4	17	7	9	14	5	8	2	0	0	0	1	0	2	0	1	0	0	0	0	15	24	15	24	21	22	45	14	8	4	25	22	mature_unique
rno-miR-345-3p	167	104	104	56	110	100	159	215	103	82	62	81	2	1	6	2	4	10	7	4	8	3	0	1	48	125	82	82	26	87	271	39	41	79	128	151	mature_unique
rno-miR-345-5p	84	23	32	86	60	36	64	78	46	27	23	21	4	1	3	2	1	4	1	5	9	1	0	0	2	5	6	6	4	6	13	1	1	1	4	1	mature_unique
rno-miR-3473	128	57	75	8	27	30	79	27	21	64	67	133	150	185	149	95	41	113	68	6	113	61	0	119	1365	1259	1878	1750	1026	2905	4967	565	992	2067	1517	3527	mature_unique
rno-miR-34a-5p	29	37	30	99	41	60	43	52	50	32	16	25	1	0	1	0	1	4	5	0	1	1	0	0	2	4	0	5	1	3	1	1	0	0	2	0	mature_unique
rno-miR-34b-5p	6	8	12	8	4	4	2	9	2	9	9	9	0	3	0	1	2	0	0	0	3	4	0	1	0	0	0	0	0	0	0	0	0	0	0	0	mature_unique
rno-miR-34c-5p	229	185	267	147	108	127	173	104	112	194	121	155	12	26	3	48	17	27	20	24	63	59	0	9	1	7	1	6	3	4	10	2	2	0	6	0	mature_unique
rno-miR-350	6	6	4	8	5	1	8	5	2	1	1	2	0	0	0	0	0	0	0	0	0	0	0	0	0	0	0	1	0	1	3	0	0	0	0	0	mature_unique
rno-miR-351-5p	2529	1977	2126	1791	2409	2280	2102	2573	2676	1745	1239	1454	3	5	7	25	26	47	2	18	58	1	0	0	107	374	208	317	230	231	540	188	85	69	144	47	mature_unique
rno-miR-3543	0	0	0	1	0	0	2	3	1	1	2	2	0	0	0	0	0	0	0	0	2	0	0	0	58	125	90	79	70	56	323	92	88	96	116	324	mature_unique
rno-miR-3553	298	315	258	1438	629	445	208	813	671	170	110	139	45	8	262	145	46	279	91	28	152	18	0	23	93	71	70	3	2	2	490	3	1	52	126	30	mature_unique
rno-miR-3556a	10	3	2	3	8	2	1	3	2	4	4	2	0	0	0	0	0	0	1	0	0	2	0	0	2	12	7	1	0	1	23	2	0	4	7	0	mature_unique
rno-miR-3556b	923	413	406	372	1114	323	397	528	568	209	212	190	51	6	73	23	13	22	87	8	22	39	0	8	210	616	454	95	46	232	1812	76	33	244	474	62	mature_unique
rno-miR-3557-3p	182	119	89	352	126	117	218	353	132	71	62	72	14	2	9	5	3	5	6	5	8	10	0	1	14	15	10	8	6	8	79	5	2	10	16	2	mature_unique
rno-miR-3557-5p	19226	19881	28163	37651	25549	24955	20136	48659	31801	13698	11685	10800	1727	564	4943	1381	1138	1223	2412	725	2396	1403	230	452	18423	29803	24992	12720	6673	15189	108175	10725	9697	35178	49129	18277	mature_unique
rno-miR-3559-3p	11	12	15	17	11	9	17	15	12	3	9	10	0	0	2	0	0	1	0	0	1	0	0	0	2	16	2	23	7	5	12	8	8	2	3	2	mature_unique
rno-miR-3559-5p	47	43	78	70	52	50	28	96	51	35	38	24	0	0	2	0	1	0	0	4	4	0	0	0	1	8	2	16	1	13	10	2	16	1	2	2	mature_unique
rno-miR-3560	5	6	3	11	4	2	6	1	6	1	0	1	1	0	0	1	0	3	1	0	2	0	0	1	6	3	8	10	6	9	20	4	3	3	5	0	mature_unique
rno-miR-3570	107	127	175	175	122	155	99	184	191	71	71	62	1	0	0	1	3	2	2	1	8	0	0	1	24	70	36	64	23	48	138	29	33	28	49	59	mature_unique
rno-miR-3571	0	0	1	0	0	0	0	0	0	0	0	0	0	0	0	0	0	0	0	0	0	0	0	0	0	1	0	0	1	0	0	0	0	0	1	0	mature_unique
rno-miR-3574	52	61	88	70	70	54	69	117	75	24	34	36	8	1	14	4	2	1	10	0	9	5	0	2	83	470	175	465	122	388	656	141	189	126	178	85	mature_unique
rno-miR-3577	5	4	11	1	9	8	3	7	4	4	0	2	0	0	1	1	1	1	0	0	0	0	0	0	9	10	11	7	8	8	21	8	5	6	11	24	mature_unique
rno-miR-3585-3p	20	2	24	5	30	10	6	19	9	9	6	9	0	1	0	0	0	1	0	0	1	0	0	0	1	0	1	2	3	2	1	2	3	1	0	1	mature_unique
rno-miR-3585-5p	71	86	110	167	129	153	40	296	177	46	53	46	1	3	1	8	1	1	5	0	7	4	0	0	0	2	0	0	0	1	0	0	0	5	0	0	mature_unique
rno-miR-3586-3p	3655	2186	2828	4078	5049	2335	1435	4111	4106	1221	1031	998	13	11	97	84	45	93	43	32	84	23	0	8	146	610	267	428	131	218	1010	158	71	108	298	68	mature_unique
rno-miR-3587	331	125	168	213	258	121	113	218	194	72	77	76	1	0	7	1	1	4	9	1	1	3	0	0	2	10	7	2	1	8	27	1	2	3	7	2	mature_unique
rno-miR-3588	5868	1349	1086	2184	5415	1494	1614	1786	1965	795	523	630	2	0	3	11	8	7	2	3	7	3	0	0	28	30	55	64	47	120	103	91	16	68	21	11	mature_unique
rno-miR-3589	128	28	33	94	164	39	52	70	51	23	19	15	4	0	4	4	2	2	2	2	1	3	0	0	24	59	40	49	19	37	113	15	12	18	36	0	mature_unique
rno-miR-3590-3p	0	0	0	0	0	0	0	1	1	0	0	0	0	0	0	0	0	0	0	0	0	0	0	0	9	8	6	8	4	27	13	7	2	7	1	0	mature_unique
rno-miR-3590-5p	1049	996	2132	1042	1412	1271	621	1498	1699	749	657	626	145	45	445	53	55	46	213	25	91	155	0	35	1928	8624	5215	1466	515	1130	15231	533	473	3363	4587	927	mature_unique
rno-miR-3596a	59760	52935	59888	44183	56427	38616	48943	64666	58712	34719	28836	26475	720	871	4189	2929	2678	2687	1164	1021	4021	654	199	199	4634	36448	12899	15764	5504	13075	41364	3992	8476	4171	18668	2460	mature_unique
rno-miR-3596b	2016	1231	1751	1805	2106	1259	1081	1746	1825	838	741	670	7	15	125	68	76	82	33	23	116	20	0	3	449	2049	970	1431	614	896	2346	412	391	258	790	48	mature_unique
rno-miR-3596c	665	655	690	549	683	471	543	757	733	365	364	341	3	10	52	37	52	50	19	25	56	5	0	1	14	78	49	59	51	82	108	39	48	65	79	12	mature_unique
rno-miR-3596d	918	917	1046	577	1087	532	541	1308	1206	393	531	431	17	7	50	16	22	27	13	10	33	8	0	7	21	98	31	63	32	122	144	25	90	46	65	3	mature_unique
rno-miR-361-3p	22	31	29	47	46	46	30	53	57	24	22	16	5	0	3	1	0	1	1	0	2	0	0	0	8	32	15	41	31	24	64	18	5	10	16	0	mature_unique
rno-miR-361-5p	26	14	12	32	32	15	8	25	20	7	4	6	1	0	3	1	2	2	4	0	1	0	0	0	17	40	23	15	11	22	81	11	1	13	34	0	mature_unique
rno-miR-362-3p	45	29	19	27	26	13	22	34	25	19	10	16	0	1	2	0	0	0	0	1	0	0	0	0	1	3	0	4	4	12	6	2	6	2	2	0	mature_unique
rno-miR-362-5p	24	3	5	5	4	7	5	6	5	2	2	1	0	0	0	1	0	0	0	0	0	0	0	0	0	0	0	0	1	0	1	0	0	0	2	0	mature_unique
rno-miR-363-3p	53	28	37	46	45	45	22	55	57	38	21	16	1	0	0	0	0	0	0	0	2	0	0	0	17	55	18	71	11	59	77	34	14	5	41	1	mature_unique
rno-miR-365-3p	42	8	11	61	32	21	21	35	33	6	6	9	2	1	2	0	0	0	1	2	1	1	0	0	9	8	9	4	2	12	33	8	1	7	5	0	mature_unique
rno-miR-365-5p	2	0	2	3	3	1	0	0	4	2	0	2	1	0	1	1	0	1	1	0	1	0	0	1	18	19	34	1	4	3	66	8	2	12	35	28	mature_unique
rno-miR-374-3p	51	36	26	26	43	40	13	60	51	22	27	16	0	0	0	2	1	0	2	0	1	1	0	0	1	0	0	0	1	0	0	0	1	0	0	0	mature_unique
rno-miR-374-5p	102	36	26	38	55	26	69	32	36	16	18	23	4	0	0	1	1	2	0	1	4	1	0	0	0	4	1	3	1	0	7	0	0	1	2	0	mature_unique
rno-miR-375-3p	11	24	27	91	73	40	16	37	44	20	10	13	25	11	40	14	8	8	8	4	12	20	0	2	102	76	167	19	38	39	393	30	23	135	143	141	mature_unique
rno-miR-378a-3p	26232	27583	37257	56226	37820	37410	27759	71695	47840	19590	16034	14954	2685	816	7184	2130	1704	1895	3391	1015	3374	1855	235	699	25120	36861	31561	17012	8622	19563	141054	13378	11665	42836	60695	29532	mature_unique
rno-miR-378a-5p	209	128	103	392	146	132	238	402	149	76	67	83	14	3	11	5	4	7	5	6	8	10	0	1	14	15	10	8	6	9	77	5	3	11	16	1	mature_unique
rno-miR-378b	8	11	8	12	9	7	6	17	18	10	4	6	1	0	3	0	0	2	1	0	1	1	0	0	4	14	10	6	1	4	42	3	6	14	25	8	mature_unique
rno-miR-379-5p	5	4	5	8	15	4	5	13	6	5	3	3	0	0	0	0	0	0	0	0	0	0	0	0	0	0	0	0	0	0	0	0	0	0	0	0	mature_unique
rno-miR-381-3p	11	11	27	6	15	11	9	17	18	13	6	8	0	0	1	0	0	0	0	0	1	1	24	0	3	14	7	10	6	8	47	11	12	14	20	14	mature_unique
rno-miR-382-3p	0	2	1	3	1	0	1	1	2	0	1	0	0	0	0	0	0	0	0	0	0	0	0	0	1	3	4	3	2	2	2	6	4	0	0	11	mature_unique
rno-miR-382-5p	7	7	11	8	11	6	11	11	11	1	1	4	0	0	0	0	0	0	0	0	0	0	0	0	0	2	1	7	4	0	8	0	0	0	1	0	mature_unique
rno-miR-383-5p	2	6	0	0	0	2	2	2	3	2	0	0	0	0	0	0	0	0	0	0	1	0	0	0	28	365	113	239	40	54	274	29	53	14	104	52	mature_unique
rno-miR-409a-3p	4	10	4	8	8	7	8	12	9	7	4	1	0	0	1	0	0	0	0	0	0	0	0	0	6	13	10	1	4	4	31	6	7	6	11	3	mature_unique
rno-miR-409b	56	51	57	73	49	73	58	90	79	31	20	18	0	0	1	0	0	0	0	0	0	0	0	0	21	26	27	10	22	12	75	19	13	25	27	13	mature_unique
rno-miR-410-3p	37	37	45	24	37	40	44	51	65	20	14	12	0	0	1	1	0	0	0	0	0	0	0	0	10	28	20	21	13	26	86	21	13	18	35	2	mature_unique
rno-miR-411-5p	54	55	109	85	93	60	25	117	134	28	28	22	0	0	0	0	0	1	0	0	0	1	0	0	1	2	0	2	1	2	4	3	0	1	0	1	mature_unique
rno-miR-421-3p	81	94	171	147	182	135	38	177	162	81	58	55	3	2	10	1	2	7	2	1	4	3	0	1	73	174	97	109	54	67	362	38	15	57	131	9	mature_unique
rno-miR-423-3p	379	423	472	40	535	619	267	370	797	225	187	213	56	17	108	17	26	31	60	13	30	41	0	7	4425	5835	6577	2359	3104	2603	16242	1973	1693	3933	6278	2552	mature_unique
rno-miR-423-5p	256	228	354	277	286	477	252	339	424	189	142	128	111	23	334	31	52	56	142	63	51	95	0	23	10983	18859	16955	9464	13819	10802	28550	7380	5221	6982	11697	6015	mature_unique
rno-miR-425-3p	12	9	1	12	14	7	9	7	7	3	4	6	0	0	0	0	2	1	0	1	0	0	0	0	9	24	14	29	5	13	44	8	4	3	16	0	mature_unique
rno-miR-425-5p	381	291	298	430	366	322	211	407	459	181	154	141	19	4	44	15	5	12	9	5	28	14	0	2	547	1510	791	1222	519	645	2572	475	124	239	653	28	mature_unique
rno-miR-429	1080	874	514	1037	1177	714	629	1360	1272	515	409	434	49	30	113	147	50	250	58	34	110	28	0	13	17	18	18	2	2	10	85	5	1	15	41	0	mature_unique
rno-miR-434-3p	0	0	0	1	0	0	0	3	1	1	2	2	0	0	0	0	0	0	0	0	1	0	0	0	53	113	80	67	68	52	290	87	84	91	101	290	mature_unique
rno-miR-449a-5p	11	10	7	4	2	4	7	2	4	8	5	3	2	8	1	8	1	6	1	2	7	1	0	0	0	2	0	0	0	4	1	0	0	1	0	2	mature_unique
rno-miR-450a-5p	73	42	50	70	38	40	45	83	53	34	35	22	0	0	0	1	1	2	0	0	1	0	0	0	1	5	2	10	0	5	13	6	2	1	3	0	mature_unique
rno-miR-451-5p	383	369	254	1206	613	328	535	482	564	93	76	167	0	4	0	1	0	2	5	66	436	0	0	0	775	416	565	848	534	2092	1722	363	368	236	290	35	mature_unique
rno-miR-455-3p	79	57	42	203	93	60	71	105	72	34	19	29	2	0	2	2	0	0	1	3	0	2	0	0	1	3	4	2	0	1	4	1	4	0	0	2	mature_unique
rno-miR-455-5p	28	20	37	55	24	43	14	64	30	14	12	11	1	1	1	0	0	3	1	0	1	0	0	0	1	0	4	15	5	16	6	6	11	4	4	0	mature_unique
rno-miR-466b-2-3p	5	3	0	2	1	1	13	3	2	4	4	5	0	0	0	0	0	0	0	0	1	0	0	0	8	14	8	2	1	5	20	2	0	2	12	2	mature_unique
rno-miR-466c-5p	4	14	7	5	4	9	6	8	4	11	4	3	0	0	0	0	0	0	0	0	0	0	0	0	1	3	1	5	1	1	8	2	0	2	2	0	mature_unique
rno-miR-484	244	21	19	70	316	39	31	49	49	26	22	26	1	0	5	1	0	5	1	1	3	1	0	0	183	248	223	148	192	159	447	92	55	116	124	53	mature_unique
rno-miR-488-3p	0	1	2	5	7	4	2	7	2	4	1	0	0	1	0	0	0	0	0	0	0	0	0	0	0	18	6	31	3	30	23	5	22	1	4	0	mature_unique
rno-miR-489-3p	34	18	23	23	36	14	6	33	26	8	15	17	0	0	0	0	0	0	0	0	1	0	0	0	0	0	0	0	0	2	2	0	0	0	0	0	mature_unique
rno-miR-490-3p	3	2	2	3	0	5	0	2	3	2	1	0	0	0	0	0	0	0	0	0	0	1	0	0	3	8	0	15	10	32	25	39	9	15	9	0	mature_unique
rno-miR-494-3p	8	1	5	2	7	2	4	5	1	2	0	0	1	0	0	0	0	1	0	0	0	1	0	0	6	14	6	7	2	3	17	5	1	10	7	14	mature_unique
rno-miR-496-3p	7	1	3	10	4	7	9	7	6	1	2	0	0	0	0	0	0	0	0	0	0	0	0	0	0	0	0	0	0	1	0	0	0	0	0	0	mature_unique
rno-miR-497-5p	508	194	375	379	1153	281	122	377	463	194	126	145	0	1	0	1	0	0	0	1	0	2	0	0	28	91	29	174	42	242	129	51	126	77	61	2	mature_unique
rno-miR-499-3p	13	10	9	8	15	3	4	11	9	1	3	2	1	0	1	0	0	2	2	0	3	0	0	0	0	0	0	0	0	1	0	0	0	0	0	0	mature_unique
rno-miR-499-5p	27	24	25	50	49	38	13	55	56	11	16	18	1	0	2	1	1	5	1	0	8	1	0	0	0	1	0	0	1	1	2	5	0	2	0	1	mature_unique
rno-miR-500-3p	22	10	3	25	12	7	10	12	10	6	6	5	0	0	0	0	0	0	0	2	2	0	0	0	4	13	3	7	1	11	20	4	2	5	4	1	mature_unique
rno-miR-501-3p	9	8	6	17	6	2	6	5	6	3	0	1	1	0	0	1	0	4	1	0	2	1	0	1	7	4	8	10	6	9	20	5	4	3	5	0	mature_unique
rno-miR-503-3p	48	25	24	17	42	24	18	21	31	12	12	15	0	0	1	1	1	3	0	1	0	0	1	0	7	21	10	15	24	10	29	7	9	13	9	1	mature_unique
rno-miR-504	124	125	138	65	130	112	137	237	191	68	73	74	3	3	19	10	13	14	2	9	12	3	0	1	48	34	74	2	9	4	156	7	4	48	91	17	mature_unique
rno-miR-505-3p	200	19	21	81	247	26	34	53	36	10	11	16	5	0	8	4	3	4	4	5	0	2	0	0	31	43	29	36	16	39	80	16	20	19	37	0	mature_unique
rno-miR-532-3p	29	18	11	25	15	13	26	35	24	15	8	19	0	0	0	0	0	0	0	0	0	0	0	0	19	16	32	32	28	23	78	17	12	21	29	4	mature_unique
rno-miR-532-5p	297	282	333	34	260	321	198	637	418	272	188	191	4	2	6	1	3	2	1	2	5	4	0	0	24	142	47	171	31	150	236	40	96	20	58	90	mature_unique
rno-miR-541-5p	270	236	418	261	306	337	253	364	414	162	122	114	1	0	4	2	2	1	1	1	3	1	0	1	5	6	6	9	3	3	11	1	3	3	1	3	mature_unique
rno-miR-542-3p	169	161	247	216	146	154	114	256	164	185	109	102	0	0	0	3	1	0	0	0	2	0	0	0	1	18	2	8	5	23	21	2	8	2	7	0	mature_unique
rno-miR-542-5p	26	23	39	29	23	21	13	29	44	20	11	11	0	0	0	0	0	0	0	0	0	0	0	0	7	20	23	30	18	31	36	30	21	18	15	5	mature_unique
rno-miR-547-5p	5	12	5	9	16	4	3	19	12	4	4	2	0	0	0	0	0	0	0	0	0	0	0	0	0	0	0	0	0	0	0	0	0	2	0	0	mature_unique
rno-miR-582-3p	65	64	103	6	97	89	83	199	88	48	50	35	0	1	2	2	0	1	0	0	1	0	0	0	7	11	10	32	17	28	57	24	21	13	20	24	mature_unique
rno-miR-582-5p	23	9	12	22	10	7	18	18	10	6	6	8	1	0	0	0	0	0	0	0	0	0	0	0	0	0	0	0	1	0	0	0	0	0	0	0	mature_unique
rno-miR-598-3p	26	19	20	25	17	18	28	42	23	9	7	18	1	1	3	1	1	2	1	0	0	0	0	2	1	0	5	0	2	2	12	3	4	7	8	6	mature_unique
rno-miR-615	10	6	10	0	5	7	3	6	17	6	2	7	0	0	1	0	0	2	0	1	1	0	0	0	1	10	3	3	6	3	9	3	2	4	0	6	mature_unique
rno-miR-6215	24	10	4	0	7	7	9	13	6	1	8	15	0	0	0	0	0	0	0	0	0	0	0	0	1	2	2	1	0	1	6	1	0	1	1	0	mature_unique
rno-miR-6315	2	3	9	1	7	2	4	11	6	4	4	3	0	0	0	0	1	0	0	0	0	0	0	0	2	7	2	2	4	1	16	0	2	0	3	8	mature_unique
rno-miR-6328	3	4	7	0	4	0	5	2	12	4	3	5	0	0	0	0	0	0	0	0	0	0	0	0	62	386	173	219	150	122	375	64	68	29	175	110	mature_unique
rno-miR-6329	64	43	90	32	80	61	36	130	97	37	26	26	3	0	3	2	1	3	2	2	0	0	0	0	6	19	11	26	5	24	56	1	19	5	11	4	mature_unique
rno-miR-652-3p	226	132	112	159	117	75	290	187	112	65	82	88	5	0	5	3	8	10	1	0	16	4	0	0	115	275	151	168	94	151	556	72	16	54	129	7	mature_unique
rno-miR-653-5p	81	50	91	26	94	50	37	93	92	31	29	31	1	0	0	1	0	1	0	0	0	0	0	0	0	1	0	0	0	0	0	0	0	0	0	0	mature_unique
rno-miR-664-2-5p	20	25	21	21	24	19	25	29	37	10	14	9	2	1	2	1	0	2	0	2	1	0	0	0	5	9	10	11	8	9	18	3	1	6	5	4	mature_unique
rno-miR-664-3p	17	19	16	72	31	20	8	43	22	11	9	14	1	0	3	0	0	1	1	2	0	0	0	1	6	12	13	6	3	5	32	5	0	6	12	1	mature_unique
rno-miR-667-3p	10	1	0	6	3	3	5	2	1	2	0	0	0	0	0	0	0	0	0	0	0	0	0	0	0	5	6	0	0	1	4	0	7	1	5	7	mature_unique
rno-miR-671	21	28	29	27	37	34	19	35	44	14	16	16	2	0	2	3	7	4	0	1	7	1	0	0	52	104	67	53	54	41	206	31	25	34	57	53	mature_unique
rno-miR-672-3p	4	3	7	5	7	9	4	6	13	5	0	1	0	0	0	0	0	0	0	0	0	0	0	0	1	3	1	0	0	0	7	0	0	1	4	0	mature_unique
rno-miR-672-5p	77	79	91	63	71	52	108	108	61	65	52	50	3	3	6	9	3	2	3	1	5	2	0	1	1	2	2	0	2	1	5	1	0	0	0	1	mature_unique
rno-miR-674-3p	56	52	44	52	86	33	36	78	81	25	18	22	0	0	3	0	0	0	0	0	3	0	0	0	45	72	71	52	61	52	142	53	16	45	47	5	mature_unique
rno-miR-674-5p	15	10	16	25	19	11	9	20	14	8	4	10	0	0	0	0	0	0	0	0	0	0	0	0	5	3	5	8	5	5	9	3	1	1	2	3	mature_unique
rno-miR-702-3p	14	14	10	13	17	18	17	15	14	11	3	10	2	0	0	0	0	0	0	1	1	0	0	0	4	6	10	6	7	5	23	3	1	3	5	9	mature_unique
rno-miR-708-3p	45	16	45	21	32	24	11	24	29	19	10	11	1	0	0	3	5	0	0	0	1	1	0	0	3	3	2	1	1	5	7	1	1	2	4	2	mature_unique
rno-miR-708-5p	37	19	16	18	10	7	20	13	18	21	7	14	1	0	0	1	2	0	0	0	2	0	0	0	0	0	0	0	0	1	2	0	0	2	0	1	mature_unique
rno-miR-743b-3p	0	0	0	0	1	0	0	0	0	0	2	0	6	6	0	10	2	6	3	1	6	11	0	0	0	0	0	0	0	0	0	0	0	0	0	0	mature_unique
rno-miR-760-3p	3	4	2	3	1	1	4	1	2	0	5	2	0	0	1	1	0	0	0	0	1	0	0	0	13	17	39	9	10	6	47	5	4	13	21	31	mature_unique
rno-miR-7a-1-3p	33	8	8	35	20	25	10	22	26	7	7	4	0	0	1	1	0	2	0	0	2	1	0	1	3	14	4	14	3	5	20	5	1	3	5	0	mature_unique
rno-miR-7a-5p	16	17	6	39	18	15	9	23	24	16	11	5	0	0	0	0	0	0	0	0	0	0	0	0	0	1	0	1	0	1	0	0	0	0	0	0	mature_unique
rno-miR-802-3p	11	22	33	22	24	5	11	19	23	16	8	5	1	0	0	0	0	0	0	0	0	0	0	0	2	2	2	4	1	1	4	2	0	0	0	0	mature_unique
rno-miR-802-5p	69	13	15	24	50	15	1	18	9	8	7	8	2	0	0	0	0	0	0	0	0	0	0	0	0	1	0	5	2	7	5	2	0	2	0	0	mature_unique
rno-miR-872-3p	265	87	176	143	227	116	93	192	132	69	58	63	14	4	28	17	6	6	14	2	16	6	75	1	116	289	110	322	121	155	498	96	228	96	199	143	mature_unique
rno-miR-872-5p	427	386	434	272	483	357	187	482	517	253	237	192	4	5	25	17	22	19	18	11	38	5	0	5	29	262	68	227	39	345	331	23	77	28	93	0	mature_unique
rno-miR-874-3p	133	74	74	87	141	77	97	67	101	22	11	21	1	1	4	5	0	3	1	0	2	1	0	0	21	24	46	18	30	37	85	28	4	5	30	4	mature_unique
rno-miR-874-5p	8	8	14	15	12	13	8	13	26	7	4	8	0	0	2	4	2	3	0	0	2	1	0	1	0	0	2	0	0	0	1	1	0	0	0	0	mature_unique
rno-miR-877	9	4	16	4	10	7	13	5	9	3	6	1	2	2	7	0	0	1	2	1	1	4	0	1	80	220	121	110	79	116	308	49	143	107	172	1090	mature_unique
rno-miR-879-5p	16	19	12	5	17	20	13	19	24	9	8	5	0	0	0	0	0	0	0	0	0	0	0	0	0	0	0	4	0	3	3	1	3	3	0	0	mature_unique
rno-miR-92a-1-5p	69	36	52	20	18	35	45	23	36	49	34	39	0	1	0	2	2	1	2	1	0	0	0	0	6	3	6	6	2	9	24	7	2	5	6	2	mature_unique
rno-miR-92a-3p	948	1048	1273	457	954	1123	1194	1519	1484	953	723	879	109	35	244	36	69	64	57	48	185	55	1	10	5350	14021	8402	11153	11690	7328	23848	4441	4835	4498	7230	6054	mature_unique
rno-miR-92b-3p	13	15	27	18	22	19	15	23	45	14	9	9	0	0	0	0	0	0	0	0	0	2	28	0	15	90	46	58	61	35	94	19	10	14	40	19	mature_unique
rno-miR-93-3p	15	7	5	17	18	16	5	10	15	5	9	2	0	0	1	1	0	1	1	0	0	1	0	0	17	23	21	13	26	26	55	13	5	5	18	0	mature_unique
rno-miR-93-5p	950	923	1339	2276	1374	1404	653	2262	1840	918	694	643	32	12	42	55	27	39	14	21	122	11	0	11	926	2345	1031	3013	1066	2484	4197	828	803	648	914	109	mature_unique
rno-miR-96-5p	3	8	6	24	5	11	5	9	19	1	3	1	0	0	5	3	0	1	0	0	2	0	0	0	0	0	0	0	0	0	0	0	0	0	0	0	mature_unique
rno-miR-98-3p	30	26	19	20	48	29	10	33	38	19	15	18	0	0	1	3	2	3	2	3	2	1	0	0	2	10	5	8	4	6	9	1	8	0	5	0	mature_unique
rno-miR-98-5p	1195	964	938	882	814	652	973	1292	811	649	613	602	11	5	45	16	23	25	7	10	60	7	0	2	36	207	105	118	42	109	228	24	86	18	82	10	mature_unique
rno-miR-99a-3p	50	37	65	66	84	63	35	93	82	45	21	22	0	0	0	0	0	0	1	0	0	0	0	0	3	7	4	6	4	12	12	7	3	4	1	1	mature_unique
rno-miR-99a-5p	1440	430	392	1290	1453	382	465	768	706	242	181	185	7	1	2	13	4	21	8	0	18	1	1	0	24	52	29	55	39	103	129	66	18	38	28	11	mature_unique
rno-miR-99b-3p	58	50	92	89	46	49	56	84	90	47	45	46	4	0	2	1	1	3	6	2	4	4	0	1	20	46	26	21	12	15	72	9	24	33	21	66	mature_unique
rno-miR-99b-5p	12289	10036	8925	34632	11041	9209	11138	17376	13923	5171	3899	5261	366	47	497	367	211	943	359	137	581	175	1	73	3530	4754	5620	1299	1534	1839	14404	1895	256	2819	4098	497	mature_unique
rno-miR-9a-5p	70	73	87	104	75	76	65	114	76	38	30	40	2	1	0	0	2	0	1	0	1	1	0	0	0	0	0	0	0	0	0	0	0	0	0	0	mature_unique
rno-miR-9b-3p	12	9	15	21	17	9	15	30	5	4	7	9	1	0	0	0	0	0	0	0	0	1	0	0	0	0	0	0	0	0	0	0	0	0	0	0	mature_unique
aca-miR-10c-5p	15	21	35	25	19	18	16	19	15	9	4	3	0	0	0	2	0	0	0	0	0	0	0	0	0	0	0	0	0	1	0	0	0	0	0	1	maturehomolog_unique
aca-miR-5450	0	0	0	0	0	0	0	0	0	0	0	0	0	0	0	0	0	0	0	0	0	0	0	0	0	0	0	0	1	0	1	1	0	0	0	0	maturehomolog_unique
aga-miR-1175#aae-miR-1175-3p	0	0	0	0	0	0	0	0	0	0	0	0	0	0	0	0	0	0	0	0	0	0	0	0	7	7	2	7	6	1	5	10	3	4	5	17	maturehomolog_unique
ame-miR-3776	54	12	30	2	9	3	32	2	8	12	13	19	79	71	58	14	6	3	4	4	9	48	0	1	12	14	18	2	7	6	69	4	4	8	32	20	maturehomolog_unique
ame-miR-3782	0	0	0	0	0	0	0	1	0	1	0	0	0	0	0	0	0	0	0	0	0	0	0	0	2	0	1	1	0	0	4	2	1	0	0	0	maturehomolog_unique
ath-miR5021	1	0	2	0	1	0	2	2	0	0	0	1	4	0	6	0	0	0	1	1	0	0	0	1	4	12	11	7	20	11	5	9	1	2	6	14	maturehomolog_unique
ath-miR5658	1	0	5	0	2	2	1	0	4	3	1	3	0	3	0	0	0	0	1	2	0	2	0	9	2	2	1	2	1	1	8	6	2	3	3	3	maturehomolog_unique
ath-miR833a-3p#aly-miR833-3p	0	0	0	0	0	0	0	0	0	0	0	0	0	0	0	0	0	0	0	0	0	0	0	0	6	8	5	3	1	4	8	7	8	3	9	3	maturehomolog_unique
bfl-miR-10a-3p#bbe-miR-10a-3p	8	8	8	5	15	18	8	22	9	5	2	4	0	0	0	0	1	1	0	0	0	0	0	0	1	5	3	2	1	2	9	0	1	3	2	6	maturehomolog_unique
blv-miR-B3-3p	51	14	16	62	56	32	26	40	30	10	10	9	0	0	0	0	0	0	0	0	0	0	0	0	21	33	18	52	27	16	53	19	16	6	14	17	maturehomolog_unique
bmo-miR-2779	2	6	4	0	6	1	3	23	6	2	3	8	3	3	0	3	11	12	0	0	11	8	0	0	1	0	0	0	0	0	3	0	0	1	0	1	maturehomolog_unique
bmo-miR-2840	0	0	0	0	0	0	0	0	0	0	0	0	0	0	0	0	0	0	0	0	0	0	0	0	0	0	0	0	0	0	0	0	0	0	0	0	maturehomolog_unique
bta-miR-1434-5p	174	9	10	14	152	9	10	12	5	17	10	10	0	0	0	0	0	0	2	0	0	0	0	0	0	0	0	0	0	0	0	0	0	0	0	1	maturehomolog_unique
bta-miR-1940	24	18	16	44	11	25	20	14	12	28	16	15	2	0	16	0	0	1	4	0	0	0	0	1	7	7	10	6	2	24	56	7	8	7	8	6	maturehomolog_unique
bta-miR-2340	13405	26784	21399	1085	5747	16837	47163	7477	10296	24353	18411	26269	1117	9735	6715	46328	33126	82480	1371	3112	45130	1263	1180	473	1288	1532	1465	1506	1832	1674	1909	3819	1797	681	1228	3069	maturehomolog_unique
bta-miR-2478	175	212	198	248	429	155	100	395	425	58	109	112	6	19	17	291	578	363	4	25	427	12	0	1	8	33	25	35	10	13	74	16	3	7	28	0	maturehomolog_unique
bta-miR-2487	549	123	301	7	125	34	541	102	89	106	109	198	701	183	778	37	27	21	164	9	17	140	115	84	81	270	159	165	35	113	700	42	70	96	309	761	maturehomolog_unique
bta-miR-26c	27057	20157	23125	38307	46585	26942	11315	36323	35401	12152	14314	11632	213	96	993	1050	899	1032	492	465	1246	127	9	84	966	4857	1611	4360	771	2609	7528	816	432	418	1617	60	maturehomolog_unique
bta-miR-2887	148	26	93	2	10	6	155	13	12	33	26	47	212	91	361	24	7	29	110	32	2	72	0	39	133	75	166	11	25	7	526	19	6	89	169	157	maturehomolog_unique
bta-miR-2889	764	56	134	2	6	3	349	6	7	61	30	95	5334	309	1216	81	17	80	369	45	8	397	0	139	194	266	520	50	98	144	1063	81	79	145	303	385	maturehomolog_unique
bta-miR-2898	344	169	152	330	261	98	343	360	228	85	119	183	13	29	25	292	465	591	10	81	274	19	0	3	37	272	136	175	97	44	425	63	28	23	88	28	maturehomolog_unique
bta-miR-2904	170	56	184	6	22	8	130	24	28	56	26	50	46	19	156	19	19	29	48	283	12	32	0	9	17	32	34	14	23	11	81	23	13	22	54	29	maturehomolog_unique
bta-miR-2957	169	74	55	95	71	41	116	103	87	46	38	51	2	2	0	0	0	3	5	1	0	5	0	0	19	58	33	35	19	188	144	29	33	29	31	1	maturehomolog_unique
bta-miR-3596	4338	2873	3104	3018	3560	1626	3997	3009	2428	1508	1338	1483	96	27	161	44	46	82	101	109	131	67	0	12	303	862	380	637	274	345	1502	225	147	195	344	139	maturehomolog_unique
bta-miR-3600	107176	110358	132871	86977	133580	126567	82793	144821	174261	65605	55276	50500	9087	2060	18621	8728	7705	7789	15021	3288	13925	7423	1156	2064	18514	66101	32518	49360	18652	46808	129880	21232	9065	22405	34344	1665	maturehomolog_unique
bta-miR-3601	26	23	38	29	23	21	13	28	43	20	10	10	0	0	0	0	0	0	0	0	0	0	0	0	7	19	23	30	18	30	36	31	21	18	14	5	maturehomolog_unique
bta-miR-3604#ipu-miR-199b	2712	2324	2947	3368	2557	2572	1679	3119	3725	1415	1366	1408	1	1	1	0	1	0	0	0	4	4	3	0	58	231	87	498	149	893	653	253	193	221	172	9	maturehomolog_unique
bta-miR-669	59	33	25	94	73	36	70	74	52	24	24	30	0	0	2	2	1	5	0	1	1	0	0	0	46	188	135	224	176	260	240	199	38	56	96	5	maturehomolog_unique
cgr-miR-1260	136	107	109	296	167	79	87	249	216	58	64	69	2	7	5	46	119	55	1	6	66	5	0	0	28	67	85	35	35	16	201	12	7	18	54	39	maturehomolog_unique
cgr-miR-1285	388	388	267	1139	382	321	492	426	386	417	89	423	20	7	40	44	40	163	12	10	83	3	0	7	137	1230	463	823	408	301	569	53	27	12	144	46	maturehomolog_unique
cgr-miR-1973	2	0	0	0	0	1	1	0	0	1	2	1	0	0	0	0	0	0	0	0	0	0	0	0	1	0	0	1	0	0	0	0	0	0	0	0	maturehomolog_unique
cin-miR-3575-5p	102	76	37	190	107	62	71	151	90	32	30	38	1	0	3	2	0	3	0	0	3	5	0	0	0	0	0	0	0	0	0	0	0	0	0	0	maturehomolog_unique
cin-miR-4171-5p	7	3	3	1	0	0	10	4	2	2	3	4	8	0	11	0	0	0	3	0	1	0	0	2	3	3	5	1	1	0	0	1	0	2	0	0	maturehomolog_unique
cpa-miR8154	0	0	0	0	0	0	0	0	0	0	0	0	0	0	0	0	0	0	0	0	0	0	0	0	5	11	3	3	15	5	7	7	3	1	0	5	maturehomolog_unique
crm-miR-7594	0	0	0	0	0	0	0	0	0	0	0	0	0	0	0	0	0	0	0	0	0	0	0	0	2	4	2	0	4	0	1	1	1	0	0	4	maturehomolog_unique
dme-miR-10-3p#bmo-miR-10-3p#tca-miR-10-3p#cqu-miR-10-3p#mse-miR-10a	9321	11260	10966	9129	11706	11664	9139	18444	15267	7483	5128	4844	331	167	437	361	225	403	260	99	498	223	0	38	2196	3132	2866	1731	1392	2142	9950	2043	1479	2212	2752	5710	maturehomolog_unique
dme-miR-4949-5p	1	0	1	2	0	1	1	1	0	4	2	0	0	0	0	0	0	0	0	0	0	0	0	0	1	7	3	5	3	15	13	2	2	3	5	5	maturehomolog_unique
dps-miR-1002-3p	9	4	8	4	4	14	2	3	6	3	1	4	0	0	3	0	0	0	0	0	0	1	0	0	0	0	0	0	0	0	0	0	0	0	0	0	maturehomolog_unique
dre-miR-125a#fru-miR-125a#tni-miR-125a#xtr-miR-125a#aca-miR-125a-5p#ola-miR-125a-5p#ipu-miR-125a	16	5	4	6	14	7	5	6	9	3	4	1	0	0	0	1	0	0	0	1	0	0	0	0	0	0	0	0	0	1	0	3	0	1	0	1	maturehomolog_unique
eca-miR-1271	3	3	2	9	7	4	5	13	6	2	1	2	0	0	0	0	0	0	0	0	0	0	0	0	4	19	2	21	5	5	21	9	0	2	6	0	maturehomolog_unique
gga-miR-1692	21	34	36	15	12	16	36	7	17	18	35	20	5	21	10	6	6	18	30	32	5	36	0	19	36	51	21	43	23	28	85	118	35	14	31	15	maturehomolog_unique
gga-miR-1731-3p	0	0	0	0	0	0	0	0	0	0	0	0	0	0	0	0	0	0	0	0	0	0	0	0	11	3	8	9	11	2	20	20	3	7	8	11	maturehomolog_unique
gga-miR-1766	873	807	864	1659	1331	1344	584	982	900	648	725	929	1	0	1	0	0	1	2	0	3	1	7	0	0	2	2	1	3	3	4	1	1	1	2	0	maturehomolog_unique
gga-miR-365b-5p	4	1	1	0	2	1	3	0	0	1	0	2	2	1	0	0	0	0	0	0	0	0	0	0	5	7	7	2	0	5	29	4	1	4	5	0	maturehomolog_unique
gga-miR-6651-5p	0	0	1	0	1	0	4	2	0	1	0	3	0	0	0	1	1	0	0	0	0	0	0	1	2	4	3	1	0	2	8	0	1	0	1	0	maturehomolog_unique
gma-miR4387b	0	0	0	0	0	0	0	0	0	0	0	0	0	0	0	0	0	0	0	0	0	0	0	0	0	0	0	1	1	0	2	3	0	0	0	0	maturehomolog_unique
hbr-miR482	0	0	0	0	0	0	0	0	0	0	0	0	0	0	0	0	0	0	0	0	0	0	0	0	8	2	5	7	6	9	3	12	5	3	5	4	maturehomolog_unique
hcmv-miR-US25-1-3p	4	8	8	21	4	7	4	7	9	3	2	1	0	0	1	0	0	0	0	1	0	0	0	0	0	0	0	0	0	0	1	0	0	0	0	0	maturehomolog_unique
hco-miR-5978	121	79	89	168	54	93	85	186	80	73	87	182	0	1	5	5	1	7	3	1	6	1	0	0	3	10	3	7	2	6	5	2	2	2	3	0	maturehomolog_unique
hhi-miR-7641	649	215	609	72	98	96	575	211	70	355	243	275	141	52	1132	291	67	113	218	30	140	152	0	98	290	247	186	152	161	109	372	404	289	85	178	562	maturehomolog_unique
hhv6b-miR-Ro6-1-3p	57	5	12	1	12	0	38	4	6	6	2	16	4	0	24	3	0	1	3	0	0	3	0	6	1	1	0	0	0	2	0	0	1	0	1	1	maturehomolog_unique
hsa-miR-103b	3205	3941	5953	7364	3831	3682	2783	6934	4811	2810	2065	1972	384	86	469	154	125	112	477	61	315	356	0	85	5569	16316	11713	2057	885	2120	42438	1033	1511	11676	16406	9178	maturehomolog_unique
hsa-miR-1248#ptr-miR-1248#bta-miR-1248#ppy-miR-1248	6	2	1	5	2	2	5	3	4	7	2	2	0	0	0	0	0	0	0	0	0	0	0	0	0	1	0	0	1	0	0	2	0	0	0	0	maturehomolog_unique
hsa-miR-1271-3p	9	2	2	2	3	1	1	5	8	5	3	0	0	0	0	0	0	0	0	0	0	0	0	0	1	14	1	3	0	4	15	2	1	4	0	0	maturehomolog_unique
hsa-miR-1273g-3p	420	540	404	1568	969	819	471	295	718	782	114	553	15	7	57	68	136	288	13	4	84	5	0	8	24	19	8	13	21	16	34	22	2	4	9	10	maturehomolog_unique
hsa-miR-1303#ptr-miR-1303	710	645	490	1717	1068	806	678	608	797	793	159	684	26	16	72	89	136	300	22	14	117	10	0	8	53	500	202	342	153	135	265	33	15	10	72	52	maturehomolog_unique
hsa-miR-148a-3p#mmu-miR-148a-3p#gga-miR-148a-3p#ssc-miR-148a-3p#bta-miR-148a#xtr-miR-148a#oan-miR-148-3p#mml-miR-148a-3p#cfa-miR-148a#ptr-miR-148a#mdo-miR-148-3p#eca-miR-148a#tgu-miR-148-3p#ppy-miR-148a#aca-miR-148a-3p#oar-miR-148a	4742	4802	6288	3699	6606	7405	2514	14437	10677	5228	4211	3183	86	167	119	375	150	959	132	118	261	182	297	38	813	8312	2137	10405	1439	7505	9726	1649	4259	609	2490	1336	maturehomolog_unique
hsa-miR-148a-5p#mmu-miR-148a-5p#ssc-miR-148a-5p#mml-miR-148a-5p	229	229	340	43	236	248	178	486	309	161	168	136	5	6	4	1	6	9	1	4	13	4	0	1	22	231	44	212	37	159	314	28	194	17	61	353	maturehomolog_unique
hsa-miR-1973	0	1	3	1	1	1	1	1	1	1	0	1	0	0	0	0	0	0	0	0	0	0	0	0	2	1	0	3	0	0	0	0	1	0	0	0	maturehomolog_unique
hsa-miR-3168	465	98	122	107	108	113	130	203	87	328	61	86	66	57	105	34	32	329	534	1836	776	642	0	97	1931	203	2267	6495	6130	5153	322	122	345	417	151	1973	maturehomolog_unique
hsa-miR-3184-3p	211	188	299	217	221	363	189	267	325	158	117	113	105	18	296	24	36	47	128	55	44	88	1	20	10509	18002	16364	8737	13011	10188	27402	6958	4945	6773	11283	5900	maturehomolog_unique
hsa-miR-3184-5p	90	118	95	12	26	12	74	23	27	34	44	49	32	4	17	1	2	4	39	4	3	42	0	4	3265	4089	5284	579	890	960	13578	845	629	3158	5154	2378	maturehomolog_unique
hsa-miR-3195	65	8	30	0	28	3	54	6	15	13	13	39	55	12	56	54	36	62	6	1	4	16	0	4	6	3	5	1	3	0	28	0	1	1	9	2	maturehomolog_unique
hsa-miR-3529-3p	16	16	5	34	15	14	9	19	22	15	9	5	0	0	0	0	0	0	0	0	0	0	0	0	0	0	0	1	0	1	0	0	0	0	0	0	maturehomolog_unique
hsa-miR-3607-5p	305	64	59	116	419	109	18	85	76	54	53	66	0	0	0	0	0	0	0	0	0	0	0	0	0	0	0	0	0	0	0	1	0	0	0	0	maturehomolog_unique
hsa-miR-3692-3p	0	0	0	0	0	0	0	0	0	0	1	0	0	0	0	0	0	0	0	0	0	0	0	0	1	0	0	0	0	0	1	0	0	0	0	4	maturehomolog_unique
hsa-miR-378g	6	5	8	8	6	2	7	10	6	2	5	3	1	0	3	0	0	0	1	0	1	0	0	0	7	18	17	5	4	8	56	8	6	20	25	35	maturehomolog_unique
hsa-miR-4286#bta-miR-4286	36	19	9	26	12	4	27	25	16	1	3	10	0	1	1	5	3	11	0	0	5	1	0	0	4	15	10	6	5	3	23	1	2	1	4	6	maturehomolog_unique
hsa-miR-4301	44	34	44	33	18	20	45	39	34	17	24	18	0	0	17	8	5	10	0	1	4	1	0	1	23	68	35	44	90	39	61	24	9	3	17	0	maturehomolog_unique
hsa-miR-4448	59	98	67	2	23	55	216	21	37	109	114	121	79	8	9	69	150	108	5	4	165	3	0	0	17	19	6	20	20	17	55	70	14	8	16	3	maturehomolog_unique
hsa-miR-4454	263	38	126	113	78	10	126	120	16	44	51	95	5	4	1	86	111	172	5	10	110	14	0	0	22	14	23	47	4	7	173	53	8	109	7	35	maturehomolog_unique
hsa-miR-4485	26	17	35	3	5	0	25	5	3	18	6	14	0	0	0	0	2	2	0	0	2	0	0	0	0	6	0	5	1	0	3	2	0	0	3	2	maturehomolog_unique
hsa-miR-4492	73	2	23	0	2	0	24	0	2	1	3	11	119	20	133	9	3	6	28	7	3	23	0	11	21	45	50	10	20	18	63	39	13	30	105	14	maturehomolog_unique
hsa-miR-4497	11	4	8	7	6	2	16	12	5	6	2	9	19	12	6	6	0	8	8	2	0	20	0	0	2	7	4	1	1	1	11	3	2	0	6	7	maturehomolog_unique
hsa-miR-4502	0	0	0	0	0	0	0	0	0	0	0	0	0	0	0	0	0	0	0	0	0	0	0	0	5	2	5	2	6	1	7	2	1	4	8	3	maturehomolog_unique
hsa-miR-4508	51	1	13	0	3	2	18	0	3	0	4	1	35	1	24	4	0	6	7	0	1	6	0	0	0	1	6	0	0	0	2	0	0	0	6	0	maturehomolog_unique
hsa-miR-4523	6	9	11	2	13	3	8	4	11	7	2	1	0	0	0	0	0	0	0	1	2	1	0	0	5	51	21	47	35	26	61	5	15	3	11	1	maturehomolog_unique
hsa-miR-4532	11	1	5	0	2	0	3	0	2	0	1	5	86	8	6	8	2	11	11	4	1	4	0	0	2	7	4	5	1	8	11	1	4	4	6	13	maturehomolog_unique
hsa-miR-4792	1411	390	942	56	47	23	1072	64	36	289	542	459	3308	825	2204	353	60	133	1515	104	366	1841	0	75	243	238	212	49	154	165	1650	99	389	458	467	1749	maturehomolog_unique
hsa-miR-486-3p#mmu-miR-486-3p#mml-miR-486-3p#eca-miR-486-3p	3	5	7	11	9	8	6	14	22	6	4	4	2	1	1	0	3	2	0	2	9	0	0	1	676	399	666	991	2258	1277	1138	750	749	349	167	22	maturehomolog_unique
hsa-miR-486-5p#mmu-miR-486-5p#mml-miR-486-5p#ptr-miR-486#bta-miR-486#eca-miR-486-5p#ssc-miR-486#mmu-miR-3107-5p#ppy-miR-486-5p#cgr-miR-486-5p#ggo-miR-486	2438	4606	4227	16716	6345	4510	5157	6229	11330	1823	893	2020	163	314	112	134	128	347	470	2493	18640	213	521	121	768330	394035	607305	501631	990581	824983	1404974	381213	571503	501735	121630	159464	maturehomolog_unique
hsa-miR-5585-3p	10	2	9	3	16	7	3	6	2	3	2	1	2	0	15	4	5	2	3	1	6	5	0	0	3	5	2	1	3	0	4	2	1	2	1	4	maturehomolog_unique
hsa-miR-574-3p#mmu-miR-574-3p#cfa-miR-574#ssc-miR-574#ggo-miR-574	74	38	34	109	88	44	79	91	62	33	30	39	0	0	2	2	1	7	0	1	2	0	0	1	59	232	165	266	227	323	302	241	44	93	117	7	maturehomolog_unique
hsa-miR-589-5p#mml-miR-589#ppy-miR-589	2	0	1	1	2	1	7	1	0	0	4	0	20	12	8	1	1	1	7	0	1	9	1	0	2	1	0	1	0	0	12	0	1	3	5	0	maturehomolog_unique
hsa-miR-619-5p	0	0	0	1	0	0	0	0	0	0	0	1	0	0	0	2	0	1	0	0	0	0	0	0	0	0	0	0	0	0	1	0	1	1	0	0	maturehomolog_unique
hsa-miR-6797-5p	0	0	0	0	0	0	0	0	0	0	0	0	0	0	0	0	0	0	0	0	0	0	0	0	0	0	0	0	0	0	1	0	0	0	0	0	maturehomolog_unique
hsa-miR-718#ptr-miR-718	33	4	12	0	8	0	26	3	8	3	6	5	67	13	38	7	0	2	4	1	1	2	0	4	5	11	29	0	1	2	23	0	0	7	29	22	maturehomolog_unique
hsa-miR-7641	135	62	153	5	24	15	180	56	14	113	53	60	43	5	354	21	12	67	63	3	15	27	0	63	18	11	10	5	13	8	22	16	10	6	10	42	maturehomolog_unique
hsa-miR-7704	57	19	53	1	64	13	47	22	59	13	10	33	31	11	72	15	2	13	20	4	2	4	0	7	3	4	13	1	1	2	25	8	1	10	19	7	maturehomolog_unique
hsa-miR-7847-3p	1	0	0	0	0	0	0	0	1	1	0	0	5	0	1	0	0	0	3	1	1	2	0	2	1	1	1	2	5	3	10	2	3	1	2	6	maturehomolog_unique
hsa-miR-7977	26	19	23	49	38	11	25	30	24	10	6	30	0	1	1	46	73	99	0	11	59	2	0	0	7	5	4	8	1	4	18	7	4	5	2	3	maturehomolog_unique
hsv1-miR-H17	19	8	15	0	6	3	22	5	6	3	3	6	64	35	44	18	4	9	27	22	6	13	0	6	11	18	64	5	18	8	36	11	6	4	37	196	maturehomolog_unique
ipu-miR-16c	7	5	3	2	3	6	0	5	10	2	3	1	0	0	0	0	0	0	0	0	0	0	0	0	0	0	0	0	0	5	1	0	0	0	0	0	maturehomolog_unique
mdo-miR-7341-5p	45	32	54	42	36	27	37	24	27	47	31	53	0	0	0	0	0	0	0	1	0	0	0	0	0	0	0	0	0	0	0	0	0	0	0	0	maturehomolog_unique
mdo-miR-7371c-5p	21	7	6	1	21	19	5	13	14	9	3	5	0	0	0	0	0	0	0	0	0	0	0	0	0	0	0	0	0	0	0	0	0	0	0	0	maturehomolog_unique
mml-miR-7164-5p	0	0	0	1	0	0	0	0	0	0	0	0	0	0	0	0	0	0	0	0	0	0	0	0	3	1	0	0	0	0	1	2	0	0	0	2	maturehomolog_unique
mmu-let-7g-5p#hsa-let-7g-5p#bta-let-7g#oan-let-7g-5p#mml-let-7g-5p#cfa-let-7g#ptr-let-7g#eca-let-7g#ssc-let-7g#tgu-let-7g-5p#ppy-let-7g#aca-let-7g#cgr-let-7g-5p	96	114	99	188	176	140	43	212	230	100	45	61	0	0	3	2	2	5	3	1	5	1	0	0	3	33	5	20	3	12	37	3	1	1	10	1	maturehomolog_unique
mmu-miR-1187	7	3	1	3	0	1	15	4	2	2	3	7	0	0	1	0	0	0	0	0	1	0	0	0	11	16	6	4	2	3	14	4	0	2	12	2	maturehomolog_unique
mmu-miR-1195	30	18	21	16	16	6	40	18	18	15	19	26	12	14	26	21	13	25	0	2	25	2	0	3	19	44	30	38	20	63	104	52	23	41	39	96	maturehomolog_unique
mmu-miR-1247-5p#hsa-miR-1247-5p#ptr-miR-1247#ppy-miR-1247#mml-miR-1247-5p	12	12	5	4	9	13	9	7	9	6	4	5	0	0	0	0	0	0	0	0	0	0	0	0	6	3	8	2	2	5	10	3	2	1	1	3	maturehomolog_unique
mmu-miR-142b	127	46	31	17	67	26	24	27	26	29	24	14	0	0	0	0	0	0	0	0	9	0	0	0	1	28	12	21	6	51	23	4	23	3	16	0	maturehomolog_unique
mmu-miR-149-5p#hsa-miR-149-5p#mml-miR-149-5p#ptr-miR-149#cfa-miR-149#eca-miR-149#ppy-miR-149#ssc-miR-149#ggo-miR-149#bta-miR-149-5p	34	8	27	3	35	11	12	18	19	7	3	9	1	0	0	4	8	5	0	1	3	0	0	0	1	2	0	6	19	9	5	14	14	7	3	7	maturehomolog_unique
mmu-miR-16-1-3p#oan-miR-16a-3p	10	10	10	3	3	12	5	8	13	8	6	8	0	0	0	0	0	0	2	0	0	0	0	0	0	0	2	2	1	3	1	0	0	0	0	0	maturehomolog_unique
mmu-miR-1895	3	2	2	0	3	2	8	1	1	1	1	0	1	0	2	0	0	1	1	2	0	4	0	0	3	2	2	4	1	8	9	0	6	3	1	4	maturehomolog_unique
mmu-miR-1940	0	1	2	0	1	0	4	1	0	1	3	1	0	0	0	0	0	0	1	1	0	0	0	0	1	5	2	5	1	9	6	2	6	1	10	2	maturehomolog_unique
mmu-miR-1957a	15	19	25	1	3	6	17	11	6	12	19	9	10	1	3	22	63	9	2	0	91	1	0	0	1	12	0	5	4	2	22	13	3	5	2	4	maturehomolog_unique
mmu-miR-1983	20	6	17	10	7	7	10	5	5	13	10	11	0	0	0	0	0	1	0	1	0	1	0	0	10	75	21	77	18	55	80	19	7	12	30	7	maturehomolog_unique
mmu-miR-2137	205	26	51	1	1	0	107	5	5	20	22	36	575	59	248	25	7	25	53	9	4	73	0	17	59	130	169	28	86	101	280	40	150	55	138	795	maturehomolog_unique
mmu-miR-30f	75	55	158	46	106	62	61	133	101	34	49	28	2	2	3	1	3	2	3	1	5	3	0	0	7	3	10	4	3	14	23	3	9	12	10	30	maturehomolog_unique
mmu-miR-3470a	0	2	1	1	2	0	2	2	0	1	0	5	0	1	0	0	1	0	0	0	0	1	0	0	1	2	0	1	1	2	0	1	1	0	1	0	maturehomolog_unique
mmu-miR-3470b	8	6	1	14	0	5	20	12	4	5	16	14	11	13	2	7	1	2	0	0	3	6	0	1	10	7	13	10	12	13	20	14	5	8	7	11	maturehomolog_unique
mmu-miR-3472	1	1	1	2	1	0	1	0	1	1	1	0	2	7	1	0	1	0	0	0	0	1	0	1	4	1	2	1	0	0	7	2	0	0	1	1	maturehomolog_unique
mmu-miR-3473a	1	1	3	0	0	2	3	1	2	0	1	1	6	2	1	1	1	1	2	0	3	4	0	0	2	3	0	3	2	3	5	3	1	0	2	1	maturehomolog_unique
mmu-miR-3473b	4	2	1	2	0	1	1	1	0	2	2	3	10	15	2	2	2	0	1	0	3	5	0	3	6	7	7	3	8	6	10	11	5	3	5	13	maturehomolog_unique
mmu-miR-3535	191	166	188	275	232	201	179	136	165	160	54	81	69	0	18	0	0	1	26	0	0	4	0	2	4	6	12	6	5	3	58	4	0	19	14	12	maturehomolog_unique
mmu-miR-3963	3	5	2	0	3	5	1	4	5	5	1	2	0	0	2	3	16	5	0	0	8	0	0	0	0	2	0	0	0	0	0	0	0	0	0	0	maturehomolog_unique
mmu-miR-3968	6	8	4	6	6	6	2	11	7	1	2	4	1	1	0	20	64	20	1	1	43	0	0	0	5	2	4	0	3	1	8	0	2	3	3	1	maturehomolog_unique
mmu-miR-466i-5p	8	2	4	2	4	0	4	4	3	5	2	3	6	4	1	1	0	0	6	0	1	3	0	2	8	2	6	0	2	2	8	0	1	2	1	0	maturehomolog_unique
mmu-miR-5099	27	8	19	3	21	4	10	2	15	11	3	11	0	0	1	0	0	0	0	1	0	0	0	1	0	3	0	0	0	0	0	0	1	0	0	0	maturehomolog_unique
mmu-miR-5100	8	2	1	2	2	1	5	9	2	2	3	2	3	2	2	7	10	22	0	1	7	4	0	0	1	1	4	1	4	0	7	3	0	1	0	0	maturehomolog_unique
mmu-miR-5106	0	0	19	0	0	7	0	0	13	10	13	6	2	2	1	1	0	1	140	127	0	29	0	86	15	13	13	9	13	10	12	46	7	4	15	5	maturehomolog_unique
mmu-miR-5119	0	0	1	2	0	5	0	0	1	4	42	0	5	17	14	2	1	95	62	25	0	52	0	10	3	3	2	3	3	2	5	6	3	2	9	14	maturehomolog_unique
mmu-miR-5126	54	5	5	0	3	0	22	2	3	2	3	9	64	1	9	1	0	1	5	4	0	5	0	0	5	5	10	3	1	7	16	1	4	3	14	18	maturehomolog_unique
mmu-miR-6236	31	14	43	10	34	11	24	32	24	6	5	26	2	3	11	2	1	2	2	4	3	5	0	3	3	2	2	1	1	0	24	1	1	2	16	23	maturehomolog_unique
mmu-miR-6238	15	2	8	1	5	3	17	12	5	11	1	13	9	0	33	0	0	1	3	0	0	3	11	10	15	11	8	1	8	2	36	4	2	5	14	8	maturehomolog_unique
mmu-miR-6239	58	17	62	3	13	8	57	7	6	28	16	24	57	9	174	14	4	18	35	5	6	36	0	13	35	11	23	19	26	11	92	23	17	23	35	18	maturehomolog_unique
mmu-miR-6240	2741	522	1501	53	70	31	2667	129	23	472	997	578	281	66	1015	71	31	141	268	13	79	101	0	85	188	250	203	63	99	65	720	233	30	123	155	22	maturehomolog_unique
mmu-miR-6343	0	0	0	0	0	0	0	0	1	0	0	0	0	0	0	0	0	0	0	0	1	0	0	0	0	0	1	0	0	0	0	0	0	0	0	0	maturehomolog_unique
mmu-miR-6412	13	10	9	15	28	6	4	11	21	8	5	6	1	3	2	1	8	10	1	3	7	1	0	0	4	9	4	8	6	6	21	2	7	2	3	0	maturehomolog_unique
mmu-miR-682	1	1	0	0	0	0	1	0	0	0	0	0	0	0	1	0	0	0	0	0	0	0	0	0	3	2	5	3	0	0	3	5	2	0	4	1	maturehomolog_unique
mmu-miR-690	14	11	3	27	12	8	9	6	8	7	5	14	5	4	5	6	1	12	1	1	5	3	0	2	19	17	10	13	19	27	29	27	4	10	9	7	maturehomolog_unique
mmu-miR-6937-5p	76	12	48	1	17	2	89	16	6	30	21	29	33	3	137	4	6	0	14	4	3	8	0	11	10	7	5	8	4	4	38	14	8	10	3	14	maturehomolog_unique
mmu-miR-6971-3p	0	0	0	0	0	0	0	0	0	0	1	1	0	0	0	0	0	0	0	0	0	0	0	0	4	5	3	9	6	2	9	8	0	0	3	5	maturehomolog_unique
mmu-miR-709	5	0	9	3	1	2	3	1	2	0	2	5	18	26	20	5	3	6	8	2	13	7	0	5	9	11	19	8	14	7	33	11	5	7	24	12	maturehomolog_unique
mmu-miR-7225-5p	0	0	0	0	0	0	0	0	0	0	0	0	0	0	0	0	0	0	0	0	0	0	0	0	1	1	2	1	1	0	2	3	3	1	0	0	maturehomolog_unique
mmu-miR-744-3p#hsa-miR-744-3p	3	4	3	7	6	3	6	10	8	3	3	0	1	0	0	0	0	0	0	0	0	0	0	0	5	2	3	4	0	3	11	2	0	3	1	0	maturehomolog_unique
mmu-miR-744-5p#hsa-miR-744-5p#ptr-miR-744#bta-miR-744#ssc-miR-744#ppy-miR-744	88	109	120	196	99	130	78	130	151	60	32	54	3	4	9	2	6	8	3	2	5	2	0	1	350	722	464	582	720	585	1111	468	394	265	425	81	maturehomolog_unique
mmu-miR-7667-3p	0	3	0	0	1	0	3	2	0	0	2	1	1	2	8	2	0	1	0	0	2	0	0	1	17	12	20	13	6	22	54	7	8	23	15	78	maturehomolog_unique
mmu-miR-7667-5p	48	25	34	5	5	8	34	13	6	8	39	42	71	56	87	42	18	50	38	1	62	22	0	84	1197	1082	1665	1513	914	2612	4305	491	888	1798	1273	3228	maturehomolog_unique
mmu-miR-7687-5p	1	0	0	0	1	0	0	0	0	0	0	0	0	0	0	0	1	0	0	0	0	0	0	0	6	15	7	8	10	5	18	9	4	3	10	0	maturehomolog_unique
mne-miR-140	10	11	25	14	18	4	15	20	17	8	6	11	0	1	1	0	0	0	0	0	1	1	0	0	5	18	11	15	11	46	59	12	19	17	25	6	maturehomolog_unique
oan-miR-1386	102	83	93	120	268	48	64	161	179	22	46	84	9	8	10	264	387	388	5	29	499	21	0	2	13	77	33	56	28	36	147	19	5	9	44	6	maturehomolog_unique
oan-miR-30f	8	12	10	21	7	10	5	27	12	2	3	3	0	0	0	0	0	0	0	0	0	0	0	0	0	0	0	0	0	1	5	0	0	0	1	1	maturehomolog_unique
oan-miR-7427-5p	0	0	0	0	0	0	0	0	0	0	0	0	0	0	0	0	0	0	0	0	0	0	0	0	0	0	0	0	0	0	1	0	0	0	0	0	maturehomolog_unique
oan-miR-92d	1	0	0	0	1	1	0	1	0	0	0	0	0	0	0	0	0	0	1	0	0	0	0	0	5	6	1	6	5	5	7	3	0	4	4	1	maturehomolog_unique
pma-miR-192-5p	8	10	17	26	14	20	8	25	26	5	3	8	0	2	2	0	0	3	3	2	3	7	1	7	5	3	3	2	1	2	4	1	0	1	7	4	maturehomolog_unique
ppc-miR-2241a	0	0	0	0	0	0	0	0	0	0	0	0	0	0	0	0	0	0	0	0	0	0	0	0	8	14	9	7	9	3	12	5	5	2	14	11	maturehomolog_unique
ppy-miR-151b	1728	1968	2512	2158	2654	2615	1187	4447	3883	1718	1120	1186	80	48	361	187	135	247	124	75	210	51	0	20	618	2253	1140	1504	717	894	3867	623	506	692	1330	1166	maturehomolog_unique
prd-miR-7911c-3p	0	0	0	0	0	0	0	0	0	0	0	0	0	0	0	0	0	0	0	0	0	0	0	0	0	0	0	0	0	0	0	0	0	0	1	0	maturehomolog_unique
rrv-miR-rR1-4-5p	0	1	0	0	0	0	0	0	0	0	0	0	2	0	1	0	0	0	0	1	0	0	0	0	0	0	0	0	0	0	0	0	0	0	0	0	maturehomolog_unique
sha-miR-716b	98	46	63	52	83	61	125	87	50	82	21	93	8	4	93	4	6	9	18	1	8	7	0	9	33	28	21	12	20	15	33	25	5	10	24	16	maturehomolog_unique
spu-miR-10	8	7	7	26	14	9	8	9	13	8	1	3	1	0	0	1	0	1	0	0	1	0	0	0	0	0	1	0	0	1	2	0	0	1	1	0	maturehomolog_unique
spu-miR-5993	6	6	9	30	11	16	7	6	9	11	4	6	0	0	0	0	0	0	0	0	0	0	0	0	0	1	0	0	0	1	0	0	0	0	0	0	maturehomolog_unique
ssc-miR-1285	339	184	188	381	366	231	274	295	281	135	107	176	14	12	87	43	48	63	21	2	44	16	0	7	27	72	49	47	43	24	173	27	28	10	50	81	maturehomolog_unique
ssc-miR-4332	52	3	10	0	9	0	25	3	3	0	7	15	55	3	34	4	4	1	1	0	0	4	0	2	3	1	5	1	0	0	8	0	2	0	4	2	maturehomolog_unique
tae-miR1134	0	0	0	0	0	0	0	0	0	0	0	0	0	0	0	0	0	0	0	0	0	0	0	0	3	0	0	0	6	0	2	1	0	0	0	2	maturehomolog_unique
tca-miR-3815-3p	0	0	0	0	0	0	0	0	0	0	0	0	0	0	0	0	0	0	0	0	0	0	0	0	0	1	1	0	6	1	1	5	2	0	0	0	maturehomolog_unique
tur-miR-10-5p	6	7	7	14	6	3	0	1	8	5	0	1	0	0	0	0	0	0	0	0	0	0	0	0	0	2	0	0	0	0	2	0	0	0	0	0	maturehomolog_unique

## Sheet: 2.3_Cortex
	IR	IR	IR	IR	IR	IR	IR	Sham	Sham	Sham	Sham	Sham
miR	IRRCS_1_cortex	IRRCS_2_cortex	IRRCS_3_cortex	IRRCS_7_cortex	IRRCS_10_cortex	IRRCS_11_cortex	IRRCS_12_cortex	IRRCS_4_cortex	IRRCS_5_cortex	IRRCS_6_cortex	IRRCS_8_cortex	IRRCS_9_cortex	p.values.deseq2	p.values.adjust.BH	log2FoldChange
rno-let-7a-1-3p#rno-let-7c-2-3p	349	239	183	172	164	130	138	369	319	240	363	257	0.730041	0.901481	-0.0620521
rno-let-7a-5p	14109	12106	13121	12437	7282	5968	5957	10541	13465	7821	14008	11574	0.00551616	0.0380842	0.395598
rno-let-7b-3p	152	131	117	120	75	61	71	368	176	126	233	218	0.0222625	0.10686	-0.486581
rno-let-7b-5p	6643	4581	4810	6285	2519	2103	2310	4931	5637	2955	4840	3943	0.0263425	0.12408	0.442181
rno-let-7c-5p	19682	15483	17718	19756	9081	8020	8148	12499	15262	8491	14987	12132	2.62731e-05	0.000382673	0.702213
rno-let-7d-3p	580	426	394	646	303	248	257	380	534	475	717	713	0.563088	0.803955	0.123081
rno-let-7d-5p	2242	1391	1894	1178	950	817	727	2021	2449	1423	1947	2012	0.807457	0.916982	-0.0378823
rno-let-7e-3p	27	26	19	30	26	16	7	49	23	24	21	33	0.696559	0.88653	0.121075
rno-let-7e-5p	2172	1994	2311	1985	1322	1105	1110	1929	2167	1630	2527	2285	0.01611	0.0845775	0.295642
rno-let-7f-1-3p	57	30	30	33	30	29	17	79	46	36	81	53	0.345112	0.639276	-0.23272
rno-let-7f-2-3p	61	50	50	36	47	21	33	95	52	53	90	67	0.574172	0.813548	-0.126555
rno-let-7f-5p	32496	31510	35889	21818	22668	18004	15187	26332	34817	27713	43507	42450	0.406375	0.690511	0.137559
rno-let-7i-3p	39	26	11	51	13	15	9	25	25	11	23	15	0.0348781	0.15506	0.749138
rno-let-7i-5p	12638	12161	14389	8995	8569	6970	6747	13138	14101	11835	18460	16112	0.672906	0.879759	0.0575916
rno-miR-100-5p	1454	602	446	647	305	210	297	1497	1118	589	884	771	0.317779	0.624544	-0.280568
rno-miR-101a-3p	6688	6303	8943	3565	4450	3134	2664	6275	8831	6209	13573	10141	0.280701	0.584998	-0.227913
rno-miR-101a-5p	2753	2520	4141	1325	1649	1147	1058	4034	3081	2301	4723	3352	0.391751	0.67981	-0.182693
rno-miR-101b-3p	452	411	641	239	307	250	231	499	501	402	913	575	0.760536	0.912643	-0.0628267
rno-miR-103-3p	1781	2112	3159	1674	1836	1256	1135	4820	2494	2707	4714	3339	0.118744	0.33622	-0.327414
rno-miR-106b-3p	54	58	75	64	33	37	38	59	56	46	60	63	0.0332369	0.150913	0.442671
rno-miR-106b-5p	91	55	56	50	32	26	30	126	89	41	92	71	0.381444	0.676107	-0.20418
rno-miR-107-3p	1083	1100	1577	757	767	517	507	3070	1346	1301	2386	1694	0.0169718	0.086465	-0.514425
rno-miR-10a-3p	167	149	189	74	87	82	72	233	192	152	273	218	0.146427	0.396769	-0.273095
rno-miR-10a-5p	837559	928398	861281	980747	592289	391710	401746	1844318	898623	966812	1565004	1125048	0.235352	0.522004	-0.238205
rno-miR-10b-3p	63	40	38	34	19	24	28	105	74	35	80	65	0.0900981	0.279328	-0.410123
rno-miR-10b-5p	98	89	178	89	53	61	35	188	107	98	178	116	0.664237	0.877017	-0.104954
rno-miR-122-5p	1	1	4	4	3	1	0	3	6	3	11	19	0.0348428	0.15506	-1.09045
rno-miR-1249	27	17	10	31	7	7	10	35	18	24	24	21	0.792172	0.916982	-0.0881366
rno-miR-125a-3p	15	22	23	26	6	13	16	27	25	27	33	29	0.752231	0.909172	-0.0928156
rno-miR-125a-5p	14519	8210	6714	10170	4266	3373	4363	11485	19164	9233	10860	11473	0.334442	0.633308	-0.232511
rno-miR-125b-1-3p	113	77	98	71	65	65	50	30	90	82	65	81	0.0115395	0.0639112	0.677929
rno-miR-125b-2-3p	292	355	541	200	285	185	210	599	585	653	868	825	0.00403092	0.0303221	-0.634551
rno-miR-125b-5p	6514	1709	1420	1998	1004	684	832	2699	6151	1879	2243	2482	0.583914	0.813548	-0.191927
rno-miR-126a-3p	5560	4039	4677	3173	2708	2209	1864	5338	5027	4050	5920	5882	0.772106	0.916982	-0.035232
rno-miR-126a-5p	21606	18412	29227	7992	13199	12013	11420	36875	28252	21458	42196	36749	0.0742927	0.24314	-0.396551
rno-miR-127-3p	70	33	40	58	42	66	31	127	66	74	151	116	0.16092	0.41162	-0.402779
rno-miR-128-1-5p	8	10	21	5	8	4	4	20	4	6	13	15	0.744305	0.903927	0.130699
rno-miR-128-3p	157	144	121	79	102	107	105	162	233	165	233	302	0.29729	0.604169	-0.241653
rno-miR-129-5p	10	9	7	6	7	4	3	10	6	7	13	5	0.529964	0.789541	0.242341
rno-miR-1306-5p	6	1	1	1	0	2	1	3	2	4	6	2	0.557032	0.800355	-0.323286
rno-miR-130a-3p	5881	2175	3785	1615	1679	1390	1419	3448	6254	3037	3910	3737	0.47802	0.746228	-0.176026
rno-miR-130b-3p	66	29	41	15	18	18	26	46	41	29	20	32	0.231649	0.521211	0.361088
rno-miR-130b-5p	2	2	3	3	0	2	1	4	2	1	3	3	0.872985	0.945278	0.0869994
rno-miR-132-3p	73	30	73	54	43	33	41	7	11	18	14	21	9.81227e-14	4.94538e-12	2.22969
rno-miR-133a-3p	1	6	4	6	2	1	2	4	4	6	7	15	0.318468	0.624544	-0.478519
rno-miR-133a-5p	0	0	0	1	0	0	0	0	0	0	0	0	0.738714	0.901481	0.135598
rno-miR-133c	3	1	1	3	1	2	1	0	1	0	0	4	0.166013	0.415595	0.825003
rno-miR-134-5p	40	35	40	33	15	15	11	49	33	20	30	36	0.38516	0.676107	0.226776
rno-miR-135a-5p	8	5	0	3	0	2	0	30	6	0	7	8	0.0825259	0.263247	-0.985894
rno-miR-136-3p	2	1	2	1	0	3	2	5	4	5	8	8	0.0490192	0.196067	-0.998118
rno-miR-138-5p	67	29	38	31	26	21	24	38	71	18	59	35	0.489923	0.75052	0.193229
rno-miR-139-5p	136	45	70	71	32	26	32	165	81	42	107	72	0.671384	0.879759	-0.122796
rno-miR-1-3p	3	1	4	2	2	2	0	3	6	2	3	6	0.534773	0.792722	-0.323085
rno-miR-140-3p	1957	1883	2461	2065	1632	1144	1100	2120	2161	2077	4286	2814	0.962529	0.986052	0.0087626
rno-miR-140-5p	115	66	97	53	71	58	57	143	117	131	183	141	0.100241	0.302523	-0.331763
rno-miR-141-3p	1425	924	765	455	500	421	405	1513	1313	752	1212	950	0.442906	0.717765	-0.163283
rno-miR-141-5p	26	12	32	18	4	10	8	10	19	11	14	21	0.116783	0.334423	0.536843
rno-miR-142-3p	228	136	132	78	94	62	64	76	156	114	112	117	0.0496095	0.196067	0.473012
rno-miR-142-5p	1555	1016	865	305	631	450	551	1013	1871	1150	1276	1565	0.286517	0.59017	-0.284822
rno-miR-143-3p	75871	73806	97910	71615	52462	60203	49329	39590	90268	77928	156696	106958	0.464904	0.736828	0.185129
rno-miR-143-5p	35	25	24	15	15	13	20	23	23	26	34	35	0.551691	0.798141	0.1573
rno-miR-144-3p	88	65	49	13	20	11	18	104	219	59	73	206	0.0010669	0.00983318	-1.21268
rno-miR-144-5p	26	53	55	21	17	11	13	80	83	68	66	98	0.00145554	0.01287	-0.918346
rno-miR-145-3p	149	106	81	97	38	37	45	164	119	81	121	111	0.802947	0.916982	-0.056948
rno-miR-145-5p	2780	392	377	792	335	300	300	1208	1965	422	831	403	0.916361	0.966205	0.0426437
rno-miR-146a-5p	3054	2679	2226	2434	2395	1376	1546	4567	3114	3625	3427	4194	0.438495	0.71502	-0.146394
rno-miR-146b-5p	3077	2262	4037	2369	2821	2300	2277	1031	626	960	975	919	7.02009e-22	8.84531e-20	2.16122
rno-miR-147	11	12	16	9	3	4	3	1	3	4	5	7	0.00221127	0.0179755	1.33236
rno-miR-148b-3p	1779	1199	1403	1436	822	665	589	1665	1492	1427	2168	1773	0.80576	0.916982	-0.0361633
rno-miR-148b-5p	97	62	68	33	40	46	31	148	122	114	121	103	0.00793774	0.0519561	-0.591226
rno-miR-150-3p	1	3	1	1	2	3	2	1	1	5	0	3	0.552681	0.798141	0.338875
rno-miR-150-5p	1323	172	297	162	172	153	173	403	3514	341	490	485	#N/A	#N/A	-0.909651
rno-miR-151-3p	5685	6709	6306	7904	4003	3464	4198	10128	6646	6585	13232	9580	0.585949	0.813548	-0.1064
rno-miR-151-5p	3731	2252	2928	1484	1278	1074	1046	4128	5164	2395	4240	4286	0.0102012	0.059784	-0.496558
rno-miR-152-3p	387	213	275	272	144	131	139	444	247	241	389	316	0.931744	0.974272	0.0153521
rno-miR-152-5p	30	21	29	20	16	13	18	32	14	20	33	32	0.304681	0.611789	0.273468
rno-miR-155-5p	28	21	22	35	15	2	6	11	7	8	8	9	0.00016614	0.00209337	1.42995
rno-miR-15b-3p	30	20	22	22	20	19	21	65	25	15	30	28	0.74915	0.907624	0.0988348
rno-miR-15b-5p	1251	481	671	306	312	255	244	824	1379	538	831	793	0.251321	0.539662	-0.30438
rno-miR-16-3p	5	5	3	4	5	3	5	2	9	2	6	10	0.677292	0.879759	0.189785
rno-miR-16-5p	8374	7449	9073	4116	5509	3588	3282	11720	10822	9575	10608	13189	0.0503544	0.196734	-0.351257
rno-miR-17-1-3p	21	18	18	15	17	8	5	20	7	11	17	16	0.0717547	0.241625	0.577791
rno-miR-17-5p	246	180	225	169	216	150	164	429	203	169	291	228	0.348811	0.639276	0.217961
rno-miR-181a-1-3p	121	142	189	107	86	77	69	192	140	177	208	207	0.511528	0.771886	-0.12663
rno-miR-181a-2-3p	35	49	80	29	26	20	19	29	68	56	63	79	0.646453	0.861938	-0.134966
rno-miR-181a-5p	20456	25719	45804	17395	19546	14505	13751	32158	32598	38225	45065	46875	0.345529	0.639276	-0.21367
rno-miR-181b-1-3p	4	3	6	1	3	6	1	5	4	11	11	7	0.329912	0.629831	-0.451942
rno-miR-181b-5p	1212	1518	3045	969	1161	843	821	1683	1939	2110	2389	2869	0.633127	0.852552	-0.118431
rno-miR-181c-3p	121	138	177	135	71	75	68	192	145	166	254	236	0.23718	0.522004	-0.228447
rno-miR-181c-5p	1985	2440	3651	1273	1855	1403	1392	5225	2615	2806	5192	3992	0.139787	0.382895	-0.341248
rno-miR-181d-5p	309	420	519	267	287	193	219	491	338	393	679	532	0.986097	0.992069	-0.00353449
rno-miR-182	808	1334	1347	775	961	733	737	5087	2458	3001	4136	4127	3.79922e-08	9.57404e-07	-1.26511
rno-miR-183-3p	16	12	10	3	2	4	3	18	28	8	15	10	0.162972	0.41162	-0.557036
rno-miR-183-5p	322	341	278	231	183	120	162	1678	678	510	929	754	4.13578e-08	9.92586e-07	-1.30138
rno-miR-1839-3p	25	11	19	20	8	7	10	72	32	9	30	29	0.0845034	0.26786	-0.609555
rno-miR-1839-5p	230	233	321	180	158	135	123	412	273	271	313	332	0.522399	0.784284	-0.11222
rno-miR-184	8	47	36	18	101	12	3	46	40	291	18	140	0.18059	0.441832	-0.780416
rno-miR-1843-3p	11	7	6	13	8	7	4	5	9	2	20	8	0.252699	0.539662	0.469638
rno-miR-1843-5p	60	60	94	36	40	29	31	113	104	69	137	131	0.0113917	0.0637937	-0.540556
rno-miR-185-5p	63	42	35	60	25	20	26	105	44	35	83	44	0.788561	0.916982	-0.0745524
rno-miR-186-5p	6396	5012	5723	2735	4014	3473	3577	7295	8826	8476	10349	8861	0.0694264	0.239071	-0.363577
rno-miR-187-3p	12	10	13	16	4	6	7	9	4	4	8	7	0.00491516	0.0348907	1.06701
rno-miR-188-5p	44	30	73	32	39	28	34	39	53	47	61	47	0.252025	0.539662	0.290861
rno-miR-18a-3p	3	2	1	4	2	1	6	1	2	2	5	2	0.233639	0.522004	0.639027
rno-miR-18a-5p	85	20	17	73	25	19	21	28	10	8	12	7	3.77755e-06	6.14157e-05	1.82452
rno-miR-190a-5p	174	38	32	19	37	22	15	48	168	27	75	58	0.665044	0.877017	-0.177859
rno-miR-190b-5p	25	15	10	20	14	8	12	20	15	19	21	20	0.458016	0.72846	0.223498
rno-miR-191a-3p	55	34	39	15	17	21	27	48	58	40	52	54	0.478898	0.746228	-0.17897
rno-miR-191a-5p	33904	35355	38324	31907	27721	19653	21740	126014	42461	48064	72728	59804	0.0143918	0.0771646	-0.564371
rno-miR-191b	6	3	2	0	0	2	4	2	5	1	3	5	0.779719	0.916982	0.151464
rno-miR-192-3p	57	30	28	53	27	16	13	116	52	33	83	48	0.149293	0.398181	-0.43317
rno-miR-192-5p	160137	156735	208756	104069	94968	75292	68097	414000	232013	176581	385254	280463	0.000541829	0.00557309	-0.656706
rno-miR-193-3p	502	131	173	226	65	68	67	311	549	157	292	150	0.434097	0.71034	-0.274001
rno-miR-194-3p	28	35	30	22	11	10	24	44	36	39	41	41	0.392509	0.67981	-0.225928
rno-miR-194-5p	2799	2388	2929	1155	1461	1002	808	4714	4230	2757	4288	4336	0.00171281	0.0146314	-0.625361
rno-miR-195-3p	38	34	50	28	29	27	25	51	38	48	57	55	0.947933	0.981024	0.0149078
rno-miR-195-5p	1087	433	335	453	249	219	245	732	968	370	602	489	0.881653	0.945278	-0.0399868
rno-miR-196a-3p	18	15	20	5	11	8	7	16	17	18	33	25	0.413877	0.693004	-0.256582
rno-miR-196a-5p	398	285	374	396	202	189	169	368	297	262	374	389	0.0278556	0.1288	0.346892
rno-miR-196b-3p	14	12	5	13	2	7	4	14	5	7	7	9	0.250987	0.539662	0.461812
rno-miR-196b-5p	769	684	776	748	474	379	367	470	815	743	992	906	0.341432	0.639276	0.184866
rno-miR-196c-3p	14	5	3	8	5	5	4	10	9	6	10	23	0.544126	0.798141	-0.243838
rno-miR-196c-5p	6	5	2	15	6	5	3	2	1	4	6	2	0.00849114	0.0548658	1.29578
rno-miR-199a-3p	2954	2368	2981	1744	1489	1414	1454	3413	2817	2668	3127	3801	0.782682	0.916982	-0.0391656
rno-miR-199a-5p	1050	777	658	836	531	367	493	1350	820	1007	1086	1240	0.486338	0.748901	-0.126412
rno-miR-19a-3p	61	44	49	47	67	37	49	41	30	41	88	31	0.00865666	0.0552273	0.778679
rno-miR-19b-3p	354	356	324	296	362	245	270	579	274	339	565	310	0.23118	0.521211	0.284458
rno-miR-200a-3p	1200	1049	1404	863	660	503	500	1683	1368	1005	1966	1507	0.183053	0.443551	-0.190276
rno-miR-200a-5p	90	79	173	49	72	56	67	192	127	128	222	195	0.0903382	0.279328	-0.411574
rno-miR-200b-3p	1046	917	834	646	523	395	385	1484	1362	1056	1471	1504	0.000667601	0.00659747	-0.450513
rno-miR-200b-5p	36	39	20	35	20	16	23	67	61	45	64	60	0.0354669	0.155437	-0.503366
rno-miR-200c-3p	51	41	33	34	11	14	24	71	41	31	47	59	0.522856	0.784284	-0.168562
rno-miR-201-3p	26	3	6	7	1	5	2	4	22	3	9	6	0.811546	0.916982	0.117028
rno-miR-201-5p	95	104	77	46	66	53	48	131	147	122	251	180	0.0070367	0.0472866	-0.595583
rno-miR-203a-3p	845	926	981	684	481	490	433	2283	1246	1102	2120	1655	0.000174664	0.00214709	-0.654065
rno-miR-203a-5p	36	26	32	15	15	19	16	28	43	31	63	45	0.289026	0.59017	-0.273585
rno-miR-203b-3p	181	160	143	157	91	77	79	243	194	171	439	258	0.0350731	0.15506	-0.414076
rno-miR-203b-5p	194	242	289	148	98	120	90	392	271	206	471	371	0.0471909	0.191808	-0.412585
rno-miR-204-3p	0	0	1	2	0	0	1	1	0	0	0	0	0.335703	0.633308	0.54506
rno-miR-204-5p	339	222	213	267	157	106	103	489	363	242	474	315	0.0914478	0.28025	-0.323193
rno-miR-205	63	58	70	60	55	119	129	120	79	155	173	65	0.618995	0.840899	0.188206
rno-miR-208a-3p	0	0	0	0	0	0	0	0	0	0	0	0	#N/A	#N/A	#N/A
rno-miR-208b-3p	0	0	0	0	0	0	0	0	0	0	0	0	#N/A	#N/A	#N/A
rno-miR-20a-5p	140	67	63	96	81	43	61	97	59	37	89	52	0.00104939	0.00983318	0.831971
rno-miR-20b-5p	6	2	2	5	4	0	6	3	3	5	8	6	0.809573	0.916982	0.116675
rno-miR-210-3p	70	69	107	103	36	55	50	115	91	81	161	117	0.785975	0.916982	-0.0621491
rno-miR-211-3p	0	0	0	0	0	0	0	0	0	0	0	0	#N/A	#N/A	#N/A
rno-miR-212-3p	20	10	18	14	8	8	9	4	2	5	7	2	7.06683e-07	1.36988e-05	1.94204
rno-miR-21-3p	2232	1476	2237	704	1512	1181	1362	35	746	589	1046	832	8.75555e-05	0.00113149	1.61911
rno-miR-214-3p	60	28	45	61	33	23	35	102	51	39	74	65	0.792373	0.916982	-0.0676214
rno-miR-215	14	12	16	11	9	8	4	31	20	7	30	34	0.0974136	0.295762	-0.540257
rno-miR-21-5p	36520	32057	51424	26719	32357	21733	20471	22819	14780	17893	21079	18313	4.67295e-12	1.68226e-10	1.30518
rno-miR-218a-1-3p	5	4	4	8	7	2	6	19	14	9	16	15	0.0434315	0.180905	-0.762636
rno-miR-218a-5p	110	96	119	87	80	58	54	233	116	105	211	149	0.155426	0.410672	-0.283667
rno-miR-218b	7	7	7	3	4	5	5	4	7	5	12	10	0.758989	0.912643	0.124433
rno-miR-219a-1-3p	4	5	6	0	2	4	2	5	1	6	8	1	0.728742	0.901481	0.179065
rno-miR-219a-2-3p	4	3	2	2	1	1	1	4	7	6	10	6	0.0540808	0.201902	-0.930548
rno-miR-219a-5p	15	5	9	13	5	9	4	14	0	5	9	9	0.103696	0.306645	0.705463
rno-miR-219b	1	0	0	1	0	0	1	1	3	0	5	0	0.311447	0.617989	-0.612682
rno-miR-221-3p	914	721	562	819	607	421	556	802	399	390	658	469	2.65745e-05	0.000382673	0.898082
rno-miR-221-5p	67	34	26	27	38	19	21	19	36	25	34	26	0.00605041	0.0412082	0.77426
rno-miR-222-3p	479	462	475	350	412	258	333	215	301	266	287	399	7.39991e-07	1.38132e-05	1.02518
rno-miR-223-3p	148	89	85	32	57	48	32	79	82	75	79	73	0.166568	0.415595	0.355637
rno-miR-223-5p	9	7	6	5	8	2	5	1	5	13	5	3	0.244036	0.532442	0.542683
rno-miR-22-3p	108463	111693	134757	83851	66523	55966	51117	88311	135247	128414	146813	176691	0.731383	0.901481	-0.0655983
rno-miR-224-5p	3	8	2	1	1	1	4	4	2	2	4	5	0.584456	0.813548	0.283478
rno-miR-22-5p	52	33	25	43	13	15	11	65	40	27	49	21	0.961958	0.986052	-0.0147314
rno-miR-23a-3p	1336	500	565	394	427	367	309	1255	1219	523	828	663	0.581469	0.813548	-0.140607
rno-miR-23b-3p	2023	1464	1606	894	1162	970	864	3118	1801	1172	2491	1475	0.938756	0.977116	-0.0165296
rno-miR-24-1-5p	79	6	3	5	3	2	1	14	73	13	5	4	0.634339	0.852552	-0.284432
rno-miR-24-2-5p	1521	261	313	162	182	128	144	208	1360	240	261	317	#N/A	#N/A	-0.540311
rno-miR-24-3p	1850	1350	1168	1637	842	718	825	3348	1494	1213	2394	1754	0.496243	0.753056	-0.147683
rno-miR-25-3p	2493	2102	3003	2087	1776	1431	1530	3039	2395	2069	3963	3406	0.481199	0.746228	0.106036
rno-miR-25-5p	4	1	6	5	4	2	0	6	5	1	2	8	0.87746	0.945278	0.078502
rno-miR-26a-3p	52	29	31	26	17	30	8	59	29	44	59	46	0.481143	0.746228	-0.198778
rno-miR-26a-5p	27883	20995	24717	11957	12876	14899	12135	39747	47663	28385	38082	36860	0.00925782	0.0569017	-0.4848
rno-miR-26b-3p	66	27	67	43	22	21	16	77	115	51	57	56	0.155632	0.410672	-0.398263
rno-miR-26b-5p	2732	2823	3550	1469	1862	1721	1552	5715	3778	3243	5715	4476	0.0374696	0.162799	-0.395995
rno-miR-27a-3p	1730	683	875	570	479	447	440	1296	1241	650	1082	1018	0.896894	0.951128	0.02746
rno-miR-27a-5p	26	21	24	27	30	9	10	9	12	7	10	21	8.43604e-05	0.00111889	1.32132
rno-miR-27b-3p	16212	14721	21480	8628	9588	8749	7765	17082	23997	15727	25752	23694	0.322782	0.629793	-0.182625
rno-miR-27b-5p	39	32	66	32	29	28	25	37	45	46	54	58	0.497555	0.753056	0.164912
rno-miR-28-3p	3453	3935	4606	2440	3484	2315	2426	4774	5419	5855	9513	8003	0.069729	0.239071	-0.392523
rno-miR-28-5p	507	358	599	320	216	196	188	548	575	398	550	662	0.410526	0.690511	-0.139193
rno-miR-298-5p	0	1	3	1	2	0	2	0	3	4	1	0	0.83092	0.924768	0.128226
rno-miR-29a-3p	4030	2256	2005	2979	1351	1309	1335	3466	4258	1809	3182	3179	0.901555	0.952586	0.025992
rno-miR-29a-5p	24	8	8	12	5	6	9	22	6	14	19	12	0.879423	0.945278	0.0553609
rno-miR-29b-2-5p	5	3	11	9	3	3	5	29	10	9	10	10	0.14857	0.398181	-0.59691
rno-miR-29b-3p	291	110	146	101	69	66	67	181	224	104	193	155	0.94231	0.97721	0.016906
rno-miR-29c-3p	875	453	460	333	197	236	197	677	968	479	730	694	0.12978	0.361375	-0.336656
rno-miR-29c-5p	35	21	17	35	8	4	17	80	26	26	35	32	0.23462	0.522004	-0.423114
rno-miR-300-3p	9	16	14	14	8	11	6	22	17	8	21	14	0.815045	0.916982	0.0766475
rno-miR-301a-3p	1136	1086	1544	336	980	657	593	2026	1384	1819	2362	1833	0.10404	0.306645	-0.433897
rno-miR-301b-3p	4	1	4	1	9	5	3	19	9	3	10	3	0.492032	0.750903	-0.33979
rno-miR-3065-5p	44	49	49	22	26	28	17	53	45	46	82	53	0.583951	0.813548	-0.131417
rno-miR-3068-3p	224	231	293	97	188	141	111	314	353	320	392	439	0.101232	0.303696	-0.371499
rno-miR-3068-5p	7	3	5	3	2	3	0	13	2	6	10	8	0.2193	0.500124	-0.569774
rno-miR-3085	1	0	2	2	0	0	0	0	0	0	2	0	0.420982	0.697879	0.46255
rno-miR-30a-3p	919	1002	1481	898	627	562	569	399	1066	1067	1685	1540	0.540512	0.798141	0.166023
rno-miR-30a-5p	75162	80636	93652	57556	51042	42261	39812	156060	105307	90749	150046	123578	0.0104659	0.0606028	-0.38048
rno-miR-30b-3p	29	24	31	40	25	14	20	41	16	33	42	37	0.411018	0.690511	0.230667
rno-miR-30b-5p	4274	1188	1859	1143	930	774	723	2866	8089	1380	2695	1903	0.0877544	0.274709	-0.601328
rno-miR-30c-1-3p	131	105	134	90	70	45	51	97	211	172	162	225	0.0778361	0.251471	-0.4118
rno-miR-30c-2-3p	295	308	539	512	236	212	192	144	365	356	519	499	0.197646	0.467669	0.366269
rno-miR-30c-5p	15178	6511	7575	6182	4769	3597	3518	17026	24477	10255	14136	14463	0.00177974	0.0149498	-0.712473
rno-miR-30d-3p	129	130	180	57	78	72	73	152	178	155	174	222	0.381172	0.676107	-0.195656
rno-miR-30d-5p	12806	13464	15825	11687	8067	6944	7002	25681	18901	16569	23770	20163	0.00897982	0.0565729	-0.359388
rno-miR-30e-3p	828	1020	1546	631	558	505	486	326	1309	1237	1763	1855	0.666463	0.877017	-0.134306
rno-miR-30e-5p	17703	16260	16211	10223	9174	7239	6862	28441	27213	22257	29567	25944	1.40098e-05	0.000213968	-0.592999
rno-miR-3102	9	2	4	6	5	4	2	10	5	11	12	14	0.204457	0.479286	-0.520944
rno-miR-3120	4	3	12	6	0	2	5	5	3	4	3	8	0.366151	0.661434	0.437509
rno-miR-31a-5p	87	86	138	75	81	52	62	75	85	77	93	78	0.00357926	0.0281867	0.605856
rno-miR-320-3p	413	440	377	588	232	247	294	476	325	308	573	440	0.0404752	0.172877	0.431007
rno-miR-322-3p	173	106	224	72	99	94	83	162	302	150	189	199	0.578493	0.813548	-0.137249
rno-miR-322-5p	715	612	844	208	666	403	307	701	997	973	881	963	0.565077	0.804517	-0.160515
rno-miR-324-3p	34	44	43	27	20	17	19	39	37	21	22	43	0.122781	0.343786	0.405424
rno-miR-324-5p	114	59	41	80	30	37	53	149	52	44	141	55	0.852329	0.937346	0.0583006
rno-miR-32-5p	17	7	13	6	6	6	2	16	11	9	22	9	0.692644	0.885617	-0.143126
rno-miR-326-3p	41	35	45	91	24	24	43	67	49	45	59	54	0.348019	0.639276	0.276325
rno-miR-328a-3p	358	324	208	434	166	146	173	330	457	362	447	510	0.6074	0.827377	-0.117909
rno-miR-330-3p	16	10	7	8	2	8	3	19	14	11	20	12	0.300268	0.605672	-0.368478
rno-miR-330-5p	51	47	37	30	28	25	27	23	60	35	56	53	0.39405	0.680141	0.21962
rno-miR-331-3p	108	50	43	110	31	22	37	169	70	32	130	60	0.813271	0.916982	-0.080429
rno-miR-33-3p	18	6	3	2	4	5	2	17	29	2	8	6	0.332928	0.633191	-0.467184
rno-miR-335	62	16	21	11	13	6	16	22	78	22	30	30	0.425097	0.697879	-0.304016
rno-miR-33-5p	36	27	29	11	10	14	10	29	47	25	47	41	0.176939	0.435011	-0.373828
rno-miR-338-3p	47	50	52	25	27	29	18	59	51	51	85	58	0.42458	0.697879	-0.181665
rno-miR-339-3p	120	70	115	47	38	32	33	85	185	71	92	124	0.32521	0.629793	-0.265347
rno-miR-339-5p	169	125	102	151	61	64	78	242	140	96	220	169	0.716397	0.900409	-0.0797515
rno-miR-340-3p	20	9	17	12	15	7	6	16	28	17	27	30	0.275096	0.58012	-0.332168
rno-miR-340-5p	37	46	59	27	30	37	29	50	50	59	89	51	0.920982	0.967031	-0.0254845
rno-miR-341	3	1	0	0	0	0	0	2	1	1	0	0	0.963719	0.986052	-0.0268012
rno-miR-342-3p	622	159	167	207	127	83	116	622	458	219	313	222	0.34878	0.639276	-0.297338
rno-miR-342-5p	11	4	5	7	5	8	2	13	4	17	9	14	0.458178	0.72846	-0.308625
rno-miR-345-3p	167	104	104	159	82	62	81	56	110	100	215	103	0.0725179	0.241625	0.479027
rno-miR-345-5p	84	23	32	64	27	23	21	86	60	36	78	46	0.824161	0.921951	-0.0649204
rno-miR-3473	128	57	75	79	64	67	133	8	27	30	27	21	1.98729e-11	6.67731e-10	2.35353
rno-miR-34a-5p	29	37	30	43	32	16	25	99	41	60	52	50	0.217325	0.500124	-0.353484
rno-miR-34b-5p	6	8	12	2	9	9	9	8	4	4	9	2	0.016872	0.086465	1.04983
rno-miR-34c-5p	229	185	267	173	194	121	155	147	108	127	104	112	5.44611e-09	1.52491e-07	1.2235
rno-miR-350	6	6	4	8	1	1	2	8	5	1	5	2	0.417488	0.694435	0.397064
rno-miR-351-5p	2529	1977	2126	2102	1745	1239	1454	1791	2409	2280	2573	2676	0.102826	0.306645	0.282564
rno-miR-3543	0	0	0	2	1	2	2	1	0	0	3	1	0.455195	0.728311	0.453298
rno-miR-3553	298	315	258	208	170	110	139	1438	629	445	813	671	6.55322e-08	1.50128e-06	-1.25309
rno-miR-3556a	10	3	2	1	4	4	2	3	8	2	3	2	0.336759	0.633308	0.485215
rno-miR-3556b	923	413	406	397	209	212	190	372	1114	323	528	568	0.812448	0.916982	-0.0686018
rno-miR-3557-3p	182	119	89	218	71	62	72	352	126	117	353	132	0.409465	0.690511	-0.252811
rno-miR-3557-5p	19226	19881	28163	20136	13698	11685	10800	37651	25549	24955	48659	31801	0.065252	0.229784	-0.314772
rno-miR-3559-3p	11	12	15	17	3	9	10	17	11	9	15	12	0.287462	0.59017	0.363461
rno-miR-3559-5p	47	43	78	28	35	38	24	70	52	50	96	51	0.974614	0.992069	0.0080034
rno-miR-3560	5	6	3	6	1	0	1	11	4	2	1	6	0.893631	0.951128	-0.069717
rno-miR-3570	107	127	175	99	71	71	62	175	122	155	184	191	0.551517	0.798141	-0.119071
rno-miR-3571	0	0	1	0	0	0	0	0	0	0	0	0	0.738714	0.901481	0.135598
rno-miR-3574	52	61	88	69	24	34	36	70	70	54	117	75	0.898287	0.951128	0.0303576
rno-miR-3577	5	4	11	3	4	0	2	1	9	8	7	4	0.988644	0.992224	-0.00695901
rno-miR-3585-3p	20	2	24	6	9	6	9	5	30	10	19	9	0.810329	0.916982	0.103375
rno-miR-3585-5p	71	86	110	40	46	53	46	167	129	153	296	177	0.000370332	0.00405755	-0.856438
rno-miR-3586-3p	3655	2186	2828	1435	1221	1031	998	4078	5049	2335	4111	4106	0.00963534	0.0585086	-0.507679
rno-miR-3587	331	125	168	113	72	77	76	213	258	121	218	194	0.883385	0.945278	-0.0343291
rno-miR-3588	5868	1349	1086	1614	795	523	630	2184	5415	1494	1786	1965	0.592652	0.815721	-0.200597
rno-miR-3589	128	28	33	52	23	19	15	94	164	39	70	51	0.201727	0.475095	-0.464552
rno-miR-3590-3p	0	0	0	0	0	0	0	0	0	0	1	1	0.871157	0.945278	-0.0659893
rno-miR-3590-5p	1049	996	2132	621	749	657	626	1042	1412	1271	1498	1699	0.821728	0.921951	0.0533954
rno-miR-3596a	59760	52935	59888	48943	34719	28836	26475	44183	56427	38616	64666	58712	0.00745909	0.0494655	0.348047
rno-miR-3596b	2016	1231	1751	1081	838	741	670	1805	2106	1259	1746	1825	0.95788	0.986052	-0.00798394
rno-miR-3596c	665	655	690	543	365	364	341	549	683	471	757	733	0.0384969	0.165833	0.293216
rno-miR-3596d	918	917	1046	541	393	531	431	577	1087	532	1308	1206	0.54716	0.798141	0.136674
rno-miR-361-3p	22	31	29	30	24	22	16	47	46	46	53	57	0.141923	0.386645	-0.36052
rno-miR-361-5p	26	14	12	8	7	4	6	32	32	15	25	20	0.0656527	0.229784	-0.591179
rno-miR-362-3p	45	29	19	22	19	10	16	27	26	13	34	25	0.113677	0.327388	0.43429
rno-miR-362-5p	24	3	5	5	2	2	1	5	4	7	6	5	0.369805	0.665649	0.433674
rno-miR-363-3p	53	28	37	22	38	21	16	46	45	45	55	57	0.679021	0.879759	-0.10136
rno-miR-365-3p	42	8	11	21	6	6	9	61	32	21	35	33	0.0433564	0.180905	-0.713765
rno-miR-365-5p	2	0	2	0	2	0	2	3	3	1	0	4	0.733092	0.901481	-0.202012
rno-miR-374-3p	51	36	26	13	22	27	16	26	43	40	60	51	0.763035	0.913467	-0.0874941
rno-miR-374-5p	102	36	26	69	16	18	23	38	55	26	32	36	0.0723351	0.241625	0.593448
rno-miR-375-3p	11	24	27	16	20	10	13	91	73	40	37	44	0.00135654	0.0122089	-1.01844
rno-miR-378a-3p	26232	27583	37257	27759	19590	16034	14954	56226	37820	37410	71695	47840	0.0112112	0.0634881	-0.426977
rno-miR-378a-5p	209	128	103	238	76	67	83	392	146	132	402	149	0.355814	0.647401	-0.279734
rno-miR-378b	8	11	8	6	10	4	6	12	9	7	17	18	0.815095	0.916982	-0.0839822
rno-miR-379-5p	5	4	5	5	5	3	3	8	15	4	13	6	0.327833	0.629793	-0.407701
rno-miR-381-3p	11	11	27	9	13	6	8	6	15	11	17	18	0.256897	0.544018	0.402939
rno-miR-382-3p	0	2	1	1	0	1	0	3	1	0	1	2	0.773673	0.916982	-0.174406
rno-miR-382-5p	7	7	11	11	1	1	4	8	11	6	11	11	0.83119	0.924768	-0.0867516
rno-miR-383-5p	2	6	0	2	2	0	0	0	0	2	2	3	0.439794	0.71502	0.464657
rno-miR-409a-3p	4	10	4	8	7	4	1	8	8	7	12	9	0.876395	0.945278	-0.0638604
rno-miR-409b	56	51	57	58	31	20	18	73	49	73	90	79	0.282053	0.584998	-0.25026
rno-miR-410-3p	37	37	45	44	20	14	12	24	37	40	51	65	0.990255	0.992224	0.003445
rno-miR-411-5p	54	55	109	25	28	28	22	85	93	60	117	134	0.0625516	0.224671	-0.512667
rno-miR-421-3p	81	94	171	38	81	58	55	147	182	135	177	162	0.183031	0.443551	-0.348497
rno-miR-423-3p	379	423	472	267	225	187	213	40	535	619	370	797	0.838062	0.93036	-0.0800306
rno-miR-423-5p	256	228	354	252	189	142	128	277	286	477	339	424	0.48738	0.748901	-0.160771
rno-miR-425-3p	12	9	1	9	3	4	6	12	14	7	7	7	0.986164	0.992069	0.00726796
rno-miR-425-5p	381	291	298	211	181	154	141	430	366	322	407	459	0.218908	0.500124	-0.17365
rno-miR-429	1080	874	514	629	515	409	434	1037	1177	714	1360	1272	0.300432	0.605672	-0.190512
rno-miR-434-3p	0	0	0	0	1	2	2	1	0	0	3	1	0.705688	0.889626	0.228507
rno-miR-449a-5p	11	10	7	7	8	5	3	4	2	4	2	4	0.000648236	0.00653422	1.4869
rno-miR-450a-5p	73	42	50	45	34	35	22	70	38	40	83	53	0.389857	0.67981	0.195132
rno-miR-451-5p	383	369	254	535	93	76	167	1206	613	328	482	564	0.0523789	0.197007	-0.652981
rno-miR-455-3p	79	57	42	71	34	19	29	203	93	60	105	72	0.051006	0.197007	-0.560211
rno-miR-455-5p	28	20	37	14	14	12	11	55	24	43	64	30	0.0553088	0.204968	-0.55836
rno-miR-466b-2-3p	5	3	0	13	4	4	5	2	1	1	3	2	0.0038557	0.0298965	1.54699
rno-miR-466c-5p	4	14	7	6	11	4	3	5	4	9	8	4	0.108592	0.318201	0.700676
rno-miR-484	244	21	19	31	26	22	26	70	316	39	49	49	#N/A	#N/A	-1.10934
rno-miR-488-3p	0	1	2	2	4	1	0	5	7	4	7	2	0.122016	0.343553	-0.835486
rno-miR-489-3p	34	18	23	6	8	15	17	23	36	14	33	26	0.982354	0.992069	-0.00713986
rno-miR-490-3p	3	2	2	0	2	1	0	3	0	5	2	3	0.674734	0.879759	-0.241365
rno-miR-494-3p	8	1	5	4	2	0	0	2	7	2	5	1	0.789764	0.916982	0.14529
rno-miR-496-3p	7	1	3	9	1	2	0	10	4	7	7	6	0.386347	0.676107	-0.42319
rno-miR-497-5p	508	194	375	122	194	126	145	379	1153	281	377	463	0.0628544	0.224671	-0.598983
rno-miR-499-3p	13	10	9	4	1	3	2	8	15	3	11	9	0.846863	0.934209	-0.0817841
rno-miR-499-5p	27	24	25	13	11	16	18	50	49	38	55	56	0.00249428	0.0199542	-0.73585
rno-miR-500-3p	22	10	3	10	6	6	5	25	12	7	12	10	0.998602	0.998602	0.000684623
rno-miR-501-3p	9	8	6	6	3	0	1	17	6	2	5	6	0.874404	0.945278	-0.07484
rno-miR-503-3p	48	25	24	18	12	12	15	17	42	24	21	31	0.493152	0.750903	0.20765
rno-miR-504	124	125	138	137	68	73	74	65	130	112	237	191	0.588784	0.814138	0.137179
rno-miR-505-3p	200	19	21	34	10	11	16	81	247	26	53	36	0.348234	0.639276	-0.505227
rno-miR-532-3p	29	18	11	26	15	8	19	25	15	13	35	24	0.328642	0.629793	0.307387
rno-miR-532-5p	297	282	333	198	272	188	191	34	260	321	637	418	0.55739	0.800355	0.220268
rno-miR-541-5p	270	236	418	253	162	122	114	261	306	337	364	414	0.811938	0.916982	-0.0494557
rno-miR-542-3p	169	161	247	114	185	109	102	216	146	154	256	164	0.111861	0.324011	0.354017
rno-miR-542-5p	26	23	39	13	20	11	11	29	23	21	29	44	0.840926	0.931488	0.0567904
rno-miR-547-5p	5	12	5	3	4	4	2	9	16	4	19	12	0.187092	0.449454	-0.547715
rno-miR-582-3p	65	64	103	83	48	50	35	6	97	89	199	88	0.94028	0.977116	0.0298597
rno-miR-582-5p	23	9	12	18	6	6	8	22	10	7	18	10	0.308759	0.617518	0.354339
rno-miR-598-3p	26	19	20	28	9	7	18	25	17	18	42	23	0.650554	0.86284	0.136436
rno-miR-615	10	6	10	3	6	2	7	0	5	7	6	17	0.467648	0.738855	0.342014
rno-miR-6215	24	10	4	9	1	8	15	0	7	7	13	6	0.0423133	0.179209	0.986559
rno-miR-6315	2	3	9	4	4	4	3	1	7	2	11	6	0.627887	0.848405	0.232119
rno-miR-6328	3	4	7	5	4	3	5	0	4	0	2	12	0.159485	0.41162	0.739484
rno-miR-6329	64	43	90	36	37	26	26	32	80	61	130	97	0.446485	0.721245	-0.215968
rno-miR-652-3p	226	132	112	290	65	82	88	159	117	75	187	112	0.0145875	0.0773906	0.688396
rno-miR-653-5p	81	50	91	37	31	29	31	26	94	50	93	92	0.89452	0.951128	0.0382147
rno-miR-664-2-5p	20	25	21	25	10	14	9	21	24	19	29	37	0.8812	0.945278	0.0420649
rno-miR-664-3p	17	19	16	8	11	9	14	72	31	20	43	22	0.0192588	0.0961034	-0.771326
rno-miR-667-3p	10	1	0	5	2	0	0	6	3	3	2	1	0.825	0.921951	0.127201
rno-miR-671	21	28	29	19	14	16	16	27	37	34	35	44	0.47231	0.743888	-0.187922
rno-miR-672-3p	4	3	7	4	5	0	1	5	7	9	6	13	0.210695	0.491621	-0.572521
rno-miR-672-5p	77	79	91	108	65	52	50	63	71	52	108	61	0.00186812	0.015435	0.684611
rno-miR-674-3p	56	52	44	36	25	18	22	52	86	33	78	81	0.248202	0.539197	-0.275926
rno-miR-674-5p	15	10	16	9	8	4	10	25	19	11	20	14	0.561997	0.803955	-0.184447
rno-miR-702-3p	14	14	10	17	11	3	10	13	17	18	15	14	0.726437	0.901481	0.117097
rno-miR-708-3p	45	16	45	11	19	10	11	21	32	24	24	29	0.401504	0.688292	0.263243
rno-miR-708-5p	37	19	16	20	21	7	14	18	10	7	13	18	0.00107306	0.00983318	1.0462
rno-miR-743b-3p	0	0	0	0	0	2	0	0	1	0	0	0	0.685921	0.881898	0.20779
rno-miR-760-3p	3	4	2	4	0	5	2	3	1	1	1	2	0.0565727	0.206613	1.0469
rno-miR-7a-1-3p	33	8	8	10	7	7	4	35	20	25	22	26	0.0605406	0.219514	-0.654691
rno-miR-7a-5p	16	17	6	9	16	11	5	39	18	15	23	24	0.281729	0.584998	-0.370835
rno-miR-802-3p	11	22	33	11	16	8	5	22	24	5	19	23	0.450041	0.722359	0.273309
rno-miR-802-5p	69	13	15	1	8	7	8	24	50	15	18	9	0.931613	0.974272	-0.040304
rno-miR-872-3p	265	87	176	93	69	58	63	143	227	116	192	132	0.964531	0.986052	0.011029
rno-miR-872-5p	427	386	434	187	253	237	192	272	483	357	482	517	0.627864	0.848405	0.105254
rno-miR-874-3p	133	74	74	97	22	11	21	87	141	77	67	101	0.581373	0.813548	-0.18922
rno-miR-874-5p	8	8	14	8	7	4	8	15	12	13	13	26	0.350823	0.640634	-0.323727
rno-miR-877	9	4	16	13	3	6	1	4	10	7	5	9	0.238362	0.522323	0.511528
rno-miR-879-5p	16	19	12	13	9	8	5	5	17	20	19	24	0.962651	0.986052	0.0165318
rno-miR-92a-1-5p	69	36	52	45	49	34	39	20	18	35	23	36	2.07894e-06	3.7421e-05	1.32911
rno-miR-92a-3p	948	1048	1273	1194	953	723	879	457	954	1123	1519	1484	0.0732316	0.241625	0.481984
rno-miR-92b-3p	13	15	27	15	14	9	9	18	22	19	23	45	0.551045	0.798141	-0.187194
rno-miR-93-3p	15	7	5	5	5	9	2	17	18	16	10	15	0.163304	0.41162	-0.525723
rno-miR-93-5p	950	923	1339	653	918	694	643	2276	1374	1404	2262	1840	0.0488869	0.196067	-0.399862
rno-miR-96-5p	3	8	6	5	1	3	1	24	5	11	9	19	0.0175825	0.0886158	-1.0521
rno-miR-98-3p	30	26	19	10	19	15	18	20	48	29	33	38	0.597494	0.81609	-0.158703
rno-miR-98-5p	1195	964	938	973	649	613	602	882	814	652	1292	811	0.000225698	0.00264539	0.548556
rno-miR-99a-3p	50	37	65	35	45	21	22	66	84	63	93	82	0.085486	0.269281	-0.382648
rno-miR-99a-5p	1440	430	392	465	242	181	185	1290	1453	382	768	706	0.160458	0.41162	-0.464518
rno-miR-99b-3p	58	50	92	56	47	45	46	89	46	49	84	90	0.217676	0.500124	0.287897
rno-miR-99b-5p	12289	10036	8925	11138	5171	3899	5261	34632	11041	9209	17376	13923	0.0714609	0.241625	-0.475095
rno-miR-9a-5p	70	73	87	65	38	30	40	104	75	76	114	76	0.804871	0.916982	-0.0490838
rno-miR-9b-3p	12	9	15	15	4	7	9	21	17	9	30	5	0.876235	0.945278	-0.0579333
aca-miR-10c-5p	15	21	35	16	9	4	3	25	19	18	19	15	0.79008	0.916982	0.0937401
aca-miR-5450	0	0	0	0	0	0	0	0	0	0	0	0	#N/A	#N/A	#N/A
aga-miR-1175#aae-miR-1175-3p	0	0	0	0	0	0	0	0	0	0	0	0	#N/A	#N/A	#N/A
ame-miR-3776	54	12	30	32	12	13	19	2	9	3	2	8	2.61641e-10	7.7569e-09	2.51718
ame-miR-3782	0	0	0	0	1	0	0	0	0	0	1	0	0.860356	0.942651	0.0796652
ath-miR5021	1	0	2	2	0	0	1	0	1	0	2	0	0.424867	0.697879	0.480789
ath-miR5658	1	0	5	1	3	1	3	0	2	2	0	4	0.31491	0.622411	0.589091
ath-miR833a-3p#aly-miR833-3p	0	0	0	0	0	0	0	0	0	0	0	0	#N/A	#N/A	#N/A
bfl-miR-10a-3p#bbe-miR-10a-3p	8	8	8	8	5	2	4	5	15	18	22	9	0.168433	0.418068	-0.544634
blv-miR-B3-3p	51	14	16	26	10	10	9	62	56	32	40	30	0.0516344	0.197007	-0.622802
bmo-miR-2779	2	6	4	3	2	3	8	0	6	1	23	6	0.980172	0.992069	-0.0133105
bmo-miR-2840	0	0	0	0	0	0	0	0	0	0	0	0	#N/A	#N/A	#N/A
bta-miR-1434-5p	174	9	10	10	17	10	10	14	152	9	12	5	#N/A	#N/A	-0.806172
bta-miR-1940	24	18	16	20	28	16	15	44	11	25	14	12	0.197598	0.467669	0.472746
bta-miR-2340	13405	26784	21399	47163	24353	18411	26269	1085	5747	16837	7477	10296	9.53499e-06	0.000150176	1.89015
bta-miR-2478	175	212	198	100	58	109	112	248	429	155	395	425	0.0210109	0.103819	-0.607801
bta-miR-2487	549	123	301	541	106	109	198	7	125	34	102	89	3.5838e-07	7.52598e-06	2.13893
bta-miR-26c	27057	20157	23125	11315	12152	14314	11632	38307	46585	26942	36323	35401	0.0091646	0.0569017	-0.495553
bta-miR-2887	148	26	93	155	33	26	47	2	10	6	13	12	1.58784e-15	1.00034e-13	3.18353
bta-miR-2889	764	56	134	349	61	30	95	2	6	3	6	7	1.67753e-23	2.81825e-21	4.65523
bta-miR-2898	344	169	152	343	85	119	183	330	261	98	360	228	0.361735	0.655807	0.269332
bta-miR-2904	170	56	184	130	56	26	50	6	22	8	24	28	2.83306e-14	1.58651e-12	2.67487
bta-miR-2957	169	74	55	116	46	38	51	95	71	41	103	87	0.045501	0.187971	0.529904
bta-miR-3596	4338	2873	3104	3997	1508	1338	1483	3018	3560	1626	3009	2428	0.0169842	0.086465	0.499918
bta-miR-3600	107176	110358	132871	82793	65605	55276	50500	86977	133580	126567	144821	174261	0.737266	0.901481	-0.0641128
bta-miR-3601	26	23	38	13	20	10	10	29	23	21	28	43	0.887063	0.947202	0.0404313
bta-miR-3604#ipu-miR-199b	2712	2324	2947	1679	1415	1366	1408	3368	2557	2572	3119	3725	0.757312	0.912643	-0.0459
bta-miR-669	59	33	25	70	24	24	30	94	73	36	74	52	0.584938	0.813548	-0.157647
cgr-miR-1260	136	107	109	87	58	64	69	296	167	79	249	216	0.0269473	0.125754	-0.503338
cgr-miR-1285	388	388	267	492	417	89	423	1139	382	321	426	386	0.809615	0.916982	0.0843134
cgr-miR-1973	2	0	0	1	1	2	1	0	0	1	0	0	0.0749409	0.243679	1.0714
cin-miR-3575-5p	102	76	37	71	32	30	38	190	107	62	151	90	0.0674706	0.234518	-0.496436
cin-miR-4171-5p	7	3	3	10	2	3	4	1	0	0	4	2	0.00152785	0.0132765	1.69923
cpa-miR8154	0	0	0	0	0	0	0	0	0	0	0	0	#N/A	#N/A	#N/A
crm-miR-7594	0	0	0	0	0	0	0	0	0	0	0	0	#N/A	#N/A	#N/A
dme-miR-10-3p#bmo-miR-10-3p#tca-miR-10-3p#cqu-miR-10-3p#mse-miR-10a	9321	11260	10966	9139	7483	5128	4844	9129	11706	11664	18444	15267	0.706053	0.889626	-0.0713807
dme-miR-4949-5p	1	0	1	1	4	2	0	2	0	1	1	0	0.229043	0.51999	0.72841
dps-miR-1002-3p	9	4	8	2	3	1	4	4	4	14	3	6	0.937444	0.977116	-0.0374517
dre-miR-125a#fru-miR-125a#tni-miR-125a#xtr-miR-125a#aca-miR-125a-5p#ola-miR-125a-5p#ipu-miR-125a	16	5	4	5	3	4	1	6	14	7	6	9	0.79485	0.916982	-0.112571
eca-miR-1271	3	3	2	5	2	1	2	9	7	4	13	6	0.0787502	0.252803	-0.806558
gga-miR-1692	21	34	36	36	18	35	20	15	12	16	7	17	2.54432e-06	4.42185e-05	1.58211
gga-miR-1731-3p	0	0	0	0	0	0	0	0	0	0	0	0	#N/A	#N/A	#N/A
gga-miR-1766	873	807	864	584	648	725	929	1659	1331	1344	982	900	0.970805	0.990457	-0.00996518
gga-miR-365b-5p	4	1	1	3	1	0	2	0	2	1	0	0	0.0733503	0.241625	1.07851
gga-miR-6651-5p	0	0	1	4	1	0	3	0	1	0	2	0	0.160951	0.41162	0.850149
gma-miR4387b	0	0	0	0	0	0	0	0	0	0	0	0	#N/A	#N/A	#N/A
hbr-miR482	0	0	0	0	0	0	0	0	0	0	0	0	#N/A	#N/A	#N/A
hcmv-miR-US25-1-3p	4	8	8	4	3	2	1	21	4	7	7	9	0.255421	0.543174	-0.508498
hco-miR-5978	121	79	89	85	73	87	182	168	54	93	186	80	0.118087	0.33622	0.542258
hhi-miR-7641	649	215	609	575	355	243	275	72	98	96	211	70	2.70149e-17	1.94507e-15	2.3826
hhv6b-miR-Ro6-1-3p	57	5	12	38	6	2	16	1	12	0	4	6	0.000203076	0.00243691	1.92562
hsa-miR-103b	3205	3941	5953	2783	2810	2065	1972	7364	3831	3682	6934	4811	0.637545	0.854581	-0.0992978
hsa-miR-1248#ptr-miR-1248#bta-miR-1248#ppy-miR-1248	6	2	1	5	7	2	2	5	2	2	3	4	0.213438	0.495726	0.62583
hsa-miR-1271-3p	9	2	2	1	5	3	0	2	3	1	5	8	0.643864	0.860763	0.244359
hsa-miR-1273g-3p	420	540	404	471	782	114	553	1568	969	819	295	718	0.589604	0.814138	-0.206532
hsa-miR-1303#ptr-miR-1303	710	645	490	678	793	159	684	1717	1068	806	608	797	0.780915	0.916982	-0.0915557
hsa-miR-148a-3p#mmu-miR-148a-3p#gga-miR-148a-3p#ssc-miR-148a-3p#bta-miR-148a#xtr-miR-148a#oan-miR-148-3p#mml-miR-148a-3p#cfa-miR-148a#ptr-miR-148a#mdo-miR-148-3p#eca-miR-148a#tgu-miR-148-3p#ppy-miR-148a#aca-miR-148a-3p#oar-miR-148a	4742	4802	6288	2514	5228	4211	3183	3699	6606	7405	14437	10677	0.404801	0.690511	-0.247
hsa-miR-148a-5p#mmu-miR-148a-5p#ssc-miR-148a-5p#mml-miR-148a-5p	229	229	340	178	161	168	136	43	236	248	486	309	0.486308	0.748901	0.237647
hsa-miR-1973	0	1	3	1	1	0	1	1	1	1	1	1	0.595606	0.815721	0.320346
hsa-miR-3168	465	98	122	130	328	61	86	107	108	113	203	87	0.00452957	0.0326129	1.03322
hsa-miR-3184-3p	211	188	299	189	158	117	113	217	221	363	267	325	0.770379	0.916982	-0.0666294
hsa-miR-3184-5p	90	118	95	74	34	44	49	12	26	12	23	27	2.15776e-17	1.81252e-15	2.29885
hsa-miR-3195	65	8	30	54	13	13	39	0	28	3	6	15	0.000397951	0.00417849	1.73353
hsa-miR-3529-3p	16	16	5	9	15	9	5	34	15	14	19	22	0.408689	0.690511	-0.289557
hsa-miR-3607-5p	305	64	59	18	54	53	66	116	419	109	85	76	0.417166	0.694435	-0.351878
hsa-miR-3692-3p	0	0	0	0	0	1	0	0	0	0	0	0	0.738714	0.901481	0.135598
hsa-miR-378g	6	5	8	7	2	5	3	8	6	2	10	6	0.531061	0.789541	0.264026
hsa-miR-4286#bta-miR-4286	36	19	9	27	1	3	10	26	12	4	25	16	0.449142	0.722359	0.331889
hsa-miR-4301	44	34	44	45	17	24	18	33	18	20	39	34	0.00428926	0.031791	0.725674
hsa-miR-4448	59	98	67	216	109	114	121	2	23	55	21	37	6.10775e-07	1.23132e-05	2.22947
hsa-miR-4454	263	38	126	126	44	51	95	113	78	10	120	16	0.0105814	0.0606028	1.07886
hsa-miR-4485	26	17	35	25	18	6	14	3	5	0	5	3	1.5832e-12	6.64944e-11	2.81769
hsa-miR-4492	73	2	23	24	1	3	11	0	2	0	0	2	3.3915e-05	0.000474809	2.4758
hsa-miR-4497	11	4	8	16	6	2	9	7	6	2	12	5	0.0522319	0.197007	0.828828
hsa-miR-4502	0	0	0	0	0	0	0	0	0	0	0	0	#N/A	#N/A	#N/A
hsa-miR-4508	51	1	13	18	0	4	1	0	3	2	0	3	0.0133129	0.0729313	1.5014
hsa-miR-4523	6	9	11	8	7	2	1	2	13	3	4	11	0.386045	0.676107	0.397059
hsa-miR-4532	11	1	5	3	0	1	5	0	2	0	0	2	0.00504916	0.0353441	1.63806
hsa-miR-4792	1411	390	942	1072	289	542	459	56	47	23	64	36	3.73499e-50	1.88243e-47	4.30912
hsa-miR-486-3p#mmu-miR-486-3p#mml-miR-486-3p#eca-miR-486-3p	3	5	7	6	6	4	4	11	9	8	14	22	0.111366	0.324011	-0.622185
hsa-miR-486-5p#mmu-miR-486-5p#mml-miR-486-5p#ptr-miR-486#bta-miR-486#eca-miR-486-5p#ssc-miR-486#mmu-miR-3107-5p#ppy-miR-486-5p#cgr-miR-486-5p#ggo-miR-486	2438	4606	4227	5157	1823	893	2020	16716	6345	4510	6229	11330	0.00452948	0.0326129	-0.916847
hsa-miR-5585-3p	10	2	9	3	3	2	1	3	16	7	6	2	0.726046	0.901481	-0.171628
hsa-miR-574-3p#mmu-miR-574-3p#cfa-miR-574#ssc-miR-574#ggo-miR-574	74	38	34	79	33	30	39	109	88	44	91	62	0.677439	0.879759	-0.112799
hsa-miR-589-5p#mml-miR-589#ppy-miR-589	2	0	1	7	0	4	0	1	2	1	1	0	0.136771	0.376681	0.895526
hsa-miR-619-5p	0	0	0	0	0	0	1	1	0	0	0	0	0.853654	0.937346	0.0861549
hsa-miR-6797-5p	0	0	0	0	0	0	0	0	0	0	0	0	#N/A	#N/A	#N/A
hsa-miR-718#ptr-miR-718	33	4	12	26	3	6	5	0	8	0	3	8	0.000849006	0.00822883	1.70693
hsa-miR-7641	135	62	153	180	113	53	60	5	24	15	56	14	2.02371e-12	7.84577e-11	2.5796
hsa-miR-7704	57	19	53	47	13	10	33	1	64	13	22	59	0.279241	0.584998	0.498379
hsa-miR-7847-3p	1	0	0	0	1	0	0	0	0	0	0	1	0.685142	0.881898	0.208624
hsa-miR-7977	26	19	23	25	10	6	30	49	38	11	30	24	0.919331	0.967031	0.0353713
hsv1-miR-H17	19	8	15	22	3	3	6	0	6	3	5	6	0.00036829	0.00405755	1.61622
ipu-miR-16c	7	5	3	0	2	3	1	2	3	6	5	10	0.69145	0.885617	-0.199589
mdo-miR-7341-5p	45	32	54	37	47	31	53	42	36	27	24	27	0.000318578	0.00364917	1.05555
mdo-miR-7371c-5p	21	7	6	5	9	3	5	1	21	19	13	14	0.594658	0.815721	-0.237114
mml-miR-7164-5p	0	0	0	0	0	0	0	1	0	0	0	0	0.983586	0.992069	0.00836338
mmu-let-7g-5p#hsa-let-7g-5p#bta-let-7g#oan-let-7g-5p#mml-let-7g-5p#cfa-let-7g#ptr-let-7g#eca-let-7g#ssc-let-7g#tgu-let-7g-5p#ppy-let-7g#aca-let-7g#cgr-let-7g-5p	96	114	99	43	100	45	61	188	176	140	212	230	0.0141489	0.0766777	-0.588296
mmu-miR-1187	7	3	1	15	2	3	7	3	0	1	4	2	0.0039936	0.0303221	1.5421
mmu-miR-1195	30	18	21	40	15	19	26	16	16	6	18	18	7.23565e-05	0.000985613	1.27647
mmu-miR-1247-5p#hsa-miR-1247-5p#ptr-miR-1247#ppy-miR-1247#mml-miR-1247-5p	12	12	5	9	6	4	5	4	9	13	7	9	0.38458	0.676107	0.34442
mmu-miR-142b	127	46	31	24	29	24	14	17	67	26	27	26	0.0497948	0.196067	0.728142
mmu-miR-149-5p#hsa-miR-149-5p#mml-miR-149-5p#ptr-miR-149#cfa-miR-149#eca-miR-149#ppy-miR-149#ssc-miR-149#ggo-miR-149#bta-miR-149-5p	34	8	27	12	7	3	9	3	35	11	18	19	0.701791	0.8887	0.161826
mmu-miR-16-1-3p#oan-miR-16a-3p	10	10	10	5	8	6	8	3	3	12	8	13	0.161975	0.41162	0.571457
mmu-miR-1895	3	2	2	8	1	1	0	0	3	2	1	1	0.149318	0.398181	0.83424
mmu-miR-1940	0	1	2	4	1	3	1	0	1	0	1	0	0.0218248	0.106263	1.38723
mmu-miR-1957a	15	19	25	17	12	19	9	1	3	6	11	6	2.9369e-07	6.43564e-06	1.98862
mmu-miR-1983	20	6	17	10	13	10	11	10	7	7	5	5	0.000389582	0.00417765	1.31687
mmu-miR-2137	205	26	51	107	20	22	36	1	1	0	5	5	1.56453e-19	1.57705e-17	4.20528
mmu-miR-30f	75	55	158	61	34	49	28	46	106	62	133	101	0.741651	0.902879	0.0977046
mmu-miR-3470a	0	2	1	2	1	0	5	1	2	0	2	0	0.187272	0.449454	0.793872
mmu-miR-3470b	8	6	1	20	5	16	14	14	0	5	12	4	0.0461616	0.18915	1.02973
mmu-miR-3472	1	1	1	1	1	1	0	2	1	0	0	1	0.550427	0.798141	0.362449
mmu-miR-3473a	1	1	3	3	0	1	1	0	0	2	1	2	0.31043	0.617989	0.607271
mmu-miR-3473b	4	2	1	1	2	2	3	2	0	1	1	0	0.0303229	0.138934	1.26426
mmu-miR-3535	191	166	188	179	160	54	81	275	232	201	136	165	0.800655	0.916982	0.0644217
mmu-miR-3963	3	5	2	1	5	1	2	0	3	5	4	5	0.698912	0.887283	0.20383
mmu-miR-3968	6	8	4	2	1	2	4	6	6	6	11	7	0.542586	0.798141	-0.267174
mmu-miR-466i-5p	8	2	4	4	5	2	3	2	4	0	4	3	0.0520039	0.197007	0.970388
mmu-miR-5099	27	8	19	10	11	3	11	3	21	4	2	15	0.0565322	0.206613	0.852552
mmu-miR-5100	8	2	1	5	2	3	2	2	2	1	9	2	0.326269	0.629793	0.513203
mmu-miR-5106	0	0	19	0	10	13	6	0	0	7	0	13	0.474004	0.744231	0.390489
mmu-miR-5119	0	0	1	0	4	42	0	2	0	5	0	1	0.682729	0.881898	-0.245648
mmu-miR-5126	54	5	5	22	2	3	9	0	3	0	2	3	3.28392e-06	5.51699e-05	2.51225
mmu-miR-6236	31	14	43	24	6	5	26	10	34	11	32	24	0.236687	0.522004	0.454016
mmu-miR-6238	15	2	8	17	11	1	13	1	5	3	12	5	0.0101153	0.059784	1.2433
mmu-miR-6239	58	17	62	57	28	16	24	3	13	8	7	6	1.15272e-12	5.28154e-11	2.57363
mmu-miR-6240	2741	522	1501	2667	472	997	578	53	70	31	129	23	2.44916e-32	6.17189e-30	4.47303
mmu-miR-6343	0	0	0	0	0	0	0	0	0	0	0	1	0.983586	0.992069	0.00836338
mmu-miR-6412	13	10	9	4	8	5	6	15	28	6	11	21	0.28923	0.59017	-0.395244
mmu-miR-682	1	1	0	1	0	0	0	0	0	0	0	0	0.395903	0.681007	0.434784
mmu-miR-690	14	11	3	9	7	5	14	27	12	8	6	8	0.649061	0.86284	0.192113
mmu-miR-6937-5p	76	12	48	89	30	21	29	1	17	2	16	6	8.14683e-09	2.16105e-07	2.51237
mmu-miR-6971-3p	0	0	0	0	0	1	1	0	0	0	0	0	0.524866	0.784962	0.318308
mmu-miR-709	5	0	9	3	0	2	5	3	1	2	1	2	0.0643213	0.228295	1.028
mmu-miR-7225-5p	0	0	0	0	0	0	0	0	0	0	0	0	#N/A	#N/A	#N/A
mmu-miR-744-3p#hsa-miR-744-3p	3	4	3	6	3	3	0	7	6	3	10	8	0.378718	0.676107	-0.403013
mmu-miR-744-5p#hsa-miR-744-5p#ptr-miR-744#bta-miR-744#ssc-miR-744#ppy-miR-744	88	109	120	78	60	32	54	196	99	130	130	151	0.189573	0.452818	-0.29826
mmu-miR-7667-3p	0	3	0	3	0	2	1	0	1	0	2	0	0.158412	0.41162	0.855987
mmu-miR-7667-5p	48	25	34	34	8	39	42	5	5	8	13	6	1.47134e-10	4.63471e-09	2.49135
mmu-miR-7687-5p	1	0	0	0	0	0	0	0	1	0	0	0	0.874503	0.945278	0.066361
mne-miR-140	10	11	25	15	8	6	11	14	18	4	20	17	0.324154	0.629793	0.345196
oan-miR-1386	102	83	93	64	22	46	84	120	268	48	161	179	0.163341	0.41162	-0.456524
oan-miR-30f	8	12	10	5	2	3	3	21	7	10	27	12	0.0917486	0.28025	-0.660832
oan-miR-7427-5p	0	0	0	0	0	0	0	0	0	0	0	0	#N/A	#N/A	#N/A
oan-miR-92d	1	0	0	0	0	0	0	0	1	1	1	0	0.736899	0.901481	-0.181932
pma-miR-192-5p	8	10	17	8	5	3	8	26	14	20	25	26	0.0229371	0.109059	-0.752209
ppc-miR-2241a	0	0	0	0	0	0	0	0	0	0	0	0	#N/A	#N/A	#N/A
ppy-miR-151b	1728	1968	2512	1187	1718	1120	1186	2158	2654	2615	4447	3883	0.169218	0.418068	-0.301398
prd-miR-7911c-3p	0	0	0	0	0	0	0	0	0	0	0	0	#N/A	#N/A	#N/A
rrv-miR-rR1-4-5p	0	1	0	0	0	0	0	0	0	0	0	0	0.738714	0.901481	0.135598
sha-miR-716b	98	46	63	125	82	21	93	52	83	61	87	50	0.0219273	0.106263	0.759546
spu-miR-10	8	7	7	8	8	1	3	26	14	9	9	13	0.133035	0.368404	-0.58578
spu-miR-5993	6	6	9	7	11	4	6	30	11	16	6	9	0.37437	0.671469	-0.366774
ssc-miR-1285	339	184	188	274	135	107	176	381	366	231	295	281	0.84709	0.934209	-0.0410433
ssc-miR-4332	52	3	10	25	0	7	15	0	9	0	3	3	0.0100466	0.059784	1.54839
tae-miR1134	0	0	0	0	0	0	0	0	0	0	0	0	#N/A	#N/A	#N/A
tca-miR-3815-3p	0	0	0	0	0	0	0	0	0	0	0	0	#N/A	#N/A	#N/A
tur-miR-10-5p	6	7	7	0	5	0	1	14	6	3	1	8	0.694084	0.885617	-0.206996

## Sheet: 2.4_Urine
	IR	IR	IR	IR	IR	IR	IR	Sham	Sham	Sham	Sham	Sham
miR	IRRCS_1_urine	IRRCS_2_urine	IRRCS_3_urine	IRRCS_7_urine	IRRCS_10_urine	IRRCS_11_urine	IRRCS_12_urine	IRRCS_4_urine	IRRCS_5_urine	IRRCS_6_urine	IRRCS_8_urine	IRRCS_9_urine	p.values.deseq2	p.values.adjust.BH	log2FoldChange
rno-let-7a-1-3p#rno-let-7c-2-3p	6	0	6	3	4	0	1	6	2	18	5	5	0.431516	0.849842	-0.536704
rno-let-7a-5p	113	136	664	186	119	2	56	371	393	442	184	576	0.273462	0.704242	-0.518608
rno-let-7b-3p	5	1	7	6	3	0	0	4	2	7	1	1	0.322167	0.752836	0.683622
rno-let-7b-5p	153	37	291	170	96	1	27	79	79	143	157	167	0.79831	0.949185	0.136936
rno-let-7c-5p	148	215	856	260	209	3	41	669	553	643	259	1294	0.130485	0.452683	-0.766018
rno-let-7d-3p	28	24	90	25	39	0	6	29	22	57	28	29	0.399917	0.827352	0.425705
rno-let-7d-5p	9	17	127	34	19	0	3	74	79	86	24	123	0.0513852	0.231747	-0.91273
rno-let-7e-3p	0	0	3	0	0	0	0	0	0	0	0	2	0.731143	0.949185	0.397648
rno-let-7e-5p	5	19	105	41	12	0	6	105	113	117	58	119	0.00366817	0.0362914	-1.47615
rno-let-7f-1-3p	2	0	0	1	2	0	0	1	2	0	0	2	0.582188	0.896436	0.571067
rno-let-7f-2-3p	3	1	1	2	0	0	0	1	4	0	1	3	0.954629	0.991056	0.0519279
rno-let-7f-5p	543	609	3063	839	403	202	146	2173	2004	1889	692	2487	0.222058	0.606959	-0.423182
rno-let-7i-3p	0	0	1	0	1	0	0	0	0	2	0	0	0.759947	0.949185	0.366405
rno-let-7i-5p	123	79	482	148	80	1	35	271	274	253	111	1040	0.117837	0.416297	-0.751879
rno-miR-100-5p	0	1	0	1	0	226	2	0	1	1	1	0	0.450318	0.879193	0.806207
rno-miR-101a-3p	92	47	124	179	153	62	27	151	201	115	91	397	0.466738	0.886341	0.346775
rno-miR-101a-5p	30	20	26	59	25	0	15	32	44	24	31	103	0.836579	0.949185	0.109305
rno-miR-101b-3p	8	5	14	23	18	0	4	12	23	10	12	29	0.872273	0.964204	0.0841315
rno-miR-103-3p	48	24	97	49	19	0	17	95	69	72	31	213	0.208201	0.590557	-0.46994
rno-miR-106b-3p	2	2	4	2	0	0	0	5	3	10	3	20	0.0273682	0.152383	-1.44657
rno-miR-106b-5p	0	0	0	1	1	0	0	1	2	2	0	1	0.695363	0.949185	-0.401981
rno-miR-107-3p	34	11	77	29	14	0	9	47	42	34	21	104	0.469738	0.886341	-0.239533
rno-miR-10a-3p	7	1	12	11	5	0	0	8	6	9	2	10	0.570301	0.896436	0.285977
rno-miR-10a-5p	22574	5347	30243	17863	10138	1695	4371	32517	18012	49448	8830	42859	0.296779	0.719609	-0.305999
rno-miR-10b-3p	1	1	1	0	1	0	0	2	2	0	0	1	0.79207	0.949185	0.259318
rno-miR-10b-5p	2	1	2	2	1	1	0	4	3	2	1	7	0.5803	0.896436	-0.380182
rno-miR-122-5p	0	0	0	0	0	0	0	0	0	0	1	0	0.842474	0.949185	0.229775
rno-miR-1249	0	0	2	0	0	0	1	2	4	2	1	0	0.336947	0.758693	-0.956044
rno-miR-125a-3p	0	0	2	2	1	0	0	0	1	0	0	1	0.289762	0.719609	1.14566
rno-miR-125a-5p	131	31	301	84	38	0	11	221	155	217	81	211	0.183039	0.557791	-0.666598
rno-miR-125b-1-3p	0	0	0	0	0	0	0	0	0	0	0	0	#N/A	#N/A	#N/A
rno-miR-125b-2-3p	5	0	13	1	4	0	1	10	11	17	2	13	0.128074	0.447764	-0.907238
rno-miR-125b-5p	3	1	4	2	4	153	4	12	9	9	3	9	0.29573	0.719609	-0.625108
rno-miR-126a-3p	1	1	2	4	0	0	2	3	1	4	0	0	0.428394	0.847393	0.720191
rno-miR-126a-5p	22	12	11	16	18	2	8	15	5	26	8	18	0.0596166	0.25853	0.989003
rno-miR-127-3p	1	1	0	0	0	0	0	0	1	2	0	1	0.908515	0.975927	0.126219
rno-miR-128-1-5p	0	0	0	0	0	0	0	0	1	0	0	1	0.948344	0.990054	0.0749371
rno-miR-128-3p	15	4	41	23	16	0	4	11	17	15	7	18	0.0509552	0.231747	0.750572
rno-miR-129-5p	0	0	0	0	0	0	0	0	0	0	0	0	#N/A	#N/A	#N/A
rno-miR-1306-5p	0	0	0	0	0	0	0	0	0	0	0	0	#N/A	#N/A	#N/A
rno-miR-130a-3p	190	67	510	298	205	0	53	110	93	100	43	151	0.00739915	0.0641734	1.43552
rno-miR-130b-3p	4	2	3	3	3	0	1	3	1	4	1	3	0.214694	0.594031	0.83898
rno-miR-130b-5p	0	0	0	1	0	0	0	0	0	0	0	1	0.704256	0.949185	0.438999
rno-miR-132-3p	0	1	0	0	0	0	0	1	0	1	0	0	0.836427	0.949185	0.247553
rno-miR-133a-3p	1	2	0	0	1	42	0	0	0	0	0	1	0.180987	0.557791	1.56036
rno-miR-133a-5p	0	0	0	0	0	0	0	0	0	0	1	0	0.842474	0.949185	0.229775
rno-miR-133c	0	0	0	0	0	1	0	0	0	0	0	1	0.655407	0.923714	0.532512
rno-miR-134-5p	1	0	0	0	0	0	0	0	0	0	0	0	0.59579	0.896436	0.613197
rno-miR-135a-5p	0	0	0	0	0	0	0	1	0	0	0	0	0.842474	0.949185	0.229775
rno-miR-136-3p	0	0	0	0	2	0	0	0	0	0	0	0	0.506548	0.886341	0.768142
rno-miR-138-5p	0	1	1	1	0	0	2	2	6	3	1	3	0.300695	0.72369	-0.859984
rno-miR-139-5p	0	0	0	0	0	0	0	0	0	0	0	0	#N/A	#N/A	#N/A
rno-miR-1-3p	0	0	0	0	0	0	0	0	0	0	0	0	#N/A	#N/A	#N/A
rno-miR-140-3p	74	21	113	62	40	1	23	49	58	74	27	162	0.421289	0.840715	0.288509
rno-miR-140-5p	2	0	1	0	0	0	1	2	3	1	1	3	0.479251	0.886341	-0.61646
rno-miR-141-3p	22	22	28	110	59	0	19	102	43	295	54	78	0.344878	0.759562	-0.621655
rno-miR-141-5p	3	0	0	1	1	0	1	4	0	9	2	1	0.524464	0.896436	-0.601531
rno-miR-142-3p	0	0	1	1	0	0	0	0	0	0	2	30	0.185835	0.562494	-1.55223
rno-miR-142-5p	2	1	0	4	0	0	0	1	1	1	15	114	0.0166945	0.106045	-2.48624
rno-miR-143-3p	29	41	21	27	20	1834	17	26	37	60	22	106	0.505938	0.886341	0.354367
rno-miR-143-5p	0	0	0	0	0	0	0	0	0	0	0	0	#N/A	#N/A	#N/A
rno-miR-144-3p	0	0	0	2	0	0	0	0	0	0	13	65	0.0834847	0.324583	-2.07417
rno-miR-144-5p	0	0	0	0	0	0	0	0	0	0	7	50	0.134248	0.462183	-1.78563
rno-miR-145-3p	0	0	0	0	0	24	0	0	0	1	0	0	0.842474	0.949185	0.229775
rno-miR-145-5p	0	0	0	0	0	0	6	0	0	0	0	1	0.217635	0.598498	1.44926
rno-miR-146a-5p	3	3	3	3	5	0	0	1	1	4	2	9	0.416644	0.840715	0.583318
rno-miR-146b-5p	10	3	22	9	5	82	3	13	14	22	15	58	0.0456489	0.215808	-0.823875
rno-miR-147	0	0	0	0	3	0	0	0	0	0	0	0	0.416196	0.840715	0.94087
rno-miR-148b-3p	12	5	12	17	9	0	1	34	16	33	6	34	0.141254	0.475416	-0.665782
rno-miR-148b-5p	1	0	2	0	1	0	0	2	1	2	0	3	0.72696	0.949185	-0.318019
rno-miR-150-3p	1	1	0	0	0	0	0	0	0	1	0	0	0.507865	0.886341	0.793481
rno-miR-150-5p	1	2	0	1	1	0	0	1	0	3	0	21	0.559765	0.896436	-0.600057
rno-miR-151-3p	371	66	1036	353	143	1	58	466	283	995	242	1038	0.290307	0.719609	-0.590302
rno-miR-151-5p	23	11	98	50	33	0	11	83	48	90	35	85	0.164973	0.52768	-0.441845
rno-miR-152-3p	2	3	3	2	3	0	0	4	1	9	2	2	0.994197	0.997764	-0.00541047
rno-miR-152-5p	0	0	0	0	0	0	0	0	0	0	0	1	0.817582	0.949185	0.266661
rno-miR-155-5p	0	0	0	0	0	0	0	0	0	0	0	0	#N/A	#N/A	#N/A
rno-miR-15b-3p	1	0	1	0	0	0	0	0	0	0	0	2	0.669861	0.935031	0.510924
rno-miR-15b-5p	10	8	23	23	10	0	4	6	8	14	8	41	0.294212	0.719609	0.486994
rno-miR-16-3p	0	0	0	0	2	0	0	0	0	0	1	3	0.847785	0.949185	0.230039
rno-miR-16-5p	253	24	563	221	90	0	34	165	119	186	181	960	0.566774	0.896436	-0.368591
rno-miR-17-1-3p	0	0	0	0	0	0	0	0	0	0	0	1	0.817582	0.949185	0.266661
rno-miR-17-5p	4	2	3	8	0	0	0	5	0	9	1	10	0.9677	0.994764	-0.0330831
rno-miR-181a-1-3p	1	0	0	2	0	0	1	1	6	3	1	8	0.140597	0.475416	-1.27128
rno-miR-181a-2-3p	1	0	1	0	0	0	0	2	4	5	0	8	0.0489007	0.225043	-1.78346
rno-miR-181a-5p	344	237	1063	400	215	112	116	787	897	777	287	1934	0.230883	0.622793	-0.349638
rno-miR-181b-1-3p	0	0	0	0	0	0	0	0	0	0	0	0	#N/A	#N/A	#N/A
rno-miR-181b-5p	37	28	173	54	32	0	14	70	89	82	33	173	0.495694	0.886341	-0.238364
rno-miR-181c-3p	0	2	2	0	0	0	0	3	3	3	1	12	0.0732631	0.295015	-1.48761
rno-miR-181c-5p	8	6	15	11	15	2	1	28	22	17	14	97	0.0523168	0.233613	-0.924322
rno-miR-181d-5p	0	0	2	1	1	0	0	2	4	2	4	13	0.0223238	0.134241	-1.85721
rno-miR-182	213	78	1102	272	117	17	48	451	279	505	111	532	0.764543	0.949185	-0.0985474
rno-miR-183-3p	0	1	2	0	1	0	0	4	2	5	0	4	0.194734	0.574055	-1.10014
rno-miR-183-5p	44	8	281	97	20	0	25	154	49	299	32	159	0.336928	0.758693	-0.585824
rno-miR-1839-3p	1	1	2	0	1	0	0	0	0	0	0	0	0.0964086	0.368477	1.89669
rno-miR-1839-5p	42	11	38	13	25	0	6	13	13	5	2	22	0.00281859	0.0302663	1.67955
rno-miR-184	61	7	31	14	90	0	5	99	14	42	95	26	0.646992	0.917571	-0.367295
rno-miR-1843-3p	2	1	3	0	3	0	1	1	2	5	1	3	0.784824	0.949185	0.209777
rno-miR-1843-5p	7	1	16	3	1	1	0	4	4	3	4	10	0.624038	0.906273	0.295267
rno-miR-185-5p	0	0	0	1	1	0	0	0	1	0	0	0	0.544086	0.896436	0.72761
rno-miR-186-5p	313	39	521	198	104	0	57	309	220	420	134	501	0.649014	0.917571	-0.258473
rno-miR-187-3p	1	0	0	0	0	0	0	0	0	0	0	0	0.59579	0.896436	0.613197
rno-miR-188-5p	1	1	5	0	1	0	0	0	0	3	0	1	0.337976	0.758693	0.981951
rno-miR-18a-3p	0	0	2	0	1	0	0	0	0	0	0	3	0.693707	0.949185	0.472264
rno-miR-18a-5p	0	0	0	0	0	0	0	0	0	0	0	1	0.817582	0.949185	0.266661
rno-miR-190a-5p	0	1	0	0	0	0	0	0	0	0	0	1	0.704256	0.949185	0.438999
rno-miR-190b-5p	0	0	0	1	0	0	1	0	0	0	1	0	0.492863	0.886341	0.817355
rno-miR-191a-3p	0	0	3	2	0	0	0	3	1	1	0	4	0.704257	0.949185	-0.36012
rno-miR-191a-5p	852	254	2991	1401	305	147	331	2371	1134	4376	695	4477	0.0350531	0.185987	-0.729844
rno-miR-191b	0	0	0	0	0	0	0	0	1	0	0	1	0.948344	0.990054	0.0749371
rno-miR-192-3p	2	0	1	0	0	0	1	4	0	2	1	3	0.580686	0.896436	-0.507151
rno-miR-192-5p	6788	2017	13704	9134	2795	879	1292	8770	6244	10938	2977	15420	0.835566	0.949185	0.0435601
rno-miR-193-3p	5	0	3	8	5	0	1	5	2	3	6	7	0.789834	0.949185	0.183015
rno-miR-194-3p	2	0	6	2	1	0	0	2	2	0	0	2	0.331434	0.758693	0.847498
rno-miR-194-5p	86	34	292	124	64	0	22	157	137	126	83	256	0.47975	0.886341	-0.276191
rno-miR-195-3p	0	0	0	0	0	0	0	0	0	0	0	1	0.817582	0.949185	0.266661
rno-miR-195-5p	0	0	0	0	0	0	0	0	0	1	0	0	0.842474	0.949185	0.229775
rno-miR-196a-3p	0	0	0	0	0	0	0	0	0	1	0	0	0.842474	0.949185	0.229775
rno-miR-196a-5p	0	0	7	1	0	0	0	4	2	6	0	4	0.352562	0.768143	-0.846744
rno-miR-196b-3p	0	0	0	1	0	0	0	0	1	2	1	1	0.62811	0.907941	-0.533572
rno-miR-196b-5p	3	5	20	6	2	0	3	27	30	32	4	42	0.00370156	0.0362914	-1.41899
rno-miR-196c-3p	3	0	0	0	0	0	0	0	1	0	0	0	0.566347	0.896436	0.665195
rno-miR-196c-5p	0	0	0	0	0	0	0	1	0	0	0	0	0.842474	0.949185	0.229775
rno-miR-199a-3p	1	1	3	1	4	0	1	1	1	2	1	5	0.407021	0.834394	0.633771
rno-miR-199a-5p	1	0	0	1	1	0	1	0	0	1	0	0	0.162279	0.52277	1.54012
rno-miR-19a-3p	0	0	4	5	1	0	0	2	2	3	1	7	0.728379	0.949185	-0.271711
rno-miR-19b-3p	17	2	12	17	9	0	10	3	3	7	6	17	0.0237429	0.139502	1.39606
rno-miR-200a-3p	25	25	56	55	44	0	12	80	59	139	37	73	0.339814	0.758693	-0.440611
rno-miR-200a-5p	8	6	4	4	1	0	1	12	9	5	1	9	0.955897	0.991056	0.0376414
rno-miR-200b-3p	21	40	77	23	35	0	7	122	46	235	25	79	0.194746	0.574055	-0.787184
rno-miR-200b-5p	4	0	5	2	1	0	0	5	1	6	1	1	0.93733	0.990054	-0.0628351
rno-miR-200c-3p	0	0	0	2	0	0	0	0	1	5	2	0	0.504666	0.886341	-0.779476
rno-miR-201-3p	0	0	0	0	1	0	0	0	0	0	0	0	0.59579	0.896436	0.613197
rno-miR-201-5p	1	6	0	3	2	0	0	5	1	3	2	7	0.716115	0.949185	0.31674
rno-miR-203a-3p	112	45	232	113	106	0	21	163	108	121	66	239	0.898154	0.973764	0.0565639
rno-miR-203a-5p	2	1	2	5	2	0	2	1	0	0	1	5	0.0789268	0.312246	1.46934
rno-miR-203b-3p	13	5	21	18	9	0	2	18	3	20	10	31	0.858051	0.955508	0.0814821
rno-miR-203b-5p	65	16	86	49	69	0	7	29	23	28	20	72	0.0393639	0.196222	1.01181
rno-miR-204-3p	0	0	0	0	0	0	0	0	0	0	0	0	#N/A	#N/A	#N/A
rno-miR-204-5p	6	6	24	4	2	0	2	18	37	18	6	29	0.0456294	0.215808	-1.08641
rno-miR-205	26	25	29	30	47	0	1	23	12	19	12	30	0.0770088	0.307354	1.08952
rno-miR-208a-3p	0	0	0	1	0	0	0	0	0	0	0	0	0.59579	0.896436	0.613197
rno-miR-208b-3p	0	0	0	0	0	0	0	0	0	0	0	0	#N/A	#N/A	#N/A
rno-miR-20a-5p	1	0	1	2	1	0	1	1	1	0	1	3	0.600762	0.896436	0.461806
rno-miR-20b-5p	0	0	0	0	0	0	0	0	0	0	0	0	#N/A	#N/A	#N/A
rno-miR-210-3p	8	1	14	11	4	0	2	4	2	1	0	11	0.0181351	0.11204	1.48002
rno-miR-211-3p	0	0	0	0	0	0	0	0	0	0	1	0	0.842474	0.949185	0.229775
rno-miR-212-3p	0	0	0	0	0	0	0	0	0	0	0	0	#N/A	#N/A	#N/A
rno-miR-21-3p	6	1	11	19	20	0	5	3	15	13	3	30	0.447484	0.877457	0.498859
rno-miR-214-3p	0	0	0	0	0	0	0	0	0	0	0	0	#N/A	#N/A	#N/A
rno-miR-215	19	39	3	1	14	0	0	5	1	1	0	4	0.00244437	0.028267	3.03244
rno-miR-21-5p	189	196	551	368	345	131	99	551	437	655	213	932	0.555013	0.896436	0.21355
rno-miR-218a-1-3p	2	0	0	1	0	0	0	1	1	1	0	0	0.67173	0.935031	0.476067
rno-miR-218a-5p	1	0	3	2	0	0	1	0	1	1	0	2	0.301671	0.72369	0.966853
rno-miR-218b	0	0	2	1	0	0	0	0	0	0	0	0	0.504199	0.886341	0.772402
rno-miR-219a-1-3p	1	0	0	0	1	0	0	1	0	0	0	0	0.530639	0.896436	0.752044
rno-miR-219a-2-3p	2	1	4	0	0	0	0	1	0	1	1	2	0.502458	0.886341	0.633424
rno-miR-219a-5p	0	0	0	1	0	0	0	0	0	1	0	0	0.739676	0.949185	0.384349
rno-miR-219b	0	0	2	0	0	0	0	0	0	0	0	0	0.574987	0.896436	0.648239
rno-miR-221-3p	29	1	27	16	13	0	2	5	2	17	8	17	0.138455	0.473053	0.938478
rno-miR-221-5p	0	0	1	0	0	0	0	0	0	3	1	0	0.791779	0.949185	-0.316647
rno-miR-222-3p	9	10	26	12	5	0	1	11	4	9	4	11	0.0475796	0.221221	0.939348
rno-miR-223-3p	1	0	0	1	0	0	0	0	0	2	2	14	0.267929	0.695693	-1.2179
rno-miR-223-5p	0	1	0	0	0	0	0	0	0	0	0	0	0.59579	0.896436	0.613197
rno-miR-22-3p	9167	2114	18807	15130	7498	1168	2101	8865	7814	7959	3343	14130	0.00466454	0.0447597	0.669999
rno-miR-224-5p	0	0	0	0	0	0	0	0	0	0	0	0	#N/A	#N/A	#N/A
rno-miR-22-5p	0	0	3	2	1	0	2	1	1	3	0	0	0.366273	0.793874	0.860438
rno-miR-23a-3p	12	3	5	3	1	0	1	2	8	3	5	7	0.712905	0.949185	0.263368
rno-miR-23b-3p	6	4	11	7	4	0	0	38	55	46	24	51	3.91613e-08	2.94363e-06	-2.44898
rno-miR-24-1-5p	0	0	0	0	0	0	0	0	0	0	0	0	#N/A	#N/A	#N/A
rno-miR-24-2-5p	0	0	2	4	2	0	0	5	4	3	1	7	0.268405	0.695693	-0.834581
rno-miR-24-3p	7	2	9	15	5	0	3	8	7	34	7	14	0.49078	0.886341	-0.384833
rno-miR-25-3p	211	38	313	168	166	0	38	108	73	96	81	412	0.339316	0.758693	0.555714
rno-miR-25-5p	0	0	0	1	0	0	0	0	0	0	1	1	0.795774	0.949185	0.310367
rno-miR-26a-3p	0	0	0	0	0	0	0	0	1	1	0	1	0.898195	0.973764	-0.152887
rno-miR-26a-5p	218	101	1027	501	127	9	76	1077	949	1057	477	1324	0.000520375	0.00838176	-1.30993
rno-miR-26b-3p	4	0	11	4	1	0	0	6	2	8	0	5	0.972894	0.994955	0.0241876
rno-miR-26b-5p	42	23	150	64	19	0	2	115	106	130	33	165	0.0670345	0.274841	-0.865278
rno-miR-27a-3p	13	1	9	10	10	1	1	8	4	8	8	16	0.472429	0.886341	0.392285
rno-miR-27a-5p	0	1	1	0	0	0	0	0	0	0	0	0	0.538927	0.896436	0.71271
rno-miR-27b-3p	99	80	302	209	107	24	34	517	483	470	174	735	2.07796e-06	0.000103141	-1.07898
rno-miR-27b-5p	1	0	0	0	0	0	0	2	1	3	1	3	0.169886	0.535794	-1.31044
rno-miR-28-3p	223	94	827	243	134	0	52	367	271	553	147	478	0.657614	0.923937	-0.243044
rno-miR-28-5p	5	5	32	5	3	0	1	16	19	14	6	28	0.198465	0.576466	-0.611577
rno-miR-298-5p	0	0	0	0	0	0	0	1	0	0	0	1	0.948344	0.990054	0.0749371
rno-miR-29a-3p	236	20	182	202	112	1	23	78	68	70	40	70	0.0282869	0.155578	1.23117
rno-miR-29a-5p	0	0	1	0	0	0	0	0	0	2	0	4	0.781693	0.949185	-0.332323
rno-miR-29b-2-5p	0	0	0	0	0	0	0	0	0	0	0	0	#N/A	#N/A	#N/A
rno-miR-29b-3p	0	0	5	4	3	0	0	1	1	2	1	1	0.277949	0.704242	0.935176
rno-miR-29c-3p	14	7	29	33	21	0	3	10	12	16	7	16	0.0170682	0.106913	1.03968
rno-miR-29c-5p	1	0	0	3	2	0	0	0	0	0	1	1	0.191768	0.574055	1.43423
rno-miR-300-3p	0	0	0	1	0	0	0	0	0	0	0	0	0.59579	0.896436	0.613197
rno-miR-301a-3p	1	1	11	5	3	0	6	8	13	13	9	44	0.0722328	0.293487	-1.06765
rno-miR-301b-3p	0	0	0	0	0	0	0	0	0	0	0	0	#N/A	#N/A	#N/A
rno-miR-3065-5p	0	0	0	0	0	0	0	0	0	0	0	0	#N/A	#N/A	#N/A
rno-miR-3068-3p	5	3	22	7	3	0	3	10	13	6	5	14	0.979224	0.996908	-0.012317
rno-miR-3068-5p	0	0	0	0	1	0	0	0	0	0	1	0	0.739676	0.949185	0.384349
rno-miR-3085	0	0	0	0	0	0	0	1	0	0	0	0	0.842474	0.949185	0.229775
rno-miR-30a-3p	66	19	135	56	22	0	7	65	65	78	46	92	0.603951	0.896436	-0.21036
rno-miR-30a-5p	2352	803	4645	2645	1774	332	578	2783	3090	3052	1330	6195	0.703944	0.949185	0.0658828
rno-miR-30b-3p	0	0	0	0	0	0	0	2	1	2	0	4	0.291662	0.719609	-1.17193
rno-miR-30b-5p	22	16	69	67	33	71	3	76	43	127	36	69	0.267089	0.695693	-0.437554
rno-miR-30c-1-3p	2	1	9	2	0	0	0	8	4	14	1	15	0.0543859	0.240471	-1.27146
rno-miR-30c-2-3p	9	3	39	5	8	0	1	28	35	29	5	59	0.0244428	0.13954	-1.10038
rno-miR-30c-5p	129	85	629	206	105	1	44	323	377	430	211	368	0.194116	0.574055	-0.627509
rno-miR-30d-3p	0	0	4	1	1	0	0	3	5	6	4	4	0.038553	0.196222	-1.5831
rno-miR-30d-5p	514	150	987	387	228	364	75	656	522	747	293	857	0.576795	0.896436	-0.123861
rno-miR-30e-3p	29	11	61	34	4	0	5	34	57	50	27	68	0.156175	0.510399	-0.639564
rno-miR-30e-5p	220	119	388	463	288	128	125	419	560	458	297	1037	0.825608	0.949185	0.0875693
rno-miR-3102	0	0	1	0	0	0	0	0	0	2	0	0	0.921094	0.982065	0.114651
rno-miR-3120	0	0	0	0	0	0	0	0	0	0	0	0	#N/A	#N/A	#N/A
rno-miR-31a-5p	4	0	4	5	0	0	0	3	4	9	0	7	0.559755	0.896436	-0.462598
rno-miR-320-3p	109	22	176	89	86	0	21	17	21	47	27	107	0.0101758	0.0771604	1.38942
rno-miR-322-3p	0	1	2	0	0	0	1	4	7	7	2	6	0.00953026	0.0743919	-1.96512
rno-miR-322-5p	2	0	0	2	1	0	0	8	2	3	1	4	0.213174	0.593841	-1.04821
rno-miR-324-3p	3	2	4	1	2	0	0	3	2	1	3	7	0.970071	0.994764	-0.026549
rno-miR-324-5p	2	0	1	0	1	0	0	0	1	1	0	3	0.700476	0.949185	0.397566
rno-miR-32-5p	0	0	0	0	1	0	0	0	1	0	1	1	0.988588	0.997764	-0.0166523
rno-miR-326-3p	13	1	6	4	3	0	0	3	3	3	2	2	0.116058	0.415414	1.14061
rno-miR-328a-3p	47	10	61	19	26	0	6	24	20	27	5	35	0.0423439	0.207577	0.906045
rno-miR-330-3p	0	0	0	1	0	0	0	0	0	1	0	0	0.739676	0.949185	0.384349
rno-miR-330-5p	0	0	1	0	0	0	0	1	0	0	0	2	0.960721	0.993773	0.0588994
rno-miR-331-3p	0	1	2	0	1	0	0	0	2	1	0	1	0.71312	0.949185	0.378141
rno-miR-33-3p	0	0	0	0	2	0	0	0	0	0	0	0	0.506548	0.886341	0.768142
rno-miR-335	0	0	0	0	1	0	0	0	0	0	0	0	0.59579	0.896436	0.613197
rno-miR-33-5p	1	0	0	1	0	0	1	0	0	0	1	0	0.295496	0.719609	1.20042
rno-miR-338-3p	0	0	0	0	0	0	0	0	0	0	0	0	#N/A	#N/A	#N/A
rno-miR-339-3p	6	2	16	4	2	0	0	2	0	3	1	3	0.0133149	0.0883088	1.70923
rno-miR-339-5p	11	0	3	6	6	0	2	6	1	6	6	10	0.622993	0.906273	0.3497
rno-miR-340-3p	0	0	0	0	0	0	0	2	1	0	0	0	0.866225	0.959871	-0.195177
rno-miR-340-5p	0	0	1	1	1	0	0	0	1	0	0	2	0.621104	0.906273	0.545299
rno-miR-341	0	0	0	0	0	0	0	0	0	0	0	0	#N/A	#N/A	#N/A
rno-miR-342-3p	5	0	3	5	0	0	1	8	0	7	0	3	0.939824	0.990054	0.0694983
rno-miR-342-5p	0	0	0	0	0	0	0	1	0	2	1	0	0.708602	0.949185	-0.448261
rno-miR-345-3p	2	1	6	7	3	0	1	2	4	10	4	8	0.749087	0.949185	-0.191928
rno-miR-345-5p	4	1	3	1	1	0	0	2	1	4	5	9	0.386045	0.814238	-0.648738
rno-miR-3473	150	185	149	68	61	0	119	95	41	113	6	113	0.0164222	0.105806	1.84846
rno-miR-34a-5p	1	0	1	5	1	0	0	0	1	4	0	1	0.523414	0.896436	0.633246
rno-miR-34b-5p	0	3	0	0	4	0	1	1	2	0	0	3	0.265891	0.695693	1.20454
rno-miR-34c-5p	12	26	3	20	59	0	9	48	17	27	24	63	0.665217	0.931717	0.322099
rno-miR-350	0	0	0	0	0	0	0	0	0	0	0	0	#N/A	#N/A	#N/A
rno-miR-351-5p	3	5	7	2	1	0	0	25	26	47	18	58	3.32242e-08	2.94363e-06	-2.77935
rno-miR-3543	0	0	0	0	0	0	0	0	0	0	0	2	0.910841	0.975927	0.129506
rno-miR-3553	45	8	262	91	18	0	23	145	46	279	28	152	0.346939	0.759562	-0.568447
rno-miR-3556a	0	0	0	1	2	0	0	0	0	0	0	0	0.425426	0.84523	0.924997
rno-miR-3556b	51	6	73	87	39	0	8	23	13	22	8	22	0.000998793	0.0132487	1.6383
rno-miR-3557-3p	14	2	9	6	10	0	1	5	3	5	5	8	0.100528	0.374697	0.975969
rno-miR-3557-5p	1727	564	4943	2412	1403	230	452	1381	1138	1223	725	2396	1.87388e-09	2.1128e-07	0.958125
rno-miR-3559-3p	0	0	2	0	0	0	0	0	0	1	0	1	0.787996	0.949185	0.321508
rno-miR-3559-5p	0	0	2	0	0	0	0	0	1	0	4	4	0.317975	0.746909	-1.15139
rno-miR-3560	1	0	0	1	0	0	1	1	0	3	0	2	0.986796	0.997764	0.0167938
rno-miR-3570	1	0	0	2	0	0	1	1	3	2	1	8	0.286427	0.719609	-0.924433
rno-miR-3571	0	0	0	0	0	0	0	0	0	0	0	0	#N/A	#N/A	#N/A
rno-miR-3574	8	1	14	10	5	0	2	4	2	1	0	9	0.00759838	0.0646579	1.6244
rno-miR-3577	0	0	1	0	0	0	0	1	1	1	0	0	0.903557	0.974891	-0.142884
rno-miR-3585-3p	0	1	0	0	0	0	0	0	0	1	0	1	0.778412	0.949185	0.337343
rno-miR-3585-5p	1	3	1	5	4	0	0	8	1	1	0	7	0.604249	0.896436	0.445834
rno-miR-3586-3p	13	11	97	43	23	0	8	84	45	93	32	84	0.0447461	0.215808	-0.707407
rno-miR-3587	1	0	7	9	3	0	0	1	1	4	1	1	0.149739	0.492936	1.17855
rno-miR-3588	2	0	3	2	3	0	0	11	8	7	3	7	0.0258546	0.145755	-1.44402
rno-miR-3589	4	0	4	2	3	0	0	4	2	2	2	1	0.633422	0.909788	0.364372
rno-miR-3590-3p	0	0	0	0	0	0	0	0	0	0	0	0	#N/A	#N/A	#N/A
rno-miR-3590-5p	145	45	445	213	155	0	35	53	55	46	25	91	0.000280166	0.0054937	1.87407
rno-miR-3596a	720	871	4189	1164	654	199	199	2929	2678	2687	1021	4021	0.0999318	0.374697	-0.520811
rno-miR-3596b	7	15	125	33	20	0	3	68	76	82	23	116	0.0635231	0.265268	-0.897994
rno-miR-3596c	3	10	52	19	5	0	1	37	52	50	25	56	0.00947152	0.0743919	-1.33443
rno-miR-3596d	17	7	50	13	8	0	7	16	22	27	10	33	0.742787	0.949185	0.120921
rno-miR-361-3p	5	0	3	1	0	0	0	1	0	1	0	2	0.22505	0.611432	1.2309
rno-miR-361-5p	1	0	3	4	0	0	0	1	2	2	0	1	0.601373	0.896436	0.482828
rno-miR-362-3p	0	1	2	0	0	0	0	0	0	0	1	0	0.483782	0.886341	0.834853
rno-miR-362-5p	0	0	0	0	0	0	0	1	0	0	0	0	0.842474	0.949185	0.229775
rno-miR-363-3p	1	0	0	0	0	0	0	0	0	0	0	2	0.788071	0.949185	0.310999
rno-miR-365-3p	2	1	2	1	1	0	0	0	0	0	2	1	0.197774	0.576466	1.24068
rno-miR-365-5p	1	0	1	1	0	0	1	1	0	1	0	1	0.419544	0.840715	0.803979
rno-miR-374-3p	0	0	0	2	1	0	0	2	1	0	0	1	0.798646	0.949185	0.282795
rno-miR-374-5p	4	0	0	0	1	0	0	1	1	2	1	4	0.970501	0.994764	-0.0364081
rno-miR-375-3p	25	11	40	8	20	0	2	14	8	8	4	12	0.00666553	0.0589442	1.41969
rno-miR-378a-3p	2685	816	7184	3391	1855	235	699	2130	1704	1895	1015	3374	9.51502e-06	0.000286085	0.881196
rno-miR-378a-5p	14	3	11	5	10	0	1	5	4	7	6	8	0.157721	0.511743	0.812745
rno-miR-378b	1	0	3	1	1	0	0	0	0	2	0	1	0.314251	0.743499	1.02467
rno-miR-379-5p	0	0	0	0	0	0	0	0	0	0	0	0	#N/A	#N/A	#N/A
rno-miR-381-3p	0	0	1	0	1	24	0	0	0	0	0	1	0.569522	0.896436	0.681452
rno-miR-382-3p	0	0	0	0	0	0	0	0	0	0	0	0	#N/A	#N/A	#N/A
rno-miR-382-5p	0	0	0	0	0	0	0	0	0	0	0	0	#N/A	#N/A	#N/A
rno-miR-383-5p	0	0	0	0	0	0	0	0	0	0	0	1	0.817582	0.949185	0.266661
rno-miR-409a-3p	0	0	1	0	0	0	0	0	0	0	0	0	0.624947	0.906273	0.565012
rno-miR-409b	0	0	1	0	0	0	0	0	0	0	0	0	0.624947	0.906273	0.565012
rno-miR-410-3p	0	0	1	0	0	0	0	1	0	0	0	0	0.778262	0.949185	0.32566
rno-miR-411-5p	0	0	0	0	1	0	0	0	0	1	0	0	0.739676	0.949185	0.384349
rno-miR-421-3p	3	2	10	2	3	0	1	1	2	7	1	4	0.276961	0.704242	0.71133
rno-miR-423-3p	56	17	108	60	41	0	7	17	26	31	13	30	0.00110626	0.014255	1.35149
rno-miR-423-5p	111	23	334	142	95	0	23	31	52	56	63	51	0.0656648	0.271696	1.09157
rno-miR-425-3p	0	0	0	0	0	0	0	0	2	1	1	0	0.642147	0.917571	-0.557365
rno-miR-425-5p	19	4	44	9	14	0	2	15	5	12	5	28	0.113136	0.408193	0.728595
rno-miR-429	49	30	113	58	28	0	13	147	50	250	34	110	0.149586	0.492936	-0.701535
rno-miR-434-3p	0	0	0	0	0	0	0	0	0	0	0	1	0.817582	0.949185	0.266661
rno-miR-449a-5p	2	8	1	1	1	0	0	8	1	6	2	7	0.880406	0.968446	0.130607
rno-miR-450a-5p	0	0	0	0	0	0	0	1	1	2	0	1	0.57582	0.896436	-0.649812
rno-miR-451-5p	0	4	0	5	0	0	0	1	0	2	66	436	0.0121314	0.0841732	-2.90371
rno-miR-455-3p	2	0	2	1	2	0	0	2	0	0	3	0	0.784443	0.949185	0.28445
rno-miR-455-5p	1	1	1	1	0	0	0	0	0	3	0	1	0.610284	0.90242	0.5309
rno-miR-466b-2-3p	0	0	0	0	0	0	0	0	0	0	0	1	0.817582	0.949185	0.266661
rno-miR-466c-5p	0	0	0	0	0	0	0	0	0	0	0	0	#N/A	#N/A	#N/A
rno-miR-484	1	0	5	1	1	0	0	1	0	5	1	3	0.90068	0.974116	-0.10819
rno-miR-488-3p	0	1	0	0	0	0	0	0	0	0	0	0	0.59579	0.896436	0.613197
rno-miR-489-3p	0	0	0	0	0	0	0	0	0	0	0	1	0.817582	0.949185	0.266661
rno-miR-490-3p	0	0	0	0	1	0	0	0	0	0	0	0	0.59579	0.896436	0.613197
rno-miR-494-3p	1	0	0	0	1	0	0	0	0	1	0	0	0.531643	0.896436	0.75019
rno-miR-496-3p	0	0	0	0	0	0	0	0	0	0	0	0	#N/A	#N/A	#N/A
rno-miR-497-5p	0	1	0	0	2	0	0	1	0	0	1	0	0.462014	0.886341	0.853834
rno-miR-499-3p	1	0	1	2	0	0	0	0	0	2	0	3	0.747537	0.949185	0.347312
rno-miR-499-5p	1	0	2	1	1	0	0	1	1	5	0	8	0.372078	0.799082	-0.774117
rno-miR-500-3p	0	0	0	0	0	0	0	0	0	0	2	2	0.798502	0.949185	-0.296734
rno-miR-501-3p	1	0	0	1	1	0	1	1	0	4	0	2	0.914064	0.976879	0.105066
rno-miR-503-3p	0	0	1	0	0	1	0	1	1	3	1	0	0.545804	0.896436	-0.612904
rno-miR-504	3	3	19	2	3	0	1	10	13	14	9	12	0.104128	0.381802	-0.872349
rno-miR-505-3p	5	0	8	4	2	0	0	4	3	4	5	0	0.975347	0.995207	-0.0250284
rno-miR-532-3p	0	0	0	0	0	0	0	0	0	0	0	0	#N/A	#N/A	#N/A
rno-miR-532-5p	4	2	6	1	4	0	0	1	3	2	2	5	0.34162	0.758968	0.664971
rno-miR-541-5p	1	0	4	1	1	0	1	2	2	1	1	3	0.895246	0.973764	0.102877
rno-miR-542-3p	0	0	0	0	0	0	0	3	1	0	0	2	0.598034	0.896436	-0.63181
rno-miR-542-5p	0	0	0	0	0	0	0	0	0	0	0	0	#N/A	#N/A	#N/A
rno-miR-547-5p	0	0	0	0	0	0	0	0	0	0	0	0	#N/A	#N/A	#N/A
rno-miR-582-3p	0	1	2	0	0	0	0	2	0	1	0	1	0.87948	0.968446	0.163133
rno-miR-582-5p	1	0	0	0	0	0	0	0	0	0	0	0	0.59579	0.896436	0.613197
rno-miR-598-3p	1	1	3	1	0	0	2	1	1	2	0	0	0.206482	0.58939	1.1691
rno-miR-615	0	0	1	0	0	0	0	0	0	2	1	1	0.78532	0.949185	-0.316852
rno-miR-6215	0	0	0	0	0	0	0	0	0	0	0	0	#N/A	#N/A	#N/A
rno-miR-6315	0	0	0	0	0	0	0	0	1	0	0	0	0.842474	0.949185	0.229775
rno-miR-6328	0	0	0	0	0	0	0	0	0	0	0	0	#N/A	#N/A	#N/A
rno-miR-6329	3	0	3	2	0	0	0	2	1	3	2	0	0.987661	0.997764	0.0141767
rno-miR-652-3p	5	0	5	1	4	0	0	3	8	10	0	16	0.345702	0.759562	-0.730362
rno-miR-653-5p	1	0	0	0	0	0	0	1	0	1	0	0	0.84923	0.949185	0.227588
rno-miR-664-2-5p	2	1	2	0	0	0	0	1	0	2	2	1	0.953648	0.991056	0.0555791
rno-miR-664-3p	1	0	3	1	0	0	1	0	0	1	2	0	0.419469	0.840715	0.815205
rno-miR-667-3p	0	0	0	0	0	0	0	0	0	0	0	0	#N/A	#N/A	#N/A
rno-miR-671	2	0	2	0	1	0	0	3	7	4	1	7	0.0609051	0.260954	-1.47547
rno-miR-672-3p	0	0	0	0	0	0	0	0	0	0	0	0	#N/A	#N/A	#N/A
rno-miR-672-5p	3	3	6	3	2	0	1	9	3	2	1	5	0.712661	0.949185	0.23504
rno-miR-674-3p	0	0	3	0	0	0	0	0	0	0	0	3	0.815201	0.949185	0.270713
rno-miR-674-5p	0	0	0	0	0	0	0	0	0	0	0	0	#N/A	#N/A	#N/A
rno-miR-702-3p	2	0	0	0	0	0	0	0	0	0	1	1	0.645541	0.917571	0.551562
rno-miR-708-3p	1	0	0	0	1	0	0	3	5	0	0	1	0.499994	0.886341	-0.747957
rno-miR-708-5p	1	0	0	0	0	0	0	1	2	0	0	2	0.764952	0.949185	-0.346332
rno-miR-743b-3p	6	6	0	3	11	0	0	10	2	6	1	6	0.367893	0.793874	0.778167
rno-miR-760-3p	0	0	1	0	0	0	0	1	0	0	0	1	0.8662	0.959871	0.200432
rno-miR-7a-1-3p	0	0	1	0	1	0	1	1	0	2	0	2	0.897138	0.973764	0.129617
rno-miR-7a-5p	0	0	0	0	0	0	0	0	0	0	0	0	#N/A	#N/A	#N/A
rno-miR-802-3p	1	0	0	0	0	0	0	0	0	0	0	0	0.59579	0.896436	0.613197
rno-miR-802-5p	2	0	0	0	0	0	0	0	0	0	0	0	0.506548	0.886341	0.768142
rno-miR-872-3p	14	4	28	14	6	75	1	17	6	6	2	16	0.0859423	0.331282	0.785013
rno-miR-872-5p	4	5	25	18	5	0	5	17	22	19	11	38	0.213309	0.593841	-0.505616
rno-miR-874-3p	1	1	4	1	1	0	0	5	0	3	0	2	0.966815	0.994764	0.035848
rno-miR-874-5p	0	0	2	0	1	0	1	4	2	3	0	2	0.391773	0.814238	-0.754358
rno-miR-877	2	2	7	2	4	0	1	0	0	1	1	1	0.00305411	0.0320327	2.48055
rno-miR-879-5p	0	0	0	0	0	0	0	0	0	0	0	0	#N/A	#N/A	#N/A
rno-miR-92a-1-5p	0	1	0	2	0	0	0	2	2	1	1	0	0.764137	0.949185	-0.310789
rno-miR-92a-3p	109	35	244	57	55	1	10	36	69	64	48	185	0.412292	0.840715	0.399027
rno-miR-92b-3p	0	0	0	0	2	28	0	0	0	0	0	0	0.506548	0.886341	0.768142
rno-miR-93-3p	0	0	1	1	1	0	0	1	0	1	0	0	0.510792	0.886341	0.733984
rno-miR-93-5p	32	12	42	14	11	0	11	55	27	39	21	122	0.231994	0.622793	-0.525202
rno-miR-96-5p	0	0	5	0	0	0	0	3	0	1	0	2	0.942108	0.990054	-0.0834142
rno-miR-98-3p	0	0	1	2	1	0	0	3	2	3	3	2	0.179799	0.557791	-1.12667
rno-miR-98-5p	11	5	45	7	7	0	2	16	23	25	10	60	0.147901	0.492936	-0.616364
rno-miR-99a-3p	0	0	0	1	0	0	0	0	0	0	0	0	0.59579	0.896436	0.613197
rno-miR-99a-5p	7	1	2	8	1	1	0	13	4	21	0	18	0.332087	0.758693	-0.7296
rno-miR-99b-3p	4	0	2	6	4	0	1	1	1	3	2	4	0.199399	0.576466	0.955497
rno-miR-99b-5p	366	47	497	359	175	1	73	367	211	943	137	581	0.589143	0.896436	-0.314222
rno-miR-9a-5p	2	1	0	1	1	0	0	0	2	0	0	1	0.332688	0.758693	1.02249
rno-miR-9b-3p	1	0	0	0	1	0	0	0	0	0	0	0	0.506548	0.886341	0.768142
aca-miR-10c-5p	0	0	0	0	0	0	0	2	0	0	0	0	0.997764	0.997764	-0.00324297
aca-miR-5450	0	0	0	0	0	0	0	0	0	0	0	0	#N/A	#N/A	#N/A
aga-miR-1175#aae-miR-1175-3p	0	0	0	0	0	0	0	0	0	0	0	0	#N/A	#N/A	#N/A
ame-miR-3776	79	71	58	4	48	0	1	14	6	3	4	9	0.000631474	0.00949316	2.88755
ame-miR-3782	0	0	0	0	0	0	0	0	0	0	0	0	#N/A	#N/A	#N/A
ath-miR5021	4	0	6	1	0	0	1	0	0	0	1	0	0.0302596	0.162465	2.29656
ath-miR5658	0	3	0	1	2	0	9	0	0	0	2	0	0.0613329	0.260954	2.15189
ath-miR833a-3p#aly-miR833-3p	0	0	0	0	0	0	0	0	0	0	0	0	#N/A	#N/A	#N/A
bfl-miR-10a-3p#bbe-miR-10a-3p	0	0	0	0	0	0	0	0	1	1	0	0	0.995566	0.997764	0.00642922
blv-miR-B3-3p	0	0	0	0	0	0	0	0	0	0	0	0	#N/A	#N/A	#N/A
bmo-miR-2779	3	3	0	0	8	0	0	3	11	12	0	11	0.710831	0.949185	-0.367659
bmo-miR-2840	0	0	0	0	0	0	0	0	0	0	0	0	#N/A	#N/A	#N/A
bta-miR-1434-5p	0	0	0	2	0	0	0	0	0	0	0	0	0.506548	0.886341	0.768142
bta-miR-1940	2	0	16	4	0	0	1	0	0	1	0	0	0.00882795	0.0723892	2.73244
bta-miR-2340	1117	9735	6715	1371	1263	1180	473	46328	33126	82480	3112	45130	0.0106379	0.0773821	-1.90824
bta-miR-2478	6	19	17	4	12	0	1	291	578	363	25	427	2.21149e-07	1.42483e-05	-3.73699
bta-miR-2487	701	183	778	164	140	115	84	37	27	21	9	17	9.05689e-19	4.08466e-16	4.51035
bta-miR-26c	213	96	993	492	127	9	84	1050	899	1032	465	1246	0.000786525	0.0110851	-1.26485
bta-miR-2887	212	91	361	110	72	0	39	24	7	29	32	2	0.000726974	0.0105763	2.62081
bta-miR-2889	5334	309	1216	369	397	0	139	81	17	80	45	8	7.78908e-05	0.00175644	3.06572
bta-miR-2898	13	29	25	10	19	0	3	292	465	591	81	274	4.90061e-07	2.76272e-05	-3.21585
bta-miR-2904	46	19	156	48	32	0	9	19	19	29	283	12	#N/A	#N/A	-1.04191
bta-miR-2957	2	2	0	5	5	0	0	0	0	3	1	0	0.112502	0.408193	1.65186
bta-miR-3596	96	27	161	101	67	0	12	44	46	82	109	131	0.943939	0.990054	0.0406819
bta-miR-3600	9087	2060	18621	15021	7423	1156	2064	8728	7705	7789	3288	13925	0.0048451	0.0455237	0.676333
bta-miR-3601	0	0	0	0	0	0	0	0	0	0	0	0	#N/A	#N/A	#N/A
bta-miR-3604#ipu-miR-199b	1	1	1	0	4	3	0	0	1	0	0	4	0.0806593	0.316325	1.82543
bta-miR-669	0	0	2	0	0	0	0	2	1	5	1	1	0.205539	0.58939	-1.24887
cgr-miR-1260	2	7	5	1	5	0	0	46	119	55	6	66	0.000157397	0.00322664	-2.85876
cgr-miR-1285	20	7	40	12	3	0	7	44	40	163	10	83	0.00956703	0.0743919	-1.46476
cgr-miR-1973	0	0	0	0	0	0	0	0	0	0	0	0	#N/A	#N/A	#N/A
cin-miR-3575-5p	1	0	3	0	5	0	0	2	0	3	0	3	0.529445	0.896436	0.628324
cin-miR-4171-5p	8	0	11	3	0	0	2	0	0	0	0	1	0.00259877	0.0293011	3.14367
cpa-miR8154	0	0	0	0	0	0	0	0	0	0	0	0	#N/A	#N/A	#N/A
crm-miR-7594	0	0	0	0	0	0	0	0	0	0	0	0	#N/A	#N/A	#N/A
dme-miR-10-3p#bmo-miR-10-3p#tca-miR-10-3p#cqu-miR-10-3p#mse-miR-10a	331	167	437	260	223	0	38	361	225	403	99	498	0.718937	0.949185	0.218101
dme-miR-4949-5p	0	0	0	0	0	0	0	0	0	0	0	0	#N/A	#N/A	#N/A
dps-miR-1002-3p	0	0	3	0	1	0	0	0	0	0	0	0	0.469007	0.886341	0.837617
dre-miR-125a#fru-miR-125a#tni-miR-125a#xtr-miR-125a#aca-miR-125a-5p#ola-miR-125a-5p#ipu-miR-125a	0	0	0	0	0	0	0	1	0	0	1	0	0.995804	0.997764	-0.00608576
eca-miR-1271	0	0	0	0	0	0	0	0	0	0	0	0	#N/A	#N/A	#N/A
gga-miR-1692	5	21	10	30	36	0	19	6	6	18	32	5	0.239648	0.639534	0.978535
gga-miR-1731-3p	0	0	0	0	0	0	0	0	0	0	0	0	#N/A	#N/A	#N/A
gga-miR-1766	1	0	1	2	1	7	0	0	0	1	0	3	0.0187342	0.114177	2.57884
gga-miR-365b-5p	2	1	0	0	0	0	0	0	0	0	0	0	0.387415	0.814238	1.01367
gga-miR-6651-5p	0	0	0	0	0	0	1	1	1	0	0	0	0.848018	0.949185	0.229026
gma-miR4387b	0	0	0	0	0	0	0	0	0	0	0	0	#N/A	#N/A	#N/A
hbr-miR482	0	0	0	0	0	0	0	0	0	0	0	0	#N/A	#N/A	#N/A
hcmv-miR-US25-1-3p	0	0	1	0	0	0	0	0	0	0	1	0	0.778262	0.949185	0.32566
hco-miR-5978	0	1	5	3	1	0	0	5	1	7	1	6	0.376636	0.803972	-0.645776
hhi-miR-7641	141	52	1132	218	152	0	98	291	67	113	30	140	0.0574549	0.251574	1.2678
hhv6b-miR-Ro6-1-3p	4	0	24	3	3	0	6	3	0	1	0	0	0.00275362	0.0302663	2.80295
hsa-miR-103b	384	86	469	477	356	0	85	154	125	112	61	315	0.0163715	0.105806	1.48917
hsa-miR-1248#ptr-miR-1248#bta-miR-1248#ppy-miR-1248	0	0	0	0	0	0	0	0	0	0	0	0	#N/A	#N/A	#N/A
hsa-miR-1271-3p	0	0	0	0	0	0	0	0	0	0	0	0	#N/A	#N/A	#N/A
hsa-miR-1273g-3p	15	7	57	13	5	0	8	68	136	288	4	84	0.00201719	0.0252709	-2.08657
hsa-miR-1303#ptr-miR-1303	26	16	72	22	10	0	8	89	136	300	14	117	0.00216148	0.0259687	-1.72786
hsa-miR-148a-3p#mmu-miR-148a-3p#gga-miR-148a-3p#ssc-miR-148a-3p#bta-miR-148a#xtr-miR-148a#oan-miR-148-3p#mml-miR-148a-3p#cfa-miR-148a#ptr-miR-148a#mdo-miR-148-3p#eca-miR-148a#tgu-miR-148-3p#ppy-miR-148a#aca-miR-148a-3p#oar-miR-148a	86	167	119	132	182	297	38	375	150	959	118	261	0.339495	0.758693	0.727005
hsa-miR-148a-5p#mmu-miR-148a-5p#ssc-miR-148a-5p#mml-miR-148a-5p	5	6	4	1	4	0	1	1	6	9	4	13	0.940404	0.990054	0.0529579
hsa-miR-1973	0	0	0	0	0	0	0	0	0	0	0	0	#N/A	#N/A	#N/A
hsa-miR-3168	66	57	105	534	642	0	97	34	32	329	1836	776	0.314874	0.743499	-0.972993
hsa-miR-3184-3p	105	18	296	128	88	1	20	24	36	47	55	44	0.0240746	0.139502	1.25269
hsa-miR-3184-5p	32	4	17	39	42	0	4	1	2	4	4	3	1.47029e-05	0.000414437	3.11034
hsa-miR-3195	55	12	56	6	16	0	4	54	36	62	1	4	0.892839	0.973764	0.106728
hsa-miR-3529-3p	0	0	0	0	0	0	0	0	0	0	0	0	#N/A	#N/A	#N/A
hsa-miR-3607-5p	0	0	0	0	0	0	0	0	0	0	0	0	#N/A	#N/A	#N/A
hsa-miR-3692-3p	0	0	0	0	0	0	0	0	0	0	0	0	#N/A	#N/A	#N/A
hsa-miR-378g	1	0	3	1	0	0	0	0	0	0	0	1	0.255122	0.676823	1.31448
hsa-miR-4286#bta-miR-4286	0	1	1	0	1	0	0	5	3	11	0	5	0.0381905	0.196222	-1.80189
hsa-miR-4301	0	0	17	0	1	0	1	8	5	10	1	4	0.388181	0.814238	-0.747792
hsa-miR-4448	79	8	9	5	3	0	0	69	150	108	4	165	0.0974003	0.369139	-1.48055
hsa-miR-4454	5	4	1	5	14	0	0	86	111	172	10	110	6.51089e-05	0.00154548	-2.9859
hsa-miR-4485	0	0	0	0	0	0	0	0	2	2	0	2	0.576226	0.896436	-0.668954
hsa-miR-4492	119	20	133	28	23	0	11	9	3	6	7	3	3.06225e-06	0.000125552	3.1458
hsa-miR-4497	19	12	6	8	20	0	0	6	0	8	2	0	0.0294933	0.160259	2.03178
hsa-miR-4502	0	0	0	0	0	0	0	0	0	0	0	0	#N/A	#N/A	#N/A
hsa-miR-4508	35	1	24	7	6	0	0	4	0	6	0	1	0.0104363	0.0771604	2.35201
hsa-miR-4523	0	0	0	0	1	0	0	0	0	0	1	2	0.911009	0.975927	0.133987
hsa-miR-4532	86	8	6	11	4	0	0	8	2	11	4	1	0.0371024	0.194572	1.91758
hsa-miR-4792	3308	825	2204	1515	1841	0	75	353	60	133	104	366	0.000155119	0.00322664	3.08424
hsa-miR-486-3p#mmu-miR-486-3p#mml-miR-486-3p#eca-miR-486-3p	2	1	1	0	0	0	1	0	3	2	2	9	0.390131	0.814238	-0.754973
hsa-miR-486-5p#mmu-miR-486-5p#mml-miR-486-5p#ptr-miR-486#bta-miR-486#eca-miR-486-5p#ssc-miR-486#mmu-miR-3107-5p#ppy-miR-486-5p#cgr-miR-486-5p#ggo-miR-486	163	314	112	470	213	521	121	134	128	347	2493	18640	0.183045	0.557791	-1.22195
hsa-miR-5585-3p	2	0	15	3	5	0	0	4	5	2	1	6	0.510973	0.886341	0.447978
hsa-miR-574-3p#mmu-miR-574-3p#cfa-miR-574#ssc-miR-574#ggo-miR-574	0	0	2	0	0	0	1	2	1	7	1	2	0.169404	0.535794	-1.25424
hsa-miR-589-5p#mml-miR-589#ppy-miR-589	20	12	8	7	9	1	0	1	1	1	0	1	5.45298e-06	0.000204941	3.79802
hsa-miR-619-5p	0	0	0	0	0	0	0	2	0	1	0	0	0.894489	0.973764	-0.153625
hsa-miR-6797-5p	0	0	0	0	0	0	0	0	0	0	0	0	#N/A	#N/A	#N/A
hsa-miR-718#ptr-miR-718	67	13	38	4	2	0	4	7	0	2	1	1	0.000347601	0.00602954	3.16257
hsa-miR-7641	43	5	354	63	27	0	63	21	12	67	3	15	0.00785543	0.0656074	2.05752
hsa-miR-7704	31	11	72	20	4	0	7	15	2	13	4	2	0.00516324	0.0475229	1.84346
hsa-miR-7847-3p	5	0	1	3	2	0	2	0	0	0	1	1	0.0103235	0.0771604	2.50225
hsa-miR-7977	0	1	1	0	2	0	0	46	73	99	11	59	1.20381e-11	2.71459e-09	-4.9074
hsv1-miR-H17	64	35	44	27	13	0	6	18	4	9	22	6	0.0392204	0.196222	1.51959
ipu-miR-16c	0	0	0	0	0	0	0	0	0	0	0	0	#N/A	#N/A	#N/A
mdo-miR-7341-5p	0	0	0	0	0	0	0	0	0	0	1	0	0.842474	0.949185	0.229775
mdo-miR-7371c-5p	0	0	0	0	0	0	0	0	0	0	0	0	#N/A	#N/A	#N/A
mml-miR-7164-5p	0	0	0	0	0	0	0	0	0	0	0	0	#N/A	#N/A	#N/A
mmu-let-7g-5p#hsa-let-7g-5p#bta-let-7g#oan-let-7g-5p#mml-let-7g-5p#cfa-let-7g#ptr-let-7g#eca-let-7g#ssc-let-7g#tgu-let-7g-5p#ppy-let-7g#aca-let-7g#cgr-let-7g-5p	0	0	3	3	1	0	0	2	2	5	1	5	0.37792	0.803972	-0.688408
mmu-miR-1187	0	0	1	0	0	0	0	0	0	0	0	1	0.744994	0.949185	0.37611
mmu-miR-1195	12	14	26	0	2	0	3	21	13	25	2	25	0.995946	0.997764	0.0038568
mmu-miR-1247-5p#hsa-miR-1247-5p#ptr-miR-1247#ppy-miR-1247#mml-miR-1247-5p	0	0	0	0	0	0	0	0	0	0	0	0	#N/A	#N/A	#N/A
mmu-miR-142b	0	0	0	0	0	0	0	0	0	0	0	9	0.702225	0.949185	-0.443786
mmu-miR-149-5p#hsa-miR-149-5p#mml-miR-149-5p#ptr-miR-149#cfa-miR-149#eca-miR-149#ppy-miR-149#ssc-miR-149#ggo-miR-149#bta-miR-149-5p	1	0	0	0	0	0	0	4	8	5	1	3	0.012506	0.0854575	-2.30038
mmu-miR-16-1-3p#oan-miR-16a-3p	0	0	0	2	0	0	0	0	0	0	0	0	0.506548	0.886341	0.768142
mmu-miR-1895	1	0	2	1	4	0	0	0	0	1	2	0	0.27531	0.704242	1.13122
mmu-miR-1940	0	0	0	1	0	0	0	0	0	0	1	0	0.739676	0.949185	0.384349
mmu-miR-1957a	10	1	3	2	1	0	0	22	63	9	0	91	0.00649821	0.0586138	-2.42629
mmu-miR-1983	0	0	0	0	1	0	0	0	0	1	1	0	0.850268	0.949185	0.226398
mmu-miR-2137	575	59	248	53	73	0	17	25	7	25	9	4	2.56737e-05	0.00064327	3.41009
mmu-miR-30f	2	2	3	3	3	0	0	1	3	2	1	5	0.463305	0.886341	0.520619
mmu-miR-3470a	0	1	0	0	1	0	0	0	1	0	0	0	0.498297	0.886341	0.81053
mmu-miR-3470b	11	13	2	0	6	0	1	7	1	2	0	3	0.0395924	0.196222	1.93377
mmu-miR-3472	2	7	1	0	1	0	1	0	1	0	0	0	0.0119666	0.0841732	2.75273
mmu-miR-3473a	6	2	1	2	4	0	0	1	1	1	0	3	0.0459369	0.215808	1.73605
mmu-miR-3473b	10	15	2	1	5	0	3	2	2	0	0	3	0.00218805	0.0259687	2.8307
mmu-miR-3535	69	0	18	26	4	0	2	0	0	1	0	0	1.69849e-05	0.0004506	4.51859
mmu-miR-3963	0	0	2	0	0	0	0	3	16	5	0	8	0.0116479	0.0833844	-2.52918
mmu-miR-3968	1	1	0	1	0	0	0	20	64	20	1	43	6.68081e-06	0.000231773	-3.93434
mmu-miR-466i-5p	6	4	1	6	3	0	2	1	0	0	0	1	0.000382261	0.00638518	3.29643
mmu-miR-5099	0	0	1	0	0	0	1	0	0	0	1	0	0.532654	0.896436	0.741702
mmu-miR-5100	3	2	2	0	4	0	0	7	10	22	1	7	0.10356	0.381802	-1.2848
mmu-miR-5106	2	2	1	140	29	0	86	1	0	1	127	0	0.64695	0.917571	0.532599
mmu-miR-5119	5	17	14	62	52	0	10	2	1	95	25	0	0.580083	0.896436	0.54532
mmu-miR-5126	64	1	9	5	5	0	0	1	0	1	4	0	0.210022	0.591998	1.14703
mmu-miR-6236	2	3	11	2	5	0	3	2	1	2	4	3	0.062489	0.263388	1.2676
mmu-miR-6238	9	0	33	3	3	11	10	0	0	1	0	0	2.28695e-06	0.000103141	4.77953
mmu-miR-6239	57	9	174	35	36	0	13	14	4	18	5	6	8.67074e-06	0.000279322	2.52534
mmu-miR-6240	281	66	1015	268	101	0	85	71	31	141	13	79	0.000583275	0.00907094	2.24178
mmu-miR-6343	0	0	0	0	0	0	0	0	0	0	0	1	0.817582	0.949185	0.266661
mmu-miR-6412	1	3	2	1	1	0	0	1	8	10	3	7	0.118151	0.416297	-1.20003
mmu-miR-682	0	0	1	0	0	0	0	0	0	0	0	0	0.624947	0.906273	0.565012
mmu-miR-690	5	4	5	1	3	0	2	6	1	12	1	5	0.633013	0.909788	0.336333
mmu-miR-6937-5p	33	3	137	14	8	0	11	4	6	0	4	3	0.000295184	0.00554701	2.74335
mmu-miR-6971-3p	0	0	0	0	0	0	0	0	0	0	0	0	#N/A	#N/A	#N/A
mmu-miR-709	18	26	20	8	7	0	5	5	3	6	2	13	0.000986065	0.0132487	2.19085
mmu-miR-7225-5p	0	0	0	0	0	0	0	0	0	0	0	0	#N/A	#N/A	#N/A
mmu-miR-744-3p#hsa-miR-744-3p	1	0	0	0	0	0	0	0	0	0	0	0	0.59579	0.896436	0.613197
mmu-miR-744-5p#hsa-miR-744-5p#ptr-miR-744#bta-miR-744#ssc-miR-744#ppy-miR-744	3	4	9	3	2	0	1	2	6	8	2	5	0.717711	0.949185	0.21904
mmu-miR-7667-3p	1	2	8	0	0	0	1	2	0	1	0	2	0.176405	0.552491	1.28699
mmu-miR-7667-5p	71	56	87	38	22	0	84	42	18	50	1	62	0.0131527	0.0883088	1.94186
mmu-miR-7687-5p	0	0	0	0	0	0	0	0	1	0	0	0	0.842474	0.949185	0.229775
mne-miR-140	0	1	1	0	1	0	0	0	0	0	0	1	0.313912	0.743499	1.16504
oan-miR-1386	9	8	10	5	21	0	2	264	387	388	29	499	1.45517e-09	2.1128e-07	-3.80538
oan-miR-30f	0	0	0	0	0	0	0	0	0	0	0	0	#N/A	#N/A	#N/A
oan-miR-7427-5p	0	0	0	0	0	0	0	0	0	0	0	0	#N/A	#N/A	#N/A
oan-miR-92d	0	0	0	1	0	0	0	0	0	0	0	0	0.59579	0.896436	0.613197
pma-miR-192-5p	0	2	2	3	7	1	7	0	0	3	2	3	0.0241268	0.139502	2.08969
ppc-miR-2241a	0	0	0	0	0	0	0	0	0	0	0	0	#N/A	#N/A	#N/A
ppy-miR-151b	80	48	361	124	51	0	20	187	135	247	75	210	0.403005	0.829933	-0.372609
prd-miR-7911c-3p	0	0	0	0	0	0	0	0	0	0	0	0	#N/A	#N/A	#N/A
rrv-miR-rR1-4-5p	2	0	1	0	0	0	0	0	0	0	1	0	0.455254	0.884998	0.894801
sha-miR-716b	8	4	93	18	7	0	9	4	6	9	1	8	0.000323932	0.00584373	2.09904
spu-miR-10	1	0	0	0	0	0	0	1	0	1	0	1	0.928008	0.987103	0.106214
spu-miR-5993	0	0	0	0	0	0	0	0	0	0	0	0	#N/A	#N/A	#N/A
ssc-miR-1285	14	12	87	21	16	0	7	43	48	63	2	44	0.695077	0.949185	-0.214275
ssc-miR-4332	55	3	34	1	4	0	2	4	4	1	0	0	0.00356829	0.0362914	2.75063
tae-miR1134	0	0	0	0	0	0	0	0	0	0	0	0	#N/A	#N/A	#N/A
tca-miR-3815-3p	0	0	0	0	0	0	0	0	0	0	0	0	#N/A	#N/A	#N/A
tur-miR-10-5p	0	0	0	0	0	0	0	0	0	0	0	0	#N/A	#N/A	#N/A

## Sheet: 2.5_Plasma
	IR	IR	IR	IR	IR	IR	IR	Sham	Sham	Sham	Sham	Sham
miR	IRRCS_1_plasma	IRRCS_2_plasma	IRRCS_3_plasma	IRRCS_7_plasma	IRRCS_10_plasma	IRRCS_11_plasma	IRRCS_12_plasma	IRRCS_4_plasma	IRRCS_5_plasma	IRRCS_6_plasma	IRRCS_8_plasma	IRRCS_9_plasma	p.values.deseq2	p.values.adjust.BH	log2FoldChange
rno-let-7a-1-3p#rno-let-7c-2-3p	8	20	5	32	4	10	0	16	2	28	3	3	0.638641	0.849858	-0.23802
rno-let-7a-5p	1493	10545	4262	12699	1297	6273	520	3864	1767	2838	1366	1624	0.169742	0.429396	0.507915
rno-let-7b-3p	34	51	50	142	20	45	0	13	33	16	20	8	0.246147	0.515497	0.566811
rno-let-7b-5p	380	1110	490	1884	264	453	257	811	387	436	314	211	0.490206	0.745521	0.16821
rno-let-7c-5p	1396	5114	2479	8243	1286	2161	1054	3108	1660	1755	1249	1160	0.28725	0.566737	0.235841
rno-let-7d-3p	852	2695	1451	4263	585	1435	122	1792	1459	1002	777	471	0.817173	0.95258	-0.0870618
rno-let-7d-5p	474	2121	1008	2455	270	841	48	1508	646	940	434	399	0.650916	0.857196	-0.184592
rno-let-7e-3p	2	4	2	4	2	3	0	2	0	1	3	0	0.50387	0.755066	0.430126
rno-let-7e-5p	30	312	120	317	129	224	43	145	102	143	98	91	0.936598	0.986972	0.0281306
rno-let-7f-1-3p	4	3	8	18	5	8	0	13	3	6	4	1	0.903232	0.986972	-0.0624951
rno-let-7f-2-3p	1	11	4	12	4	3	0	4	2	8	2	2	0.977077	0.988096	-0.0154667
rno-let-7f-5p	2092	23326	7191	23429	2006	11513	1120	10044	2545	9532	1722	6340	0.860035	0.974452	0.0769693
rno-let-7i-3p	0	6	3	15	1	3	2	7	2	6	2	2	0.544005	0.788621	-0.3278
rno-let-7i-5p	1468	10248	3420	12237	1177	3396	643	8010	2125	6573	1551	4202	0.139383	0.384342	-0.555602
rno-miR-100-5p	52	129	82	289	113	72	81	139	91	240	206	38	0.171448	0.42997	-0.540953
rno-miR-101a-3p	51	139	63	317	77	88	58	110	56	483	44	381	0.00773897	0.0513586	-1.24901
rno-miR-101a-5p	21	97	37	207	65	66	23	94	45	441	32	334	0.000855935	0.00994052	-1.64401
rno-miR-101b-3p	43	111	44	199	37	67	37	115	29	223	19	191	0.0337891	0.144483	-0.945945
rno-miR-103-3p	232	1030	418	1191	167	420	130	996	235	476	178	412	0.321679	0.611071	-0.320863
rno-miR-106b-3p	195	255	185	470	63	107	116	187	137	234	109	112	0.981147	0.988096	-0.00741917
rno-miR-106b-5p	14	57	16	83	17	12	0	45	15	108	17	29	0.0297342	0.136496	-1.00437
rno-miR-107-3p	18	102	39	104	24	30	2	73	13	34	11	18	0.745387	0.933561	0.137621
rno-miR-10a-3p	43	63	56	235	75	96	3	19	5	17	9	2	1.77667e-06	4.32323e-05	2.23467
rno-miR-10a-5p	40003	48418	45834	183170	39862	54223	89470	23727	16817	30283	24142	15800	0.000905754	0.0100617	1.33845
rno-miR-10b-3p	4	7	15	41	4	11	2	4	7	8	4	4	0.379215	0.663627	0.409946
rno-miR-10b-5p	4	8	5	8	5	5	114	1	1	2	3	10	0.905881	0.986972	0.066831
rno-miR-122-5p	7	3	2	39	2	0	4	26	6	9	3	6	0.189446	0.446115	-0.730411
rno-miR-1249	3	0	4	8	0	2	0	0	4	4	5	1	0.337461	0.627064	-0.623031
rno-miR-125a-3p	8	25	8	44	26	13	7	8	5	10	5	4	0.015313	0.0841389	1.06792
rno-miR-125a-5p	229	442	347	1200	295	259	106	577	794	717	703	290	0.000345274	0.0045254	-1.13347
rno-miR-125b-1-3p	29	67	36	106	65	33	17	44	57	103	87	27	0.100671	0.311776	-0.646826
rno-miR-125b-2-3p	100	323	193	696	286	193	90	262	186	354	228	120	0.545396	0.788621	-0.189732
rno-miR-125b-5p	28	38	60	109	75	23	12	65	49	124	99	23	0.0940054	0.298365	-0.735982
rno-miR-126a-3p	73	219	122	427	139	213	6	221	117	383	203	65	0.160631	0.419082	-0.608238
rno-miR-126a-5p	705	3575	1368	6129	2324	2032	113	4520	2306	6299	3590	1208	0.0202409	0.102407	-1.01256
rno-miR-127-3p	119	234	159	920	145	238	30	203	97	201	311	101	0.518442	0.770093	-0.247336
rno-miR-128-1-5p	7	26	8	25	3	10	38	18	17	9	5	8	0.413309	0.687951	0.447251
rno-miR-128-3p	3121	18691	5901	20636	1806	8422	422	12122	3943	5166	3390	1904	0.912018	0.986972	0.0476728
rno-miR-129-5p	0	5	3	10	1	1	7	1	2	2	0	0	0.0917434	0.294802	1.10409
rno-miR-1306-5p	7	19	4	31	4	3	2	14	12	8	4	9	0.254509	0.524411	-0.51629
rno-miR-130a-3p	2162	9776	5712	17137	3894	5351	1095	2208	695	1781	703	746	1.31084e-10	6.69838e-09	1.81967
rno-miR-130b-3p	168	907	303	1064	94	338	121	619	194	533	163	115	0.851144	0.971062	-0.0622801
rno-miR-130b-5p	3	26	4	30	1	12	0	22	15	18	9	3	0.0859899	0.286631	-0.850394
rno-miR-132-3p	7	27	6	28	10	11	3	23	12	11	9	9	0.317184	0.604781	-0.392171
rno-miR-133a-3p	219	597	388	1223	517	598	12	620	1813	823	1739	304	0.00428352	0.0339801	-1.47581
rno-miR-133a-5p	12	48	27	99	21	17	6	29	23	77	41	121	0.00107963	0.0117381	-1.4729
rno-miR-133c	62	92	80	274	77	77	12	114	186	103	292	88	0.00230148	0.0212198	-1.2915
rno-miR-134-5p	6	24	18	49	11	17	0	7	8	12	5	4	0.14088	0.384342	0.638439
rno-miR-135a-5p	0	0	0	0	0	0	0	0	0	0	0	0	#N/A	#N/A	#N/A
rno-miR-136-3p	1	32	7	50	5	7	0	20	7	28	21	12	0.0411256	0.166787	-0.997832
rno-miR-138-5p	54	324	81	290	67	129	90	260	70	193	67	135	0.373457	0.663627	-0.305632
rno-miR-139-5p	8	28	18	37	5	14	0	15	15	12	22	8	0.242041	0.508984	-0.514761
rno-miR-1-3p	0	1	0	0	0	1	2	0	0	1	0	0	0.6135	0.831561	0.343176
rno-miR-140-3p	4657	16720	8770	26051	8215	7581	25251	15949	7399	21571	7603	8578	0.0469882	0.18329	-0.495416
rno-miR-140-5p	3	32	20	37	5	15	0	58	15	29	12	9	0.029741	0.136496	-0.971865
rno-miR-141-3p	2	7	3	11	2	3	0	7	1	15	4	1	0.172684	0.430446	-0.741145
rno-miR-141-5p	0	1	0	0	1	0	0	0	0	0	0	1	0.961894	0.988096	0.0306388
rno-miR-142-3p	13	96	26	102	12	38	2	98	18	217	12	94	0.00422522	0.0339801	-1.43135
rno-miR-142-5p	106	512	288	883	63	274	3	449	177	1492	145	271	0.0319217	0.144354	-1.10588
rno-miR-143-3p	617	4659	890	7251	889	1827	2314	10585	1756	8123	1477	6141	0.00449052	0.0343115	-1.28029
rno-miR-143-5p	0	0	0	1	0	0	1	3	0	1	0	0	0.440025	0.718841	-0.525732
rno-miR-144-3p	12	7	17	43	5	11	0	10	16	162	15	21	0.00134263	0.0137216	-1.72981
rno-miR-144-5p	61	62	104	171	25	50	5	15	53	288	33	47	0.224814	0.495212	-0.610826
rno-miR-145-3p	1	3	2	8	1	2	0	4	1	6	2	2	0.25593	0.524907	-0.662237
rno-miR-145-5p	43	74	49	171	26	33	19	138	71	104	46	29	0.00574879	0.0400571	-0.79138
rno-miR-146a-5p	123	394	120	760	103	160	130	427	143	440	206	121	0.092306	0.294802	-0.488708
rno-miR-146b-5p	64	363	77	473	21	83	31	459	67	274	70	98	0.0622099	0.230357	-0.778378
rno-miR-147	2	2	3	5	2	2	0	3	1	9	1	5	0.138574	0.384342	-0.862501
rno-miR-148b-3p	14	144	70	223	20	46	3	134	36	116	29	53	0.157794	0.415633	-0.610062
rno-miR-148b-5p	6	27	11	42	3	7	5	30	8	28	5	8	0.177902	0.437058	-0.548856
rno-miR-150-3p	94	154	167	196	68	97	124	98	246	161	113	70	0.443281	0.7191	-0.314396
rno-miR-150-5p	1151	1517	1777	3131	1412	1891	626	1898	4153	2299	2257	3003	0.00246949	0.0221388	-1.11765
rno-miR-151-3p	3152	10361	4633	18555	1700	3905	367	11198	5577	6057	4010	2168	0.146316	0.395595	-0.56704
rno-miR-151-5p	237	839	459	1748	293	583	163	478	149	287	196	96	0.00128358	0.0133859	0.829871
rno-miR-152-3p	22	62	35	125	29	34	0	43	25	191	33	33	0.0538338	0.206835	-0.908229
rno-miR-152-5p	6	11	6	32	13	3	3	15	8	31	10	13	0.0416976	0.167775	-0.881399
rno-miR-155-5p	0	1	1	3	0	1	0	1	0	0	0	0	0.568151	0.808283	0.389835
rno-miR-15b-3p	6	14	4	9	3	1	0	23	4	20	3	4	0.0440813	0.175021	-1.05468
rno-miR-15b-5p	104	193	111	537	106	112	6	248	104	587	88	149	0.0379063	0.156211	-0.895724
rno-miR-16-3p	0	4	0	6	1	0	0	9	2	6	1	2	0.0268164	0.128067	-1.39985
rno-miR-16-5p	3691	7860	3665	16830	1946	3161	52	13144	4461	13407	3465	1388	0.111152	0.321516	-0.803251
rno-miR-17-1-3p	1	9	4	15	1	1	0	16	1	9	1	2	0.221458	0.49417	-0.711785
rno-miR-17-5p	100	540	140	647	27	165	6	709	130	373	89	61	0.184751	0.445319	-0.664784
rno-miR-181a-1-3p	25	74	39	148	30	53	62	67	21	50	29	34	0.383642	0.666806	0.316969
rno-miR-181a-2-3p	10	24	10	49	12	11	14	34	24	24	22	24	0.0126077	0.0723882	-0.879927
rno-miR-181a-5p	8452	20177	11939	37533	10079	13576	2171	16436	9443	15337	10267	7993	0.462904	0.732334	-0.202824
rno-miR-181b-1-3p	0	0	0	0	1	0	0	1	0	3	0	1	0.23812	0.506997	-0.806716
rno-miR-181b-5p	947	2550	1051	3660	590	1523	1124	1473	686	1020	538	735	0.0837366	0.281509	0.497825
rno-miR-181c-3p	69	474	144	640	29	127	141	412	81	202	89	207	0.498848	0.75371	-0.284811
rno-miR-181c-5p	436	2786	832	3175	253	786	23	2339	482	1158	463	590	0.440307	0.718841	-0.36736
rno-miR-181d-5p	216	1405	494	1456	131	451	457	947	340	413	201	343	0.714555	0.915488	0.138539
rno-miR-182	244	333	295	1733	229	460	1050	18	8	23	10	8	3.79518e-21	4.84834e-19	4.62817
rno-miR-183-3p	6	20	7	53	13	11	3	0	0	0	0	0	3.79031e-09	1.21053e-07	3.77373
rno-miR-183-5p	98	74	70	488	54	127	28	3	2	3	2	1	1.17441e-22	5.50238e-20	4.54081
rno-miR-1839-3p	0	2	2	7	1	6	0	4	2	5	1	0	0.705836	0.910813	-0.236944
rno-miR-1839-5p	84	250	156	590	169	270	99	84	43	100	28	81	0.000109346	0.00174612	1.25584
rno-miR-184	0	2	1	0	9	0	3	15	0	14	2	17	0.214887	0.483732	-0.864707
rno-miR-1843-3p	17	41	44	117	25	36	69	9	4	5	7	5	2.4492e-07	6.58705e-06	2.44529
rno-miR-1843-5p	6	33	13	66	9	28	2	39	6	16	13	15	0.539957	0.788621	-0.252528
rno-miR-185-5p	0	2	2	9	2	3	2	3	2	4	0	3	0.757302	0.938936	-0.1836
rno-miR-186-5p	1599	4712	1733	6580	499	1618	117	4129	961	2207	1102	501	0.842551	0.967514	-0.086706
rno-miR-187-3p	1	5	6	8	3	3	1	3	3	5	2	2	0.92344	0.986972	-0.0517739
rno-miR-188-5p	36	84	48	152	50	56	48	102	34	111	49	85	0.164483	0.420254	-0.459107
rno-miR-18a-3p	19	35	28	57	22	24	5	32	26	34	11	24	0.378678	0.663627	-0.299179
rno-miR-18a-5p	7	28	3	17	3	10	0	18	7	18	3	5	0.399317	0.680169	-0.415621
rno-miR-190a-5p	0	0	0	0	0	0	0	0	0	0	0	0	#N/A	#N/A	#N/A
rno-miR-190b-5p	0	0	0	0	0	0	0	0	0	0	0	0	#N/A	#N/A	#N/A
rno-miR-191a-3p	26	100	28	120	12	44	4	80	16	64	23	24	0.447199	0.723161	-0.293047
rno-miR-191a-5p	82170	408696	126060	577253	19917	112907	8158	436385	136487	188611	106457	42345	0.250397	0.522256	-0.545202
rno-miR-191b	12	49	11	64	0	21	0	47	8	32	8	16	0.314977	0.602821	-0.530537
rno-miR-192-3p	1	4	12	25	3	12	3	1	0	1	0	0	8.35021e-05	0.00137644	2.52145
rno-miR-192-5p	34683	40492	34460	221631	31687	63191	10459	11862	3306	14343	4289	4407	1.42361e-12	1.03923e-10	2.34889
rno-miR-193-3p	71	75	79	203	85	52	25	58	49	122	38	48	0.777879	0.940921	0.0966918
rno-miR-194-3p	1	0	1	10	1	6	2	1	0	1	2	0	0.19487	0.454696	0.869116
rno-miR-194-5p	5	12	11	59	3	12	0	13	1	13	2	2	0.343473	0.630951	0.495494
rno-miR-195-3p	3	8	3	16	3	3	5	12	4	15	7	9	0.0229749	0.1151	-1.00389
rno-miR-195-5p	0	3	1	7	3	2	0	9	1	11	0	0	0.225826	0.495212	-0.782138
rno-miR-196a-3p	0	0	0	1	0	1	0	0	0	2	0	0	0.784657	0.94122	-0.169058
rno-miR-196a-5p	0	0	0	2	0	0	0	0	0	0	1	0	0.930466	0.986972	-0.0487119
rno-miR-196b-3p	0	1	0	0	0	0	0	1	0	0	0	0	0.92318	0.986972	-0.0497481
rno-miR-196b-5p	1	24	10	10	5	12	1	9	3	4	0	3	0.188535	0.446115	0.723747
rno-miR-196c-3p	0	0	0	0	0	1	0	0	0	0	1	0	0.907815	0.986972	-0.0660354
rno-miR-196c-5p	0	0	0	0	0	0	0	0	0	0	0	0	#N/A	#N/A	#N/A
rno-miR-199a-3p	59	238	92	670	234	170	9	512	159	919	262	199	0.00580083	0.0400571	-1.261
rno-miR-199a-5p	5	19	3	45	20	20	2	37	9	52	25	14	0.0252195	0.123915	-1.0197
rno-miR-19a-3p	2	19	9	16	2	5	0	34	7	76	4	20	0.000171578	0.00257871	-1.94374
rno-miR-19b-3p	6	129	36	116	8	35	11	186	41	278	21	140	0.000217557	0.00305683	-1.78203
rno-miR-200a-3p	16	27	28	132	23	35	0	5	8	21	3	5	0.00960326	0.0591237	1.27706
rno-miR-200a-5p	2	2	0	7	2	6	2	0	0	0	0	0	0.00380403	0.0318665	1.99991
rno-miR-200b-3p	0	0	0	0	0	3	2	0	1	1	0	1	0.92397	0.986972	0.0661958
rno-miR-200b-5p	3	4	7	15	3	6	2	0	0	0	1	0	0.000191088	0.00278989	2.44016
rno-miR-200c-3p	1	1	0	0	0	1	0	0	0	1	0	0	0.794688	0.9509	0.171654
rno-miR-201-3p	0	0	0	0	0	0	0	0	0	0	0	0	#N/A	#N/A	#N/A
rno-miR-201-5p	0	0	0	1	0	0	0	0	0	3	1	0	0.343867	0.630951	-0.61262
rno-miR-203a-3p	196	393	324	1364	358	507	43	48	29	99	31	45	3.08419e-10	1.43275e-08	2.39989
rno-miR-203a-5p	6	11	12	45	4	16	33	1	0	0	0	0	1.64022e-08	4.9303e-07	3.62435
rno-miR-203b-3p	12	13	19	62	7	20	36	1	0	1	0	1	1.63474e-09	5.56903e-08	3.60086
rno-miR-203b-5p	178	376	305	1261	322	464	43	23	17	67	21	28	1.06513e-13	9.07134e-12	2.90468
rno-miR-204-3p	5	7	7	7	5	10	4	0	1	0	0	0	2.74107e-05	0.000500245	2.72126
rno-miR-204-5p	0	1	2	6	0	0	0	0	2	3	1	1	0.377961	0.663627	-0.606404
rno-miR-205	47	42	55	163	65	70	11	36	62	71	71	31	0.573036	0.808283	-0.225346
rno-miR-208a-3p	0	0	0	0	1	1	1	0	1	5	3	2	0.0366248	0.152157	-1.42871
rno-miR-208b-3p	2	3	3	7	3	2	0	3	1	29	8	1	0.0180252	0.0969568	-1.40036
rno-miR-20a-5p	7	91	15	121	7	31	1	96	12	93	20	27	0.0688956	0.247874	-0.891647
rno-miR-20b-5p	0	4	0	9	1	3	0	7	2	1	3	0	0.392349	0.672787	-0.553862
rno-miR-210-3p	92	495	184	688	125	198	90	484	130	402	148	196	0.0758306	0.261821	-0.481912
rno-miR-211-3p	3	38	9	0	2	2	0	10	9	12	3	5	0.567698	0.808283	-0.354623
rno-miR-212-3p	3	22	5	17	5	4	2	12	8	9	6	3	0.472093	0.737735	-0.327446
rno-miR-21-3p	54	207	87	392	43	101	51	150	27	171	35	45	0.526067	0.776938	0.210371
rno-miR-214-3p	16	28	23	99	23	19	5	44	20	49	35	11	0.111367	0.321516	-0.56049
rno-miR-215	519	1404	776	3626	665	1021	584	1988	1183	3934	1548	1545	8.91084e-06	0.000182138	-1.17309
rno-miR-21-5p	296	2953	984	4145	403	1140	120	3136	529	3632	486	1632	0.0339574	0.144483	-0.934803
rno-miR-218a-1-3p	3	6	8	25	2	6	0	0	0	0	0	0	4.87406e-05	0.000858843	2.73101
rno-miR-218a-5p	1	0	0	5	0	1	0	1	0	1	0	0	0.752551	0.938014	0.216759
rno-miR-218b	0	0	0	2	0	1	0	0	0	0	0	0	0.815537	0.95258	0.121265
rno-miR-219a-1-3p	7	14	13	18	3	8	18	6	3	8	8	6	0.228807	0.495212	0.600616
rno-miR-219a-2-3p	3	17	19	41	11	15	29	0	0	0	0	0	5.66777e-10	2.22787e-08	4.00063
rno-miR-219a-5p	0	2	2	7	3	5	0	0	0	0	0	1	0.0334919	0.144483	1.4695
rno-miR-219b	7	21	20	51	14	19	31	1	0	1	0	0	1.20185e-10	6.69838e-09	3.86981
rno-miR-221-3p	108	430	168	738	138	189	0	329	98	391	108	49	0.827175	0.954145	-0.114332
rno-miR-221-5p	0	1	0	0	0	0	1	1	0	1	2	0	0.36406	0.652753	-0.628514
rno-miR-222-3p	18	34	39	58	23	32	8	28	9	49	21	11	0.820226	0.95258	0.0819354
rno-miR-223-3p	129	705	209	903	63	255	4	802	173	575	245	147	0.107716	0.320877	-0.778222
rno-miR-223-5p	15	156	51	159	9	49	51	145	38	55	18	17	0.899675	0.986972	0.0571681
rno-miR-22-3p	18682	66646	32795	130938	22616	34607	1706	49691	18776	47187	21356	9113	0.976729	0.988096	0.0119903
rno-miR-224-5p	2	14	9	45	36	6	0	22	11	42	18	3	0.466148	0.732601	-0.415363
rno-miR-22-5p	17	63	45	162	28	39	2	13	8	14	12	6	0.000560793	0.0069894	1.40247
rno-miR-23a-3p	122	497	178	751	113	188	30	469	144	356	155	82	0.289875	0.569716	-0.357195
rno-miR-23b-3p	7	31	17	70	20	21	2	25	9	36	13	4	0.985945	0.988096	0.00722774
rno-miR-24-1-5p	0	0	0	0	0	0	0	0	0	1	0	0	0.811332	0.95258	-0.123103
rno-miR-24-2-5p	47	222	59	337	54	94	10	176	46	332	58	93	0.0613748	0.230357	-0.743502
rno-miR-24-3p	97	620	175	777	202	205	143	501	117	382	191	136	0.703568	0.910185	-0.119821
rno-miR-25-3p	7300	12853	7499	25951	7007	5337	6977	17894	8744	14953	8135	6375	0.205231	0.470284	-0.363468
rno-miR-25-5p	14	13	11	17	7	6	6	13	18	13	5	11	0.326068	0.612575	-0.428569
rno-miR-26a-3p	0	0	0	2	0	0	0	2	0	1	0	0	0.573836	0.808283	-0.352562
rno-miR-26a-5p	1086	5366	1833	8238	504	1858	82	4847	880	2827	917	543	0.764134	0.938936	-0.140626
rno-miR-26b-3p	7	26	11	35	1	14	17	30	7	18	7	20	0.45911	0.729351	-0.343794
rno-miR-26b-5p	51	313	84	417	44	104	8	307	56	276	49	92	0.149208	0.397111	-0.614833
rno-miR-27a-3p	121	897	236	974	122	217	19	712	129	793	194	157	0.176327	0.435281	-0.591273
rno-miR-27a-5p	4	30	19	53	16	19	0	10	20	29	6	3	0.983246	0.988096	0.0103409
rno-miR-27b-3p	397	1577	612	3160	639	649	45	2187	654	3319	927	737	0.00918982	0.0582256	-1.07838
rno-miR-27b-5p	1	2	1	3	0	2	0	3	0	1	0	1	0.977629	0.988096	-0.0192283
rno-miR-28-3p	1476	5299	2494	8780	1484	2743	1827	3828	1804	2057	1423	1167	0.224903	0.495212	0.300802
rno-miR-28-5p	15	106	27	161	15	56	0	115	21	70	28	25	0.284832	0.564144	-0.502866
rno-miR-298-5p	25	25	24	51	15	20	14	22	40	26	24	25	0.164159	0.420254	-0.524594
rno-miR-29a-3p	280	957	621	2546	391	667	60	485	143	891	238	139	0.228241	0.495212	0.468305
rno-miR-29a-5p	0	3	0	0	0	2	0	0	1	1	0	2	0.637861	0.849858	-0.326613
rno-miR-29b-2-5p	3	2	1	4	1	5	0	1	0	1	0	0	0.069851	0.247874	1.24407
rno-miR-29b-3p	2	9	4	19	4	4	2	1	1	7	1	1	0.140182	0.384342	0.818368
rno-miR-29c-3p	12	75	31	183	46	58	18	39	10	66	13	23	0.20147	0.465843	0.49245
rno-miR-29c-5p	0	2	2	5	2	1	0	1	1	2	5	0	0.459591	0.729351	-0.484767
rno-miR-300-3p	9	11	9	43	16	17	0	11	6	8	10	2	0.34739	0.633987	0.450194
rno-miR-301a-3p	81	377	178	467	62	153	2	418	151	685	108	127	0.0344949	0.144483	-1.00546
rno-miR-301b-3p	6	28	10	59	4	8	1	30	7	29	6	16	0.100652	0.311776	-0.711308
rno-miR-3065-5p	1	1	3	1	0	0	0	1	0	1	0	0	0.603376	0.821452	0.360864
rno-miR-3068-3p	33	76	43	173	36	96	11	45	13	52	24	22	0.0776605	0.265184	0.588724
rno-miR-3068-5p	0	0	0	1	0	0	0	0	0	0	0	0	0.972826	0.988096	0.0175666
rno-miR-3085	8	2	5	19	8	11	5	0	0	0	1	0	9.46372e-06	0.000185999	2.87055
rno-miR-30a-3p	67	176	66	447	71	114	272	236	56	145	101	72	0.312664	0.600643	-0.28223
rno-miR-30a-5p	3903	10265	4772	23259	4601	7029	1261	10919	3626	7541	4095	5255	0.374687	0.663627	-0.247645
rno-miR-30b-3p	0	2	2	3	3	1	0	3	1	0	0	1	0.771201	0.938936	0.197711
rno-miR-30b-5p	139	607	229	1285	164	317	87	774	194	504	219	346	0.0336873	0.144483	-0.620735
rno-miR-30c-1-3p	5	22	10	34	7	13	3	18	10	21	6	6	0.420504	0.695396	-0.299422
rno-miR-30c-2-3p	21	46	24	81	20	26	28	47	15	26	19	25	0.825245	0.954145	0.0751539
rno-miR-30c-5p	687	2160	878	3414	344	1038	174	2331	649	971	474	545	0.536074	0.788621	-0.206739
rno-miR-30d-3p	0	4	3	11	1	3	0	8	3	5	0	4	0.18785	0.446115	-0.764303
rno-miR-30d-5p	2748	10152	4768	19607	1863	4279	444	8090	3737	4060	3351	1636	0.738817	0.927605	-0.124642
rno-miR-30e-3p	48	184	62	296	37	83	174	220	54	167	52	93	0.991779	0.991779	-0.00455793
rno-miR-30e-5p	499	2636	945	3108	323	853	57	2764	604	1961	548	592	0.165363	0.420402	-0.587767
rno-miR-3102	1	5	4	9	3	5	0	1	0	1	1	0	0.0252133	0.123915	1.45538
rno-miR-3120	0	2	2	4	1	1	0	2	0	9	0	0	0.423946	0.698827	-0.546412
rno-miR-31a-5p	2	10	2	16	2	8	1	70	11	19	5	6	0.000120115	0.00185997	-1.92277
rno-miR-320-3p	4817	8547	7867	17310	6297	6400	17259	3689	3336	4276	2499	2565	0.00182662	0.0176113	1.39734
rno-miR-322-3p	93	216	115	410	195	170	8	278	135	351	181	99	0.148272	0.397111	-0.600753
rno-miR-322-5p	4	44	19	59	4	14	0	36	10	51	5	8	0.252811	0.523023	-0.567088
rno-miR-324-3p	54	69	49	175	26	45	0	65	38	42	28	22	0.957251	0.988096	0.0234029
rno-miR-324-5p	11	33	20	93	17	7	9	19	4	23	9	7	0.171651	0.42997	0.546145
rno-miR-32-5p	1	1	1	3	0	0	0	2	0	4	0	0	0.553881	0.795037	-0.412738
rno-miR-326-3p	69	305	152	384	42	120	35	145	64	77	42	42	0.0905005	0.294572	0.520576
rno-miR-328a-3p	1058	2426	1797	4166	503	1469	211	1409	1396	930	619	305	0.545967	0.788621	0.222994
rno-miR-330-3p	32	92	41	176	17	25	6	58	36	23	21	9	0.590615	0.811302	0.212842
rno-miR-330-5p	0	35	16	42	5	9	3	33	3	14	6	5	0.81286	0.95258	-0.119783
rno-miR-331-3p	2	9	11	11	3	3	4	11	3	7	8	9	0.184472	0.445319	-0.629655
rno-miR-33-3p	1	0	1	3	0	0	0	3	2	3	0	3	0.0441834	0.175021	-1.35921
rno-miR-335	6	8	9	42	6	11	12	33	15	86	9	27	0.000901757	0.0100617	-1.45997
rno-miR-33-5p	0	0	0	1	0	1	0	0	0	0	0	2	0.752614	0.938014	-0.205032
rno-miR-338-3p	1	1	1	2	0	0	0	1	0	1	0	0	0.831095	0.956508	0.147886
rno-miR-339-3p	181	771	296	953	127	289	127	425	186	321	178	181	0.804835	0.95258	0.0606466
rno-miR-339-5p	223	864	305	1247	146	359	27	576	217	491	237	180	0.578419	0.808283	-0.20534
rno-miR-340-3p	2	12	4	11	1	5	0	6	2	5	1	0	0.58861	0.810726	0.310183
rno-miR-340-5p	0	10	3	9	1	3	1	12	2	13	2	18	0.00501008	0.0365736	-1.56431
rno-miR-341	14	57	56	114	19	52	151	25	18	31	52	34	0.778884	0.940921	-0.108637
rno-miR-342-3p	247	462	321	787	265	320	656	312	289	338	190	241	0.208556	0.472528	0.527064
rno-miR-342-5p	15	24	15	45	4	25	22	24	21	22	14	8	0.970758	0.988096	-0.0150252
rno-miR-345-3p	48	125	82	271	79	128	151	82	26	87	39	41	0.0120741	0.0704922	0.992958
rno-miR-345-5p	2	5	6	13	1	4	1	6	4	6	1	1	0.845176	0.968352	-0.103513
rno-miR-3473	1365	1259	1878	4967	2067	1517	3527	1750	1026	2905	565	992	0.10901	0.320877	0.718896
rno-miR-34a-5p	2	4	0	1	0	2	0	5	1	3	1	0	0.42865	0.704309	-0.531666
rno-miR-34b-5p	0	0	0	0	0	0	0	0	0	0	0	0	#N/A	#N/A	#N/A
rno-miR-34c-5p	1	7	1	10	0	6	0	6	3	4	2	2	0.454394	0.72561	-0.430129
rno-miR-350	0	0	0	3	0	0	0	1	0	1	0	0	0.796449	0.9509	-0.157337
rno-miR-351-5p	107	374	208	540	69	144	47	317	230	231	188	85	0.0619709	0.230357	-0.553361
rno-miR-3543	58	125	90	323	96	116	324	79	70	56	92	88	0.108682	0.320877	0.804428
rno-miR-3553	93	71	70	490	52	126	30	3	2	2	3	1	3.20907e-22	5.50238e-20	4.4954
rno-miR-3556a	2	12	7	23	4	7	0	1	0	1	2	0	0.00178611	0.017552	1.90206
rno-miR-3556b	210	616	454	1812	244	474	62	95	46	232	76	33	1.05878e-06	2.70518e-05	1.78656
rno-miR-3557-3p	14	15	10	79	10	16	2	8	6	8	5	2	0.0178677	0.0969568	1.04524
rno-miR-3557-5p	18423	29803	24992	108175	35178	49129	18277	12720	6673	15189	10725	9697	1.33543e-05	0.000252743	1.37523
rno-miR-3559-3p	2	16	2	12	2	3	2	23	7	5	8	8	0.0134287	0.0762451	-1.21028
rno-miR-3559-5p	1	8	2	10	1	2	2	16	1	13	2	16	0.00432232	0.0339801	-1.56381
rno-miR-3560	6	3	8	20	3	5	0	10	6	9	4	3	0.390312	0.671857	-0.414413
rno-miR-3570	24	70	36	138	28	49	59	64	23	48	29	33	0.48815	0.745504	0.251353
rno-miR-3571	0	1	0	0	0	1	0	0	1	0	0	0	0.962388	0.988096	0.0293016
rno-miR-3574	83	470	175	656	126	178	85	465	122	388	141	189	0.0739609	0.257102	-0.497995
rno-miR-3577	9	10	11	21	6	11	24	7	8	8	8	5	0.188771	0.446115	0.659243
rno-miR-3585-3p	1	0	1	1	1	0	1	2	3	2	2	3	0.0287823	0.136183	-1.41362
rno-miR-3585-5p	0	2	0	0	5	0	0	0	0	1	0	0	0.492164	0.746278	0.368463
rno-miR-3586-3p	146	610	267	1010	108	298	68	428	131	218	158	71	0.419636	0.695396	0.251293
rno-miR-3587	2	10	7	27	3	7	2	2	1	8	1	2	0.114162	0.327735	0.829304
rno-miR-3588	28	30	55	103	68	21	11	64	47	120	91	16	0.100199	0.311776	-0.741431
rno-miR-3589	24	59	40	113	18	36	0	49	19	37	15	12	0.772008	0.938936	0.11692
rno-miR-3590-3p	9	8	6	13	7	1	0	8	4	27	7	2	0.231796	0.497679	-0.64626
rno-miR-3590-5p	1928	8624	5215	15231	3363	4587	927	1466	515	1130	533	473	6.97889e-15	7.13243e-13	2.17818
rno-miR-3596a	4634	36448	12899	41364	4171	18668	2460	15764	5504	13075	3992	8476	0.5457	0.788621	0.221865
rno-miR-3596b	449	2049	970	2346	258	790	48	1431	614	896	412	391	0.652543	0.857196	-0.182503
rno-miR-3596c	14	78	49	108	65	79	12	59	51	82	39	48	0.382476	0.666806	-0.327369
rno-miR-3596d	21	98	31	144	46	65	3	63	32	122	25	90	0.109889	0.320877	-0.701737
rno-miR-361-3p	8	32	15	64	10	16	0	41	31	24	18	5	0.0711888	0.250879	-0.774567
rno-miR-361-5p	17	40	23	81	13	34	0	15	11	22	11	1	0.148658	0.397111	0.669415
rno-miR-362-3p	1	3	0	6	2	2	0	4	4	12	2	6	0.00461378	0.0346712	-1.60497
rno-miR-362-5p	0	0	0	1	0	2	0	0	1	0	0	0	0.864651	0.975356	0.108198
rno-miR-363-3p	17	55	18	77	5	41	1	71	11	59	34	14	0.100219	0.311776	-0.735676
rno-miR-365-3p	9	8	9	33	7	5	0	4	2	12	8	1	0.547868	0.788621	0.311777
rno-miR-365-5p	18	19	34	66	12	35	28	1	4	3	8	2	6.20079e-06	0.000132025	2.24194
rno-miR-374-3p	1	0	0	0	0	0	0	0	1	0	0	1	0.664354	0.870475	-0.282398
rno-miR-374-5p	0	4	1	7	1	2	0	3	1	0	0	0	0.483239	0.744069	0.482025
rno-miR-375-3p	102	76	167	393	135	143	141	19	38	39	30	23	2.19886e-06	5.10735e-05	1.94468
rno-miR-378a-3p	25120	36861	31561	141054	42836	60695	29532	17012	8622	19563	13378	11665	5.81071e-06	0.000129099	1.43573
rno-miR-378a-5p	14	15	10	77	11	16	1	8	6	9	5	3	0.0344943	0.144483	0.938548
rno-miR-378b	4	14	10	42	14	25	8	6	1	4	3	6	0.00316399	0.0274034	1.40023
rno-miR-379-5p	0	0	0	0	0	0	0	0	0	0	0	0	#N/A	#N/A	#N/A
rno-miR-381-3p	3	14	7	47	14	20	14	10	6	8	11	12	0.506492	0.756776	0.305561
rno-miR-382-3p	1	3	4	2	0	0	11	3	2	2	6	4	0.915442	0.986972	-0.0695269
rno-miR-382-5p	0	2	1	8	0	1	0	7	4	0	0	0	0.309681	0.600168	-0.701698
rno-miR-383-5p	28	365	113	274	14	104	52	239	40	54	29	53	0.624699	0.8445	0.224866
rno-miR-409a-3p	6	13	10	31	6	11	3	1	4	4	6	7	0.202632	0.466419	0.600368
rno-miR-409b	21	26	27	75	25	27	13	10	22	12	19	13	0.272901	0.549025	0.431178
rno-miR-410-3p	10	28	20	86	18	35	2	21	13	26	21	13	0.916476	0.986972	-0.0394844
rno-miR-411-5p	1	2	0	4	1	0	1	2	1	2	3	0	0.412987	0.687951	-0.542622
rno-miR-421-3p	73	174	97	362	57	131	9	109	54	67	38	15	0.107766	0.320877	0.603799
rno-miR-423-3p	4425	5835	6577	16242	3933	6278	2552	2359	3104	2603	1973	1693	0.000704776	0.00837536	0.945802
rno-miR-423-5p	10983	18859	16955	28550	6982	11697	6015	9464	13819	10802	7380	5221	0.556513	0.796578	0.176398
rno-miR-425-3p	9	24	14	44	3	16	0	29	5	13	8	4	0.852556	0.971062	-0.0840893
rno-miR-425-5p	547	1510	791	2572	239	653	28	1222	519	645	475	124	0.986163	0.988096	-0.00784636
rno-miR-429	17	18	18	85	15	41	0	2	2	10	5	1	0.000575921	0.00700704	1.82445
rno-miR-434-3p	53	113	80	290	91	101	290	67	68	52	87	84	0.1362	0.380317	0.750318
rno-miR-449a-5p	0	2	0	1	1	0	2	0	0	4	0	0	0.908971	0.986972	0.0795029
rno-miR-450a-5p	1	5	2	13	1	3	0	10	0	5	6	2	0.160744	0.419082	-0.802794
rno-miR-451-5p	775	416	565	1722	236	290	35	848	534	2092	363	368	0.0863818	0.286631	-0.783742
rno-miR-455-3p	1	3	4	4	0	0	2	2	0	1	1	4	0.857999	0.974306	-0.117095
rno-miR-455-5p	1	0	4	6	4	4	0	15	5	16	6	11	0.000221336	0.00305683	-1.92014
rno-miR-466b-2-3p	8	14	8	20	2	12	2	2	1	5	2	0	0.00474472	0.0351384	1.50707
rno-miR-466c-5p	1	3	1	8	2	2	0	5	1	1	2	0	0.920869	0.986972	-0.0628169
rno-miR-484	183	248	223	447	116	124	53	148	192	159	92	55	0.58209	0.808283	0.183016
rno-miR-488-3p	0	18	6	23	1	4	0	31	3	30	5	22	0.00232545	0.0212198	-1.66995
rno-miR-489-3p	0	0	0	2	0	0	0	0	0	2	0	0	0.765957	0.938936	-0.165863
rno-miR-490-3p	3	8	0	25	15	9	0	15	10	32	39	9	0.00881704	0.0577629	-1.46992
rno-miR-494-3p	6	14	6	17	10	7	14	7	2	3	5	1	0.0193244	0.100763	1.20844
rno-miR-496-3p	0	0	0	0	0	0	0	0	0	1	0	0	0.811332	0.95258	-0.123103
rno-miR-497-5p	28	91	29	129	77	61	2	174	42	242	51	126	0.00710269	0.048393	-1.25439
rno-miR-499-3p	0	0	0	0	0	0	0	0	0	1	0	0	0.811332	0.95258	-0.123103
rno-miR-499-5p	0	1	0	2	2	0	1	0	1	1	5	0	0.33008	0.615586	-0.674541
rno-miR-500-3p	4	13	3	20	5	4	1	7	1	11	4	2	0.930193	0.986972	0.0434653
rno-miR-501-3p	7	4	8	20	3	5	0	10	6	9	5	4	0.339219	0.628046	-0.447383
rno-miR-503-3p	7	21	10	29	13	9	1	15	24	10	7	9	0.25227	0.523023	-0.504834
rno-miR-504	48	34	74	156	48	91	17	2	9	4	7	4	1.45703e-09	5.31817e-08	2.74976
rno-miR-505-3p	31	43	29	80	19	37	0	36	16	39	16	20	0.953097	0.988096	-0.0237256
rno-miR-532-3p	19	16	32	78	21	29	4	32	28	23	17	12	0.733233	0.925141	-0.128992
rno-miR-532-5p	24	142	47	236	20	58	90	171	31	150	40	96	0.344492	0.630951	-0.41368
rno-miR-541-5p	5	6	6	11	3	1	3	9	3	3	1	3	0.880822	0.986972	0.0788116
rno-miR-542-3p	1	18	2	21	2	7	0	8	5	23	2	8	0.118313	0.335878	-0.832266
rno-miR-542-5p	7	20	23	36	18	15	5	30	18	31	30	21	0.0121396	0.0704922	-0.910839
rno-miR-547-5p	0	0	0	0	2	0	0	0	0	0	0	0	0.81096	0.95258	0.130982
rno-miR-582-3p	7	11	10	57	13	20	24	32	17	28	24	21	0.208647	0.472528	-0.537652
rno-miR-582-5p	0	0	0	0	0	0	0	0	1	0	0	0	0.811332	0.95258	-0.123103
rno-miR-598-3p	1	0	5	12	7	8	6	0	2	2	3	4	0.269971	0.545276	0.684536
rno-miR-615	1	10	3	9	4	0	6	3	6	3	3	2	0.913778	0.986972	0.0620903
rno-miR-6215	1	2	2	6	1	1	0	1	0	1	1	0	0.351344	0.636591	0.636931
rno-miR-6315	2	7	2	16	0	3	8	2	4	1	0	2	0.197175	0.457984	0.794334
rno-miR-6328	62	386	173	375	29	175	110	219	150	122	64	68	0.729918	0.923238	0.130991
rno-miR-6329	6	19	11	56	5	11	4	26	5	24	1	19	0.310067	0.600168	-0.463936
rno-miR-652-3p	115	275	151	556	54	129	7	168	94	151	72	16	0.579896	0.808283	0.242748
rno-miR-653-5p	0	1	0	0	0	0	0	0	0	0	0	0	0.938686	0.986972	0.0396731
rno-miR-664-2-5p	5	9	10	18	6	5	4	11	8	9	3	1	0.943876	0.988096	0.0317751
rno-miR-664-3p	6	12	13	32	6	12	1	6	3	5	5	0	0.0411121	0.166787	0.97148
rno-miR-667-3p	0	5	6	4	1	5	7	0	0	1	0	7	0.404886	0.687364	0.560511
rno-miR-671	52	104	67	206	34	57	53	53	54	41	31	25	0.0905045	0.294572	0.526761
rno-miR-672-3p	1	3	1	7	1	4	0	0	0	0	0	0	0.0190238	0.100218	1.63131
rno-miR-672-5p	1	2	2	5	0	0	1	0	2	1	1	0	0.78411	0.94122	0.187613
rno-miR-674-3p	45	72	71	142	45	47	5	52	61	52	53	16	0.755584	0.938936	-0.122713
rno-miR-674-5p	5	3	5	9	1	2	3	8	5	5	3	1	0.488735	0.745504	-0.363097
rno-miR-702-3p	4	6	10	23	3	5	9	6	7	5	3	1	0.309938	0.600168	0.505543
rno-miR-708-3p	3	3	2	7	2	4	2	1	1	5	1	1	0.467373	0.732601	0.428992
rno-miR-708-5p	0	0	0	2	2	0	1	0	0	1	0	0	0.574329	0.808283	0.383329
rno-miR-743b-3p	0	0	0	0	0	0	0	0	0	0	0	0	#N/A	#N/A	#N/A
rno-miR-760-3p	13	17	39	47	13	21	31	9	10	6	5	4	0.00119366	0.0127075	1.51454
rno-miR-7a-1-3p	3	14	4	20	3	5	0	14	3	5	5	1	0.714833	0.915488	-0.18514
rno-miR-7a-5p	0	1	0	0	0	0	0	1	0	1	0	0	0.72466	0.921148	-0.21012
rno-miR-802-3p	2	2	2	4	0	0	0	4	1	1	2	0	0.541006	0.788621	-0.408928
rno-miR-802-5p	0	1	0	5	2	0	0	5	2	7	2	0	0.0451001	0.177278	-1.32344
rno-miR-872-3p	116	289	110	498	96	199	143	322	121	155	96	228	0.50149	0.75371	-0.2303
rno-miR-872-5p	29	262	68	331	28	93	0	227	39	345	23	77	0.180792	0.440092	-0.728194
rno-miR-874-3p	21	24	46	85	5	30	4	18	30	37	28	4	0.683124	0.88598	-0.187217
rno-miR-874-5p	0	0	2	1	0	0	0	0	0	0	1	0	0.863246	0.975356	0.109889
rno-miR-877	80	220	121	308	107	172	1090	110	79	116	49	143	0.721092	0.920729	0.116129
rno-miR-879-5p	0	0	0	3	3	0	0	4	0	3	1	3	0.141402	0.384342	-1.00822
rno-miR-92a-1-5p	6	3	6	24	5	6	2	6	2	9	7	2	0.948176	0.988096	0.0317522
rno-miR-92a-3p	5350	14021	8402	23848	4498	7230	6054	11153	11690	7328	4441	4835	0.728156	0.923238	-0.106531
rno-miR-92b-3p	15	90	46	94	14	40	19	58	61	35	19	10	0.679306	0.883271	-0.161472
rno-miR-93-3p	17	23	21	55	5	18	0	13	26	26	13	5	0.483199	0.744069	-0.32209
rno-miR-93-5p	926	2345	1031	4197	648	914	109	3013	1066	2484	828	803	0.065573	0.237644	-0.655878
rno-miR-96-5p	0	0	0	0	0	0	0	0	0	0	0	0	#N/A	#N/A	#N/A
rno-miR-98-3p	2	10	5	9	0	5	0	8	4	6	1	8	0.186463	0.446115	-0.715965
rno-miR-98-5p	36	207	105	228	18	82	10	118	42	109	24	86	0.546727	0.788621	-0.249077
rno-miR-99a-3p	3	7	4	12	4	1	1	6	4	12	7	3	0.0921605	0.294802	-0.823058
rno-miR-99a-5p	24	52	29	129	38	28	11	55	39	103	66	18	0.0291532	0.136496	-0.769333
rno-miR-99b-3p	20	46	26	72	33	21	66	21	12	15	9	24	0.0299169	0.136496	1.04462
rno-miR-99b-5p	3530	4754	5620	14404	2819	4098	497	1299	1534	1839	1895	256	0.00565457	0.0400571	1.16259
rno-miR-9a-5p	0	0	0	0	0	0	0	0	0	0	0	0	#N/A	#N/A	#N/A
rno-miR-9b-3p	0	0	0	0	0	0	0	0	0	0	0	0	#N/A	#N/A	#N/A
aca-miR-10c-5p	0	0	0	0	0	0	1	0	0	1	0	0	0.90035	0.986972	-0.0740804
aca-miR-5450	0	0	0	1	0	0	0	0	1	0	1	0	0.633118	0.846919	-0.3011
aga-miR-1175#aae-miR-1175-3p	7	7	2	5	4	5	17	7	6	1	10	3	0.630806	0.846041	0.286645
ame-miR-3776	12	14	18	69	8	32	20	2	7	6	4	4	0.000345383	0.0045254	1.67764
ame-miR-3782	2	0	1	4	0	0	0	1	0	0	2	1	0.771576	0.938936	-0.202453
ath-miR5021	4	12	11	5	2	6	14	7	20	11	9	1	0.585882	0.810726	-0.306524
ath-miR5658	2	2	1	8	3	3	3	2	1	1	6	2	0.900573	0.986972	-0.0740152
ath-miR833a-3p#aly-miR833-3p	6	8	5	8	3	9	3	3	1	4	7	8	0.938675	0.986972	-0.0401876
bfl-miR-10a-3p#bbe-miR-10a-3p	1	5	3	9	3	2	6	2	1	2	0	1	0.0634795	0.233367	1.13348
blv-miR-B3-3p	21	33	18	53	6	14	17	52	27	16	19	16	0.208985	0.472528	-0.486148
bmo-miR-2779	1	0	0	3	1	0	1	0	0	0	0	0	0.327719	0.613423	0.665895
bmo-miR-2840	0	0	0	0	0	0	0	0	0	0	0	0	#N/A	#N/A	#N/A
bta-miR-1434-5p	0	0	0	0	0	0	1	0	0	0	0	0	0.938686	0.986972	0.0396731
bta-miR-1940	7	7	10	56	7	8	6	6	2	24	7	8	0.946019	0.988096	0.0316426
bta-miR-2340	1288	1532	1465	1909	681	1228	3069	1506	1832	1674	3819	1797	0.412545	0.687951	-0.410553
bta-miR-2478	8	33	25	74	7	28	0	35	10	13	16	3	0.885874	0.986972	0.0672734
bta-miR-2487	81	270	159	700	96	309	761	165	35	113	42	70	0.00338919	0.0288646	0.924684
bta-miR-26c	966	4857	1611	7528	418	1617	60	4360	771	2609	816	432	0.768366	0.938936	-0.142491
bta-miR-2887	133	75	166	526	89	169	157	11	25	7	19	6	4.10805e-10	1.74935e-08	2.88268
bta-miR-2889	194	266	520	1063	145	303	385	50	98	144	81	79	7.28158e-05	0.0012403	1.6176
bta-miR-2898	37	272	136	425	23	88	28	175	97	44	63	28	0.853242	0.971062	0.0766874
bta-miR-2904	17	32	34	81	22	54	29	14	23	11	23	13	0.108298	0.320877	0.663334
bta-miR-2957	19	58	33	144	29	31	1	35	19	188	29	33	0.0736014	0.257102	-0.837996
bta-miR-3596	303	862	380	1502	195	344	139	637	274	345	225	147	0.517807	0.770093	0.167104
bta-miR-3600	18514	66101	32518	129880	22405	34344	1665	49360	18652	46808	21232	9065	0.981988	0.988096	0.00930195
bta-miR-3601	7	19	23	36	18	14	5	30	18	30	31	21	0.0111163	0.0668285	-0.93482
bta-miR-3604#ipu-miR-199b	58	231	87	653	221	172	9	498	149	893	253	193	0.00559014	0.0400571	-1.26105
bta-miR-669	46	188	135	240	56	96	5	224	176	260	199	38	0.00752603	0.0506026	-1.13708
cgr-miR-1260	28	67	85	201	18	54	39	35	35	16	12	7	0.00449877	0.0343115	1.12312
cgr-miR-1285	137	1230	463	569	12	144	46	823	408	301	53	27	0.714699	0.915488	-0.207405
cgr-miR-1973	1	0	0	0	0	0	0	1	0	0	0	0	0.911106	0.986972	-0.0625063
cin-miR-3575-5p	0	0	0	0	0	0	0	0	0	0	0	0	#N/A	#N/A	#N/A
cin-miR-4171-5p	3	3	5	0	2	0	0	1	1	0	1	0	0.256804	0.524907	0.786033
cpa-miR8154	5	11	3	7	1	0	5	3	15	5	7	3	0.18086	0.440092	-0.770245
crm-miR-7594	2	4	2	1	0	0	4	0	4	0	1	1	0.763802	0.938936	0.205385
dme-miR-10-3p#bmo-miR-10-3p#tca-miR-10-3p#cqu-miR-10-3p#mse-miR-10a	2196	3132	2866	9950	2212	2752	5710	1731	1392	2142	2043	1479	0.0324299	0.144408	0.904618
dme-miR-4949-5p	1	7	3	13	3	5	5	5	3	15	2	2	0.596962	0.815635	-0.271609
dps-miR-1002-3p	0	0	0	0	0	0	0	0	0	0	0	0	#N/A	#N/A	#N/A
dre-miR-125a#fru-miR-125a#tni-miR-125a#xtr-miR-125a#aca-miR-125a-5p#ola-miR-125a-5p#ipu-miR-125a	0	0	0	0	1	0	1	0	0	1	3	0	0.375701	0.663627	-0.608393
eca-miR-1271	4	19	2	21	2	6	0	21	5	5	9	0	0.348987	0.634634	-0.521391
gga-miR-1692	36	51	21	85	14	31	15	43	23	28	118	35	0.0324989	0.144408	-0.95982
gga-miR-1731-3p	11	3	8	20	7	8	11	9	11	2	20	3	0.773566	0.938936	-0.1572
gga-miR-1766	0	2	2	4	1	2	0	1	3	3	1	1	0.409902	0.687951	-0.528338
gga-miR-365b-5p	5	7	7	29	4	5	0	2	0	5	4	1	0.106298	0.320877	0.893566
gga-miR-6651-5p	2	4	3	8	0	1	0	1	0	2	0	1	0.300921	0.589159	0.695118
gma-miR4387b	0	0	0	2	0	0	0	1	1	0	3	0	0.161988	0.420182	-0.958755
hbr-miR482	8	2	5	3	3	5	4	7	6	9	12	5	0.128913	0.361949	-0.801858
hcmv-miR-US25-1-3p	0	0	0	1	0	0	0	0	0	0	0	0	0.972826	0.988096	0.0175666
hco-miR-5978	3	10	3	5	2	3	0	7	2	6	2	2	0.579786	0.808283	-0.302473
hhi-miR-7641	290	247	186	372	85	178	562	152	161	109	404	289	0.784184	0.94122	0.146766
hhv6b-miR-Ro6-1-3p	1	1	0	0	0	1	1	0	0	2	0	1	0.921506	0.986972	-0.0686218
hsa-miR-103b	5569	16316	11713	42438	11676	16406	9178	2057	885	2120	1033	1511	3.23036e-22	5.50238e-20	2.86212
hsa-miR-1248#ptr-miR-1248#bta-miR-1248#ppy-miR-1248	0	1	0	0	0	0	0	0	1	0	2	0	0.450107	0.725527	-0.492335
hsa-miR-1271-3p	1	14	1	15	4	0	0	3	0	4	2	1	0.465419	0.732601	0.467184
hsa-miR-1273g-3p	24	19	8	34	4	9	10	13	21	16	22	2	0.580861	0.808283	-0.27087
hsa-miR-1303#ptr-miR-1303	53	500	202	265	10	72	52	342	153	135	33	15	0.869461	0.978622	-0.0857195
hsa-miR-148a-3p#mmu-miR-148a-3p#gga-miR-148a-3p#ssc-miR-148a-3p#bta-miR-148a#xtr-miR-148a#oan-miR-148-3p#mml-miR-148a-3p#cfa-miR-148a#ptr-miR-148a#mdo-miR-148-3p#eca-miR-148a#tgu-miR-148-3p#ppy-miR-148a#aca-miR-148a-3p#oar-miR-148a	813	8312	2137	9726	609	2490	1336	10405	1439	7505	1649	4259	0.0258496	0.125802	-0.926493
hsa-miR-148a-5p#mmu-miR-148a-5p#ssc-miR-148a-5p#mml-miR-148a-5p	22	231	44	314	17	61	353	212	37	159	28	194	0.737673	0.927605	0.197328
hsa-miR-1973	2	1	0	0	0	0	0	3	0	0	0	1	0.646411	0.855023	-0.313586
hsa-miR-3168	1931	203	2267	322	417	151	1973	6495	6130	5153	122	345	0.217852	0.488256	-0.827169
hsa-miR-3184-3p	10509	18002	16364	27402	6773	11283	5900	8737	13011	10188	6958	4945	0.483427	0.744069	0.211034
hsa-miR-3184-5p	3265	4089	5284	13578	3158	5154	2378	579	890	960	845	629	7.09871e-12	4.5343e-10	2.11691
hsa-miR-3195	6	3	5	28	1	9	2	1	3	0	0	1	0.0092295	0.0582256	1.59481
hsa-miR-3529-3p	0	0	0	0	0	0	0	1	0	1	0	0	0.676478	0.883271	-0.217024
hsa-miR-3607-5p	0	0	0	0	0	0	0	0	0	0	1	0	0.811332	0.95258	-0.123103
hsa-miR-3692-3p	1	0	0	1	0	0	4	0	0	0	0	0	0.452922	0.725527	0.397728
hsa-miR-378g	7	18	17	56	20	25	35	5	4	8	8	6	0.00161354	0.016167	1.54138
hsa-miR-4286#bta-miR-4286	4	15	10	23	1	4	6	6	5	3	1	2	0.128474	0.361949	0.771357
hsa-miR-4301	23	68	35	61	3	17	0	44	90	39	24	9	0.0694805	0.247874	-0.96996
hsa-miR-4448	17	19	6	55	8	16	3	20	20	17	70	14	0.0090022	0.0582256	-1.26301
hsa-miR-4454	22	14	23	173	109	7	35	47	4	7	53	8	0.237737	0.506997	0.698276
hsa-miR-4485	0	6	0	3	0	3	2	5	1	0	2	0	0.975541	0.988096	-0.0208071
hsa-miR-4492	21	45	50	63	30	105	14	10	20	18	39	13	0.162965	0.420254	0.642573
hsa-miR-4497	2	7	4	11	0	6	7	1	1	1	3	2	0.109661	0.320877	0.951558
hsa-miR-4502	5	2	5	7	4	8	3	2	6	1	2	1	0.325377	0.612575	0.563075
hsa-miR-4508	0	1	6	2	0	6	0	0	0	0	0	0	0.0492002	0.190464	1.36287
hsa-miR-4523	5	51	21	61	3	11	1	47	35	26	5	15	0.0819896	0.277461	-0.840893
hsa-miR-4532	2	7	4	11	4	6	13	5	1	8	1	4	0.240722	0.508984	0.656298
hsa-miR-4792	243	238	212	1650	458	467	1749	49	154	165	99	389	0.0119311	0.0704922	1.46957
hsa-miR-486-3p#mmu-miR-486-3p#mml-miR-486-3p#eca-miR-486-3p	676	399	666	1138	349	167	22	991	2258	1277	750	749	0.00208857	0.0197641	-1.52506
hsa-miR-486-5p#mmu-miR-486-5p#mml-miR-486-5p#ptr-miR-486#bta-miR-486#eca-miR-486-5p#ssc-miR-486#mmu-miR-3107-5p#ppy-miR-486-5p#cgr-miR-486-5p#ggo-miR-486	768330	394035	607305	1404974	501735	121630	159464	501631	990581	824983	381213	571503	0.229677	0.495212	-0.537367
hsa-miR-5585-3p	3	5	2	4	2	1	4	1	3	0	2	1	0.377791	0.663627	0.548027
hsa-miR-574-3p#mmu-miR-574-3p#cfa-miR-574#ssc-miR-574#ggo-miR-574	59	232	165	302	93	117	7	266	227	323	241	44	0.0136385	0.0765852	-1.05851
hsa-miR-589-5p#mml-miR-589#ppy-miR-589	2	1	0	12	3	5	0	1	0	0	0	1	0.0575354	0.219407	1.30547
hsa-miR-619-5p	0	0	0	1	1	0	0	0	0	0	0	1	0.974961	0.988096	-0.020083
hsa-miR-6797-5p	0	0	0	1	0	0	0	0	0	0	0	0	0.972826	0.988096	0.0175666
hsa-miR-718#ptr-miR-718	5	11	29	23	7	29	22	0	1	2	0	0	5.27659e-08	1.49797e-06	3.31465
hsa-miR-7641	18	11	10	22	6	10	42	5	13	8	16	10	0.323452	0.612163	0.557227
hsa-miR-7704	3	4	13	25	10	19	7	1	1	2	8	1	0.0188352	0.100218	1.3272
hsa-miR-7847-3p	1	1	1	10	1	2	6	2	5	3	2	3	0.62924	0.846041	-0.288898
hsa-miR-7977	7	5	4	18	5	2	3	8	1	4	7	4	0.937189	0.986972	-0.040058
hsv1-miR-H17	11	18	64	36	4	37	196	5	18	8	11	6	0.156656	0.414773	0.729073
ipu-miR-16c	0	0	0	1	0	0	0	0	0	5	0	0	0.352554	0.636591	-0.569931
mdo-miR-7341-5p	0	0	0	0	0	0	0	0	0	0	0	0	#N/A	#N/A	#N/A
mdo-miR-7371c-5p	0	0	0	0	0	0	0	0	0	0	0	0	#N/A	#N/A	#N/A
mml-miR-7164-5p	3	1	0	1	0	0	2	0	0	0	2	0	0.486255	0.745504	0.483965
mmu-let-7g-5p#hsa-let-7g-5p#bta-let-7g#oan-let-7g-5p#mml-let-7g-5p#cfa-let-7g#ptr-let-7g#eca-let-7g#ssc-let-7g#tgu-let-7g-5p#ppy-let-7g#aca-let-7g#cgr-let-7g-5p	3	33	5	37	1	10	1	20	3	12	3	1	0.818867	0.95258	0.123233
mmu-miR-1187	11	16	6	14	2	12	2	4	2	3	4	0	0.02648	0.127654	1.18156
mmu-miR-1195	19	44	30	104	41	39	96	38	20	63	52	23	0.443201	0.7191	0.371725
mmu-miR-1247-5p#hsa-miR-1247-5p#ptr-miR-1247#ppy-miR-1247#mml-miR-1247-5p	6	3	8	10	1	1	3	2	2	5	3	2	0.604434	0.821452	0.2916
mmu-miR-142b	1	28	12	23	3	16	0	21	6	51	4	23	0.0334323	0.144483	-1.1312
mmu-miR-149-5p#hsa-miR-149-5p#mml-miR-149-5p#ptr-miR-149#cfa-miR-149#eca-miR-149#ppy-miR-149#ssc-miR-149#ggo-miR-149#bta-miR-149-5p	1	2	0	5	7	3	7	6	19	9	14	14	0.0098007	0.0596209	-1.5074
mmu-miR-16-1-3p#oan-miR-16a-3p	0	0	2	1	0	0	0	2	1	3	0	0	0.312456	0.600643	-0.702299
mmu-miR-1895	3	2	2	9	3	1	4	4	1	8	0	6	0.593816	0.813512	-0.311493
mmu-miR-1940	1	5	2	6	1	10	2	5	1	9	2	6	0.386049	0.668715	-0.482626
mmu-miR-1957a	1	12	0	22	5	2	4	5	4	2	13	3	0.480482	0.744069	-0.409292
mmu-miR-1983	10	75	21	80	12	30	7	77	18	55	19	7	0.264355	0.536053	-0.442296
mmu-miR-2137	59	130	169	280	55	138	795	28	86	101	40	150	0.949733	0.988096	-0.027003
mmu-miR-30f	7	3	10	23	12	10	30	4	3	14	3	9	0.108548	0.320877	0.913516
mmu-miR-3470a	1	2	0	0	0	1	0	1	1	2	1	1	0.278778	0.558172	-0.749374
mmu-miR-3470b	10	7	13	20	8	7	11	10	12	13	14	5	0.647542	0.855023	-0.20529
mmu-miR-3472	4	1	2	7	0	1	1	1	0	0	2	0	0.226744	0.495212	0.82523
mmu-miR-3473a	2	3	0	5	0	2	1	3	2	3	3	1	0.284073	0.564144	-0.655678
mmu-miR-3473b	6	7	7	10	3	5	13	3	8	6	11	5	0.91141	0.986972	-0.0592741
mmu-miR-3535	4	6	12	58	19	14	12	6	5	3	4	0	0.00261741	0.0230603	1.57652
mmu-miR-3963	0	2	0	0	0	0	0	0	0	0	0	0	0.826553	0.954145	0.113057
mmu-miR-3968	5	2	4	8	3	3	1	0	3	1	0	2	0.175416	0.435133	0.842094
mmu-miR-466i-5p	8	2	6	8	2	1	0	0	2	2	0	1	0.106519	0.320877	1.05403
mmu-miR-5099	0	3	0	0	0	0	0	0	0	0	0	1	0.876802	0.984717	0.0922288
mmu-miR-5100	1	1	4	7	1	0	0	1	4	0	3	0	0.640662	0.850333	-0.314948
mmu-miR-5106	15	13	13	12	4	15	5	9	13	10	46	7	0.0904351	0.294572	-0.881322
mmu-miR-5119	3	3	2	5	2	9	14	3	3	2	6	3	0.408549	0.687951	0.497831
mmu-miR-5126	5	5	10	16	3	14	18	3	1	7	1	4	0.0198675	0.101593	1.31262
mmu-miR-6236	3	2	2	24	2	16	23	1	1	0	1	1	0.000512582	0.00654823	2.25102
mmu-miR-6238	15	11	8	36	5	14	8	1	8	2	4	2	0.0148294	0.0823674	1.2415
mmu-miR-6239	35	11	23	92	23	35	18	19	26	11	23	17	0.500717	0.75371	0.297119
mmu-miR-6240	188	250	203	720	123	155	22	63	99	65	233	30	0.406983	0.687951	0.390095
mmu-miR-6343	0	0	1	0	0	0	0	0	0	0	0	0	0.938686	0.986972	0.0396731
mmu-miR-6412	4	9	4	21	2	3	0	8	6	6	2	7	0.279632	0.558172	-0.532142
mmu-miR-682	3	2	5	3	0	4	1	3	0	0	5	2	0.966152	0.988096	-0.0272641
mmu-miR-690	19	17	10	29	10	9	7	13	19	27	27	4	0.190489	0.446514	-0.580381
mmu-miR-6937-5p	10	7	5	38	10	3	14	8	4	4	14	8	0.678691	0.883271	0.217998
mmu-miR-6971-3p	4	5	3	9	0	3	5	9	6	2	8	0	0.396909	0.678329	-0.485171
mmu-miR-709	9	11	19	33	7	24	12	8	14	7	11	5	0.361681	0.650771	0.4037
mmu-miR-7225-5p	1	1	2	2	1	0	0	1	1	0	3	3	0.226799	0.495212	-0.812567
mmu-miR-744-3p#hsa-miR-744-3p	5	2	3	11	3	1	0	4	0	3	2	0	0.451667	0.725527	0.470573
mmu-miR-744-5p#hsa-miR-744-5p#ptr-miR-744#bta-miR-744#ssc-miR-744#ppy-miR-744	350	722	464	1111	265	425	81	582	720	585	468	394	0.0198813	0.101593	-0.715669
mmu-miR-7667-3p	17	12	20	54	23	15	78	13	6	22	7	8	0.00936018	0.0583299	1.42249
mmu-miR-7667-5p	1197	1082	1665	4305	1798	1273	3228	1513	914	2612	491	888	0.116554	0.332732	0.716498
mmu-miR-7687-5p	6	15	7	18	3	10	0	8	10	5	9	4	0.47842	0.744069	-0.331319
mne-miR-140	5	18	11	59	17	25	6	15	11	46	12	19	0.241516	0.508984	-0.47675
oan-miR-1386	13	77	33	147	9	44	6	56	28	36	19	5	0.910917	0.986972	0.0456695
oan-miR-30f	0	0	0	5	0	1	1	0	0	1	0	0	0.571825	0.808283	0.382547
oan-miR-7427-5p	0	0	0	1	0	0	0	0	0	0	0	0	0.972826	0.988096	0.0175666
oan-miR-92d	5	6	1	7	4	4	1	6	5	5	3	0	0.762479	0.938936	-0.165132
pma-miR-192-5p	5	3	3	4	1	7	4	2	1	2	1	0	0.0604339	0.228754	1.16085
ppc-miR-2241a	8	14	9	12	2	14	11	7	9	3	5	5	0.390492	0.671857	0.425397
ppy-miR-151b	618	2253	1140	3867	692	1330	1166	1504	717	894	623	506	0.0778427	0.265184	0.516618
prd-miR-7911c-3p	0	0	0	0	0	1	0	0	0	0	0	0	0.938686	0.986972	0.0396731
rrv-miR-rR1-4-5p	0	0	0	0	0	0	0	0	0	0	0	0	#N/A	#N/A	#N/A
sha-miR-716b	33	28	21	33	10	24	16	12	20	15	25	5	0.519926	0.770093	0.290639
spu-miR-10	0	0	1	2	1	1	0	0	0	1	0	0	0.588531	0.810726	0.370373
spu-miR-5993	0	1	0	0	0	0	0	0	0	1	0	0	0.92318	0.986972	-0.0497481
ssc-miR-1285	27	72	49	173	10	50	81	47	43	24	27	28	0.260859	0.531072	0.504854
ssc-miR-4332	3	1	5	8	0	4	2	1	0	0	0	2	0.0639672	0.23348	1.23267
tae-miR1134	3	0	0	2	0	0	2	0	6	0	1	0	0.628561	0.846041	-0.337032
tca-miR-3815-3p	0	1	1	1	0	0	0	0	6	1	5	2	0.00428086	0.0339801	-1.95354
tur-miR-10-5p	0	2	0	2	0	0	0	0	0	0	0	0	0.722529	0.920729	0.192015
